# Supplementary material for: Efficacy and safety of endocrine therapy after mastectomy in patients with hormone receptor positive breast ductal carcinoma in situ: Retrospective cohort study
Source: eLife. 2023 Feb 6;12:e83045. doi: 10.7554/eLife.83045 (PMC9901931; doi:10.7554/eLife.83045)
Supplement: Figure 2—source data 1. [file elife-83045-fig2-data1.xlsx]

## Sheet: Sheet1
No.	Age	Age（>50）	T stage	Microinvasive	Tumor Grade（level 3）	Ki67 level (<15%)	ET	Recurrence/metastasis	Time and site	DFS
1	42	0	T1	1	0	1	1	0	0	88
2	50	0	T1	0	0	1	0	0	0	85
3	65	1	T1	0	0	1	0	0	0	156
4	47	0	T1	1	0	1	0	0	0	117
5	32	0	T1	0	0	1	0	0	0	88
6	42	0	T1	0	0	1	1	0	0	164
7	58	1	T1	1	0	0	1	0	0	107
8	45	0	T1	1	0	1	0	0	0	156
9	71	1	T1	0	0	1	1	0	0	162
10	56	1	T2	1	0	1	1	0	0	68
11	61	1	T1	0	0	1	1	0	0	160
12	47	0	T1	0	0	1	0	0	0	59
13	46	0	T1	1	0	1	0	0	0	83
14	46	0	T1	1	0	1	1	0	0	157
15	72	1	T1	0	0	1	0	0	0	90
16	44	0	T1	0	0	1	1	0	0	156
17	74	1	T1	0	0	1	1	0	0	156
18	72	1	T1	1	0	1	0	0	0	77
19	69	1	T2	1	1	1	1	0	0	155
20	46	0	T1	0	0	1	0	0	0	56
21	61	1	T1	1	0	1	0	0	0	110
22	53	1	T1	1	0	1	1	0	0	152
23	45	0	T2	1	0	1	0	0	0	84
24	49	0	T2	0	0	1	1	0	0	149
25	41	0	T1	1	0	1	1	0	0	135
26	42	0	T1	0	0	1	0	0	0	76
27	47	0	T1	0	0	1	0	0	0	106
28	46	0	T1	0	0	1	1	0	0	148
29	51	1	T1	0	0	1	1	0	0	148
30	75	1	T1	1	0	1	1	0	0	134
31	39	0	T2	1	0	1	1	0	0	60
32	52	1	T1	1	1	1	1	0	0	131
33	55	1	T1	0	0	0	0	0	0	89
34	51	1	T1	1	0	1	0	0	0	87
35	70	1	T1	0	0	1	1	0	0	147
36	53	1	T1	1	0	1	0	0	0	84
37	43	0	T2	0	0	1	1	0	0	147
38	60	1	T2	1	0	1	0	0	0	57
39	38	0	T1	1	1	1	1	0	0	146
40	47	0	T1	0	0	1	1	0	0	104
41	68	1	T1	0	1	1	1	0	0	125
42	46	0	T1	0	0	1	1	0	0	144
43	34	0	T2	1	1	1	1	0	0	124
44	68	1	T2	0	1	1	1	0	0	105
45	53	1	T2	1	1	1	1	1	bone metastasis in May,2016	143
46	48	0	T2	1	0	1	1	0	0	110
47	42	0	T1	1	1	0	1	0	0	108
48	75	1	T1	0	0	1	1	0	0	65
49	50	0	T1	0	0	1	1	0	0	66
50	65	1	T2	0	0	1	1	1	lung metastasis in September,2011	21
51	58	1	T1	0	0	1	1	0	0	132
52	49	0	T1	1	1	1	1	0	0	129
53	43	0	T1	0	0	1	1	0	0	140
54	58	1	T2	1	1	0	1	0	0	126
55	42	0	T1	0	0	1	1	0	0	140
56	64	1	T2	0	1	1	1	0	0	140
57	44	0	T2	0	0	1	1	0	0	139
58	54	1	T2	0	0	1	1	0	0	139
59	62	1	T1	0	0	1	1	0	0	139
60	37	0	T1	0	0	1	0	0	0	107
61	53	1	T1	0	0	1	1	0	0	63
62	49	0	T1	1	0	1	1	0	0	138
63	48	0	T1	1	0	1	0	0	0	63
64	42	0	T1	0	0	1	1	0	0	137
65	51	1	T2	0	1	1	0	0	0	88
66	55	1	T1	1	1	0	1	0	0	61
67	62	1	T2	1	0	0	1	0	0	129
68	54	1	T1	0	1	1	1	0	0	120
69	46	0	T1	0	0	1	1	0	0	136
70	34	0	T1	0	0	1	1	0	0	136
71	61	1	T1	0	0	1	1	0	0	136
72	43	0	T1	1	0	1	1	0	0	136
73	38	0	T1	0	0	1	1	0	0	143
74	59	1	T3	0	0	1	1	0	0	90
75	45	0	T2	0	0	1	0	0	0	123
76	49	0	T1	0	1	1	1	0	0	135
77	38	0	T1	0	0	1	1	0	0	135
78	61	1	T1	0	0	1	1	0	0	135
79	56	1	T2	0	0	1	0	0	0	86
80	70	1	T2	0	0	1	1	0	0	135
81	53	1	T1	0	0	1	1	0	0	135
82	71	1	T1	1	0	1	1	0	0	161
83	49	0	T1	1	0	1	1	0	0	75
84	50	0	T1	0	0	1	1	0	0	135
85	55	1	T1	0	1	1	1	0	0	66
86	42	0	T1	1	1	0	1	1	bone metastasis in November,2013	101
87	56	1	T1	1	1	0	1	0	0	64
88	49	0	T1	0	1	1	1	0	0	134
89	47	0	T1	0	0	1	0	0	0	97
90	72	1	T2	0	0	1	1	0	0	132
91	45	0	T1	0	0	1	1	0	0	133
92	70	1	T1	0	1	0	1	0	0	133
93	48	0	T1	0	0	1	1	0	0	132
94	74	1	T1	0	0	1	1	0	0	148
95	47	0	T1	0	1	1	1	0	0	148
96	72	1	T1	0	0	1	1	0	0	132
97	52	1	T1	0	0	1	1	0	0	131
98	44	0	T2	1	0	0	0	0	0	147
99	78	1	T1	0	0	1	0	0	0	85
100	81	1	T1	0	1	0	1	0	0	83
101	42	0	T1	1	0	1	0	0	0	91
102	44	0	T2	0	0	1	0	0	0	87
103	36	0	T2	0	0	1	1	0	0	130
104	52	1	T1	0	1	1	1	0	0	130
105	45	0	T1	0	0	1	1	0	0	130
106	56	1	T1	0	1	1	1	0	0	130
107	38	0	T1	0	0	1	0	0	0	117
108	48	0	T2	0	1	1	1	0	0	105
109	53	1	T1	1	1	0	1	0	0	63
110	49	0	T1	1	1	0	1	0	0	110
111	68	1	T1	1	0	0	1	0	0	136
112	45	0	T1	0	0	1	1	0	0	129
113	45	0	T1	0	0	1	1	0	0	129
114	47	0	T3	0	0	1	1	0	0	129
115	38	0	T2	0	0	1	1	0	0	124
116	50	0	T2	0	0	1	1	0	0	128
117	62	1	T2	0	1	1	0	1	bone metastasis in August,2013	85
118	32	0	T2	1	1	1	1	1	bone metastasis in December,2012	63
119	57	1	T2	0	0	1	1	0	0	127
120	38	0	T1	0	0	1	1	0	0	127
121	38	0	T2	0	0	1	1	0	0	80
122	60	1	T1	0	0	0	1	0	0	126
123	41	0	T1	0	0	1	1	0	0	77
124	41	0	T1	0	1	0	1	0	0	108
125	47	0	T1	0	0	1	1	0	0	120
126	48	0	T1	0	0	0	0	0	0	63
127	44	0	T1	0	0	1	1	0	0	103
128	31	0	T2	0	0	1	1	0	0	78
129	63	1	T2	0	0	1	1	0	0	69
130	37	0	T2	0	0	1	1	0	0	124
131	48	0	T1	0	0	1	1	0	0	124
132	37	0	T2	0	1	1	1	0	0	145
133	51	1	T2	0	1	1	1	0	0	124
134	38	0	T1	0	0	1	1	0	0	124
135	64	1	T2	0	0	0	1	0	0	65
136	64	1	T2	0	0	0	1	0	0	65
137	74	1	T2	0	0	1	1	0	0	123
138	42	0	T1	0	0	1	1	0	0	75
139	46	0	T1	0	1	1	1	0	0	120
140	58	1	T3	0	0	1	0	0	0	61
141	48	0	T2	0	1	1	1	0	0	68
142	69	1	T2	0	0	1	1	0	0	122
143	53	1	T1	0	1	1	1	0	0	140
144	32	0	T2	0	0	1	1	0	0	122
145	66	1	T2	0	0	1	0	0	0	68
146	70	1	T1	0	1	1	1	0	0	122
147	70	1	T1	0	0	1	1	0	0	67
148	72	1	T1	0	0	1	1	0	0	121
149	40	0	T1	0	0	1	1	0	0	121
150	40	0	T1	0	0	1	1	0	0	121
151	35	0	T2	0	0	1	1	0	0	74
152	44	0	T1	0	0	1	1	0	0	129
153	71	1	T1	0	0	1	1	0	0	60
154	73	1	T1	0	0	1	1	0	0	67
155	54	1	T1	1	1	1	1	0	0	93
156	40	0	T2	0	0	1	1	0	0	148
157	35	0	T1	0	0	1	1	0	0	120
158	38	0	T2	1	0	0	1	0	0	136
159	57	1	T2	0	0	1	1	0	0	144
160	59	1	T1	0	0	1	0	0	0	83
161	39	0	T1	0	0	1	1	0	0	120
162	41	0	T1	0	0	1	1	0	0	119
163	55	1	T1	0	0	1	1	0	0	119
164	29	0	T3	0	0	1	1	0	0	119
165	49	0	T1	1	1	0	1	1	bone metastasis in April,2013	82
166	48	0	T2	0	0	1	0	0	0	92
167	61	1	T1	0	0	1	1	0	0	72
168	49	0	T2	0	0	1	1	0	0	118
169	48	0	T1	0	0	0	1	0	0	118
170	32	0	T2	1	1	1	1	0	0	77
171	47	0	T2	0	0	1	1	0	0	118
172	47	0	T1	0	0	1	1	0	0	117
173	36	0	T2	0	1	1	0	0	0	79
174	60	1	T1	0	0	1	0	0	0	72
175	48	0	T2	0	1	1	0	0	0	117
176	44	0	T1	0	0	1	0	0	0	111
177	40	0	T1	0	1	1	1	0	0	70
178	54	1	T1	0	0	1	0	0	0	67
179	67	1	T1	0	0	1	1	0	0	117
180	42	0	T1	0	0	0	1	0	0	95
181	47	0	T2	0	0	1	1	0	0	70
182	50	0	T1	0	1	0	1	0	0	92
183	72	1	T2	0	1	1	1	0	0	70
184	39	0	T1	0	0	1	1	0	0	116
185	44	0	T2	0	1	1	1	0	0	70
186	45	0	T1	0	1	1	0	0	0	76
187	50	0	T2	0	0	1	1	0	0	115
188	61	1	T2	0	0	0	1	0	0	80
189	73	1	T2	0	0	1	1	0	0	115
190	76	1	T1	0	0	1	1	0	0	86
191	48	0	T1	0	1	0	1	0	0	114
192	44	0	T1	0	0	1	0	0	0	68
193	48	0	T2	0	0	1	1	0	0	114
194	53	1	T2	0	0	1	1	0	0	114
195	53	1	T1	0	1	1	1	0	0	114
196	40	0	T1	0	1	1	1	0	0	72
197	46	0	T1	1	1	0	1	0	0	86
198	41	0	T1	0	1	1	1	0	0	126
199	47	0	T1	0	0	1	1	0	0	58
200	45	0	T3	0	1	0	0	0	0	71
201	76	1	T2	0	0	1	1	0	0	113
202	53	1	T3	0	0	0	1	1	bone metastasis in December,2014	73
203	59	1	T1	0	0	1	1	0	0	113
204	46	0	T2	0	0	1	1	0	0	62
205	32	0	T2	1	0	1	1	0	0	88
206	32	0	T1	0	0	1	1	0	0	113
207	71	1	T1	1	0	0	1	0	0	113
208	50	0	T1	0	1	1	1	0	0	69
209	48	0	T2	0	0	1	1	0	0	112
210	73	1	T1	0	0	1	1	0	0	81
211	41	0	T2	0	0	1	1	0	0	112
212	41	0	T1	0	0	1	1	0	0	112
213	43	0	T2	0	0	1	1	0	0	85
214	70	1	T1	0	0	1	1	0	0	112
215	59	1	T1	0	0	1	0	0	0	61
216	75	1	T1	0	0	1	1	0	0	112
217	52	1	T1	0	0	1	1	0	0	112
218	39	0	T1	0	0	1	0	0	0	112
219	75	1	T2	0	0	0	1	0	0	112
220	60	1	T1	0	0	1	1	0	0	77
221	58	1	T1	0	0	1	1	0	0	112
222	37	0	T1	0	0	1	1	0	0	76
223	60	1	T2	0	0	0	1	0	0	77
224	49	0	T1	0	0	1	1	0	0	111
225	48	0	T1	0	0	1	1	0	0	88
226	53	1	T1	0	0	1	1	0	0	85
227	33	0	T2	0	0	1	1	0	0	71
228	45	0	T2	0	1	1	1	0	0	68
229	49	0	T2	0	0	1	1	0	0	111
230	43	0	T1	0	0	1	0	0	0	89
231	50	0	T2	0	0	1	1	0	0	111
232	46	0	T1	0	0	1	1	0	0	111
233	38	0	T2	0	0	0	0	0	0	105
234	86	1	T2	1	0	0	1	0	0	64
235	39	0	T1	0	0	1	1	0	0	111
236	45	0	T1	0	0	1	1	0	0	111
237	80	1	T1	0	0	1	1	0	0	111
238	49	0	T1	1	0	1	1	0	0	111
239	46	0	T1	1	0	0	1	0	0	111
240	61	1	T1	0	0	1	0	0	0	82
241	33	0	T2	0	1	1	1	1	cervical lymph node metastasis in April,2020	80
242	43	0	T1	0	0	1	1	0	0	110
243	33	0	T2	1	1	0	1	0	0	110
244	49	0	T1	0	1	1	1	0	0	60
245	41	0	T1	0	1	1	1	0	0	123
246	43	0	T3	0	0	1	0	0	0	99
247	61	1	T1	0	0	1	1	0	0	110
248	52	1	T1	1	0	0	1	0	0	100
249	53	1	T3	0	0	1	1	0	0	110
250	28	0	T2	0	0	0	1	0	0	110
251	45	0	T2	0	0	1	1	0	0	140
252	51	1	T2	0	1	1	0	0	0	67
253	53	1	T1	0	1	1	0	0	0	68
254	31	0	T2	1	1	1	1	0	0	68
255	60	1	T2	0	0	1	1	0	0	117
256	57	1	T1	0	0	0	1	0	0	109
257	65	1	T1	1	1	0	1	0	0	109
258	75	1	T3	0	1	1	1	0	0	109
259	54	1	T2	0	0	1	1	0	0	76
260	53	1	T1	1	0	0	1	0	0	109
261	48	0	T1	0	0	1	1	0	0	109
262	49	0	T1	0	0	1	1	0	0	109
263	28	0	T2	0	0	1	1	0	0	109
264	76	1	T3	0	0	0	1	0	0	109
265	45	0	T2	0	0	1	1	1	liver metastasis in January,2018	60
266	75	1	T1	0	0	1	1	0	0	64
267	45	0	T2	1	0	1	1	0	0	108
268	50	0	T1	0	1	1	1	0	0	59
269	56	1	T2	0	0	1	1	0	0	108
270	54	1	T2	0	0	1	1	0	0	108
271	38	0	T1	1	1	0	1	0	0	72
272	33	0	T1	0	1	1	1	0	0	67
273	63	1	T1	0	1	1	1	0	0	67
274	57	1	T1	1	0	1	0	0	0	92
275	58	1	T1	1	0	0	1	0	0	62
276	48	0	T2	0	1	1	1	0	0	107
277	80	1	T1	0	0	1	0	0	0	62
278	47	0	T1	0	0	1	1	0	0	107
279	73	1	T1	0	0	1	1	0	0	81
280	31	0	T1	0	0	1	1	0	0	66
281	57	1	T1	0	0	0	1	0	0	98
282	50	0	T1	0	0	1	1	0	0	65
283	43	0	T1	0	0	1	0	0	0	65
284	73	1	T1	0	0	1	1	0	0	107
285	49	0	T1	0	1	1	0	0	0	131
286	72	1	T1	0	0	1	1	0	0	76
287	38	0	T1	0	1	0	0	0	0	107
288	44	0	T1	0	1	0	1	0	0	72
289	44	0	T2	1	1	0	0	0	0	131
290	56	1	T2	1	0	0	1	0	0	107
291	53	1	T2	0	0	1	0	0	0	80
292	33	0	T1	1	1	1	1	0	0	105
293	58	1	T2	1	0	0	1	0	0	75
294	58	1	T1	0	0	1	1	0	0	105
295	46	0	T2	0	0	1	1	0	0	77
296	46	0	T1	0	1	1	1	0	0	66
297	40	0	T2	1	1	1	1	0	0	77
298	49	0	T1	0	1	1	1	0	0	106
299	53	1	T1	1	0	1	1	0	0	77
300	63	1	T1	0	0	1	1	0	0	105
301	78	1	T1	0	0	1	0	0	0	87
302	64	1	T1	0	1	1	1	0	0	65
303	39	0	T2	1	0	1	0	0	0	135
304	42	0	T1	1	0	0	1	0	0	100
305	54	1	T1	0	0	1	1	0	0	64
306	50	0	T1	0	0	1	1	0	0	105
307	44	0	T2	0	0	1	1	0	0	68
308	34	0	T1	0	0	1	1	0	0	63
309	48	0	T1	1	1	0	1	0	0	105
310	49	0	T2	0	0	0	1	0	0	105
311	50	0	T2	0	0	0	0	0	0	81
312	47	0	T2	0	0	0	1	0	0	105
313	45	0	T2	1	0	0	0	0	0	100
314	35	0	T2	1	0	0	1	1	local recurrence in December,2020	101
315	54	1	T2	0	0	1	1	0	0	81
316	43	0	T1	0	0	0	1	0	0	73
317	45	0	T2	0	0	1	1	0	0	81
318	39	0	T1	1	0	0	1	0	0	81
319	49	0	T2	0	1	1	1	0	0	66
320	52	1	T2	1	0	0	1	0	0	61
321	49	0	T1	0	1	1	1	0	0	60
322	46	0	T2	1	0	0	1	0	0	76
323	64	1	T1	0	0	1	1	0	0	93
324	60	1	T2	1	0	0	0	0	0	87
325	51	1	T2	0	0	1	1	0	0	101
326	37	0	T1	0	0	1	1	1	local recurrence in December,2020	74
327	40	0	T2	0	0	0	1	0	0	113
328	49	0	T1	0	0	1	1	0	0	88
329	56	1	T1	0	0	1	0	0	0	81
330	48	0	T1	0	1	0	0	0	0	125
331	41	0	T2	0	1	0	1	0	0	67
332	62	1	T1	0	0	1	1	0	0	80
333	43	0	T1	0	1	1	0	0	0	78
334	63	1	T1	1	0	1	1	0	0	60
335	47	0	T2	0	0	1	1	0	0	88
336	37	0	T2	1	1	1	1	0	0	96
337	51	1	T1	0	0	1	1	0	0	93
338	44	0	T1	1	0	0	1	0	0	88
339	48	0	T1	0	1	1	1	0	0	93
340	57	1	T3	0	0	1	1	0	0	140
341	46	0	T1	0	0	1	1	0	0	99
342	60	1	T2	1	1	0	1	0	0	77
343	39	0	T1	1	1	1	1	0	0	69
344	70	1	T1	1	0	1	0	0	0	59
345	59	1	T1	0	0	0	1	0	0	100
346	58	1	T2	0	1	0	1	0	0	67
347	75	1	T3	0	0	1	1	0	0	116
348	46	0	T3	0	0	1	1	0	0	100
349	52	1	T2	0	1	1	0	0	0	148
350	62	1	T2	0	1	1	0	0	0	83
351	58	1	T2	0	0	0	0	0	0	85
352	41	0	T2	0	1	1	1	0	0	80
353	46	0	T1	0	0	1	1	0	0	100
354	48	0	T1	0	0	1	1	0	0	104
355	53	1	T1	0	0	1	1	0	0	97
356	61	1	T1	0	0	1	0	0	0	63
357	68	1	T2	0	0	1	1	0	0	70
358	51	1	T1	0	1	1	1	0	0	76
359	56	1	T1	1	1	1	1	0	0	111
360	40	0	T2	0	0	1	1	0	0	78
361	53	1	T2	1	0	1	1	0	0	72
362	53	1	T2	0	0	0	1	0	0	79
363	51	1	T1	1	0	1	0	0	0	66
364	42	0	T1	0	0	1	1	0	0	139
365	51	1	T2	0	0	1	1	1	contralateral DCIS in May, 2014	125
366	38	0	T1	0	1	1	1	0	0	72
367	76	1	T1	1	0	1	1	0	0	81
368	60	1	T1	0	0	1	1	0	0	133
369	44	0	T1	0	0	1	1	0	0	73
370	43	0	T2	0	0	1	1	0	0	94
371	56	1	T1	1	0	0	1	0	0	98
372	57	1	T2	1	0	1	1	0	0	104
373	47	0	T1	0	0	1	1	0	0	74
374	57	1	T1	0	0	0	1	0	0	77
375	65	1	T2	1	0	1	1	0	0	78
376	51	1	T2	0	0	1	0	0	0	80
377	56	1	T1	1	1	0	1	0	0	81
378	53	1	T2	0	1	1	0	0	0	152
379	44	0	T2	0	0	1	1	0	0	83
380	48	0	T1	0	0	1	1	0	0	79
381	55	1	T2	0	0	1	1	0	0	96
382	43	0	T2	1	1	0	1	0	0	96
383	28	0	T3	0	0	1	1	0	0	96
384	75	1	T2	0	0	1	1	0	0	114
385	73	1	T1	0	0	1	1	0	0	113
386	64	1	T1	0	0	1	1	0	0	67
387	63	1	T2	0	0	0	1	0	0	96
388	61	1	T2	1	0	1	0	0	0	101
389	44	0	T1	0	0	0	1	0	0	96
390	61	1	T1	0	0	1	0	0	0	79
391	61	1	T2	0	1	1	1	1	bone metastasis in September, 2014	158
392	42	0	T1	0	0	1	1	0	0	89
393	53	1	T2	0	0	1	0	0	0	86
394	66	1	T1	0	0	1	1	1	contralateral DCIS in August, 2016	35
395	44	0	T1	0	0	0	1	0	0	95
396	40	0	T3	0	0	0	1	0	0	95
397	72	1	T2	0	0	0	1	0	0	95
398	60	1	T2	0	0	0	1	0	0	95
399	66	1	T2	0	0	1	1	0	0	95
400	61	1	T1	0	0	0	1	0	0	121
401	50	0	T1	0	0	0	1	0	0	95
402	56	1	T1	1	0	1	1	0	0	60
403	73	1	T2	1	0	1	1	0	0	108
404	47	0	T1	0	0	1	1	0	0	74
405	56	1	T2	0	0	0	1	0	0	101
406	49	0	T2	0	1	0	1	0	0	64
407	59	1	T1	0	1	1	0	0	0	70
408	53	1	T1	0	0	0	1	0	0	94
409	48	0	T1	0	0	1	1	0	0	83
410	47	0	T2	0	0	1	1	0	0	78
411	51	1	T1	0	0	0	0	0	0	94
412	76	1	T1	0	0	1	1	0	0	64
413	57	1	T2	0	0	1	1	0	0	94
414	67	1	T1	1	0	0	1	0	0	86
415	48	0	T2	0	0	0	1	0	0	93
416	42	0	T2	0	0	1	0	0	0	78
417	44	0	T1	0	0	1	1	0	0	78
418	50	0	T1	0	0	1	1	0	0	55
419	38	0	T1	0	0	1	1	0	0	154
420	65	1	T1	1	0	1	1	0	0	91
421	51	1	T2	0	1	0	1	0	0	112
422	70	1	T1	0	0	0	1	0	0	81
423	41	0	T1	0	0	0	0	0	0	59
424	66	1	T1	0	0	1	0	0	0	69
425	38	0	T1	1	0	1	1	0	0	93
426	46	0	T1	0	0	0	1	0	0	114
427	44	0	T2	0	1	1	1	0	0	69
428	51	1	T1	0	0	1	1	0	0	128
429	50	0	T2	1	0	1	1	0	0	97
430	48	0	T1	0	1	1	1	0	0	89
431	50	0	T2	0	1	1	1	0	0	92
432	43	0	T2	0	1	1	1	0	0	92
433	46	0	T2	1	0	0	1	0	0	95
434	50	0	T1	0	1	1	1	0	0	138
435	37	0	T1	0	0	1	0	0	0	81
436	50	0	T2	0	0	1	0	0	0	107
437	53	1	T3	0	0	0	1	0	0	92
438	46	0	T2	0	0	1	1	0	0	80
439	56	1	T2	1	0	1	1	0	0	134
440	63	1	T1	0	0	1	1	0	0	115
441	53	1	T1	0	0	1	0	0	0	79
442	51	1	T1	1	1	0	1	0	0	91
443	33	0	T1	0	0	1	1	0	0	104
444	79	1	T1	0	0	1	1	0	0	78
445	55	1	T1	1	0	0	0	0	0	88
446	35	0	T1	0	0	1	0	0	0	100
447	37	0	T1	0	0	1	1	0	0	85
448	62	1	T1	0	0	1	0	0	0	96
449	51	1	T1	0	0	1	1	0	0	89
450	41	0	T1	0	0	1	0	0	0	78
451	42	0	T2	0	1	1	1	0	0	83
452	72	1	T1	0	0	1	1	0	0	90
453	50	0	T1	0	1	1	0	0	0	74
454	42	0	T3	1	1	1	1	0	0	90
455	53	1	T2	0	1	0	1	0	0	78
456	38	0	T1	0	1	1	0	1	liver metastasis in May, 2016	69
457	46	0	T2	1	1	0	1	0	0	90
458	72	1	T2	0	0	1	1	0	0	124
459	72	1	T1	0	1	1	1	0	0	74
460	54	1	T2	0	1	1	1	0	0	77
461	44	0	T2	0	1	1	0	0	0	86
462	73	1	T2	0	0	1	1	0	0	84
463	41	0	T1	0	0	1	1	0	0	89
464	48	0	T2	0	0	0	0	0	0	61
465	50	0	T1	0	0	1	1	0	0	98
466	33	0	T1	0	0	1	0	0	0	78
467	47	0	T1	0	1	1	0	0	0	113
468	43	0	T2	0	0	1	1	0	0	57
469	80	1	T1	0	0	0	1	0	0	58
470	51	1	T2	1	0	0	0	0	0	103
471	44	0	T1	0	0	1	1	0	0	133
472	26	0	T2	0	0	1	0	0	0	78
473	44	0	T2	0	1	0	0	0	0	106
474	34	0	T2	0	0	0	1	0	0	96
475	50	0	T2	0	1	0	1	0	0	69
476	37	0	T2	0	0	1	1	0	0	109
477	42	0	T2	0	1	1	1	0	0	165
478	46	0	T2	1	1	1	1	0	0	77
479	44	0	T1	0	0	1	1	0	0	110
480	50	0	T1	0	0	0	1	0	0	78
481	65	1	T1	0	0	1	1	0	0	86
482	53	1	T1	0	1	1	1	0	0	77
483	62	1	T1	0	1	0	1	0	0	112
484	58	1	T2	0	0	0	0	0	0	101
485	45	0	T2	0	1	1	1	0	0	57
486	66	1	T1	0	0	1	0	0	0	100
487	45	0	T2	0	0	1	1	0	0	88
488	78	1	T1	0	0	1	1	0	0	112
489	43	0	T2	1	1	0	0	0	0	80
490	60	1	T2	0	1	0	1	0	0	88
491	53	1	T2	0	0	0	0	0	0	83
492	40	0	T1	0	0	0	1	0	0	87
493	35	0	T1	0	1	1	1	0	0	61
494	50	0	T2	0	0	1	1	0	0	82
495	71	1	T1	0	0	1	1	0	0	95
496	30	0	T1	0	1	0	1	0	0	88
497	56	1	T2	0	0	1	0	0	0	130
498	49	0	T2	0	1	1	1	0	0	78
499	43	0	T1	0	0	1	0	0	0	75
500	48	0	T2	1	1	1	1	0	0	79
501	46	0	T2	0	0	1	1	0	0	87
502	74	1	T2	0	0	0	1	0	0	63
503	43	0	T2	0	1	1	1	0	0	62
504	46	0	T2	1	0	0	0	0	0	74
505	45	0	T1	0	0	1	1	0	0	101
506	63	1	T2	0	0	0	0	0	0	99
507	43	0	T2	0	0	0	0	0	0	76
508	47	0	T1	0	0	1	0	0	0	164
509	43	0	T2	0	1	0	1	0	0	95
510	49	0	T1	0	0	1	0	0	0	131
511	49	0	T2	0	0	1	1	0	0	87
512	49	0	T1	0	1	1	1	0	0	80
513	49	0	T1	0	0	1	0	0	0	69
514	38	0	T2	0	1	0	1	0	0	87
515	58	1	T1	0	0	1	1	0	0	87
516	67	1	T1	0	0	1	1	0	0	80
517	34	0	T1	0	0	1	0	0	0	143
518	62	1	T1	0	0	1	1	0	0	60
519	58	1	T1	1	0	1	1	0	0	87
520	47	0	T1	1	0	1	0	0	0	89
521	71	1	T1	0	0	1	0	0	0	86
522	79	1	T1	1	0	1	1	0	0	103
523	41	0	T1	1	0	1	1	0	0	86
524	55	1	T2	0	0	1	1	0	0	99
525	51	1	T1	0	0	1	1	0	0	78
526	46	0	T2	0	0	1	0	0	0	93
527	51	1	T2	0	0	1	0	0	0	148
528	47	0	T2	1	0	0	1	0	0	107
529	52	1	T1	0	0	0	1	0	0	71
530	71	1	T2	0	0	1	0	0	0	81
531	40	0	T2	1	1	0	1	0	0	86
532	56	1	T1	0	0	1	0	0	0	64
533	47	0	T1	0	1	1	1	0	0	104
534	48	0	T2	0	0	1	1	0	0	69
535	59	1	T2	0	0	1	0	0	0	146
536	52	1	T1	0	0	1	0	0	0	129
537	45	0	T1	0	0	0	0	0	0	117
538	77	1	T1	0	1	0	1	0	0	85
539	65	1	T2	1	0	1	1	0	0	76
540	65	1	T1	0	1	1	1	0	0	85
541	62	1	T1	0	0	1	1	0	0	149
542	67	1	T1	0	0	0	0	0	0	67
543	41	0	T1	0	0	1	0	0	0	117
544	40	0	T2	0	0	1	0	0	0	126
545	62	1	T2	0	0	1	0	0	0	125
546	58	1	T2	0	1	1	1	0	0	89
547	37	0	T1	0	0	1	0	0	0	68
548	59	1	T1	0	1	1	0	0	0	68
549	68	1	T2	0	0	1	0	0	0	68
550	72	1	T2	0	0	1	0	0	0	85
551	62	1	T2	0	0	1	1	0	0	99
552	51	1	T1	0	0	0	1	0	0	84
553	61	1	T2	0	0	1	0	0	0	68
554	38	0	T2	0	0	1	1	0	0	84
555	60	1	T1	0	0	0	0	0	0	82
556	27	0	T3	0	1	0	0	0	0	85
557	62	1	T2	0	0	0	1	0	0	84
558	47	0	T1	0	0	1	1	0	0	64
559	55	1	T2	0	0	1	0	0	0	123
560	49	0	T1	0	0	1	1	0	0	78
561	45	0	T1	0	0	0	1	1	local recurrence in December, 2020	103
562	43	0	T1	0	1	1	0	0	0	96
563	37	0	T1	0	1	1	1	0	0	69
564	64	1	T2	0	0	0	0	0	0	73
565	57	1	T2	0	1	0	1	0	0	107
566	34	0	T2	0	1	1	1	0	0	66
567	44	0	T2	0	0	1	1	0	0	83
568	37	0	T2	0	1	0	1	0	0	72
569	56	1	T2	0	1	0	0	0	0	82
570	56	1	T1	0	0	0	0	0	0	166
571	67	1	T1	0	1	1	1	0	0	67
572	46	0	T1	0	1	1	1	0	0	77
573	45	0	T1	1	0	1	1	0	0	83
574	51	1	T1	0	0	1	0	0	0	62
575	43	0	T1	0	1	0	1	0	0	103
576	31	0	T2	0	1	1	1	0	0	82
577	42	0	T2	0	0	1	1	0	0	77
578	50	0	T2	0	1	1	1	0	0	111
579	59	1	T1	0	0	0	1	0	0	82
580	41	0	T3	0	0	0	1	0	0	82
581	48	0	T2	1	1	1	1	1	brain metastasis in August, 2018	87
582	44	0	T2	0	0	1	0	0	0	131
583	49	0	T1	0	0	1	0	0	0	120
584	41	0	T2	0	1	0	0	0	0	82
585	52	1	T1	0	1	0	0	0	0	121
586	60	1	T1	0	1	0	1	0	0	94
587	60	1	T1	0	0	0	0	0	0	87
588	54	1	T1	1	0	0	1	0	0	72
589	66	1	T2	1	0	0	0	0	0	58
590	54	1	T1	0	1	1	1	0	0	78
591	47	0	T2	1	0	1	1	0	0	68
592	46	0	T2	0	0	0	1	0	0	67
593	46	0	T2	1	1	1	1	0	0	70
594	59	1	T1	0	0	1	1	0	0	71
595	46	0	T2	0	0	1	1	0	0	84
596	68	1	T1	0	0	1	0	0	0	80
597	59	1	T3	0	0	0	1	0	0	81
598	44	0	T1	0	0	0	1	0	0	81
599	43	0	T1	0	0	1	1	0	0	74
600	43	0	T1	0	0	1	0	0	0	91
601	49	0	T1	0	0	1	1	0	0	148
602	44	0	T1	0	0	1	1	0	0	78
603	51	1	T1	0	0	0	1	0	0	73
604	63	1	T2	0	1	0	1	0	0	71
605	46	0	T2	0	0	1	1	0	0	79
606	55	1	T1	0	1	1	0	0	0	118
607	42	0	T1	0	0	1	0	0	0	117
608	80	1	T2	1	1	1	1	0	0	65
609	45	0	T2	0	0	1	0	0	0	137
610	60	1	T2	0	0	0	1	0	0	60
611	51	1	T1	0	0	1	0	0	0	112
612	48	0	T1	0	0	0	0	0	0	116
613	36	0	T1	0	0	0	1	0	0	73
614	54	1	T1	0	0	1	1	0	0	63
615	66	1	T2	0	0	1	0	0	0	97
616	61	1	T1	0	0	0	1	0	0	68
617	74	1	T1	0	0	1	1	0	0	67
618	61	1	T1	0	1	0	1	0	0	101
619	68	1	T2	1	1	1	1	0	0	61
620	49	0	T1	0	0	1	1	0	0	63
621	51	1	T1	0	0	1	1	0	0	67
622	48	0	T2	0	0	0	1	0	0	99
623	68	1	T1	0	0	1	1	0	0	111
624	49	0	T1	0	0	1	1	0	0	121
625	44	0	T1	0	0	1	1	0	0	93
626	52	1	T1	0	1	1	0	0	0	84
627	52	1	T1	0	1	0	0	0	0	117
628	51	1	T1	0	0	1	0	0	0	116
629	61	1	T1	0	0	1	0	0	0	84
630	45	0	T1	0	0	1	1	0	0	136
631	49	0	T2	0	0	0	1	0	0	176
632	48	0	T2	0	1	0	1	0	0	63
633	42	0	T1	0	1	0	0	0	0	114
634	45	0	T1	0	0	1	1	0	0	88
635	49	0	T1	0	1	0	1	0	0	79
636	64	1	T1	0	0	0	1	0	0	63
637	45	0	T1	0	0	0	1	0	0	65
638	46	0	T1	1	1	0	0	0	0	80
639	57	1	T2	0	0	0	0	0	0	79
640	54	1	T1	0	0	1	1	0	0	165
641	45	0	T3	0	0	0	1	0	0	158
642	34	0	T2	0	1	1	1	1	abdominal cavity in December, 2017	34
643	41	0	T1	0	0	1	1	0	0	92
644	43	0	T1	0	0	1	1	0	0	155
645	43	0	T1	0	0	1	0	0	0	110
646	44	0	T1	0	0	1	1	0	0	89
647	43	0	T1	0	0	0	1	0	0	100
648	58	1	T3	0	0	0	1	0	0	78
649	56	1	T2	1	1	1	1	0	0	105
650	50	0	T1	1	0	0	1	0	0	92
651	45	0	T1	0	1	1	1	0	0	91
652	38	0	T2	0	1	0	1	0	0	59
653	52	1	T1	0	0	0	1	0	0	68
654	46	0	T1	1	0	1	1	0	0	98
655	39	0	T3	0	1	0	0	0	0	111
656	43	0	T1	0	0	1	1	0	0	91
657	50	0	T2	0	1	0	1	0	0	89
658	48	0	T2	0	0	1	1	0	0	94
659	50	0	T2	0	0	1	0	0	0	108
660	64	1	T3	0	0	1	1	0	0	58
661	57	1	T1	0	0	1	1	0	0	85
662	51	1	T2	1	1	0	1	0	0	88
663	61	1	T1	0	0	1	1	0	0	81
664	31	0	T1	0	0	1	0	0	0	110
665	64	1	T2	0	0	1	1	0	0	72
666	56	1	T1	0	1	0	0	1	abdominal cavity in July, 2020	63
667	43	0	T2	0	0	0	1	0	0	89
668	39	0	T2	0	0	0	1	0	0	89
669	48	0	T2	0	1	0	1	0	0	91
670	73	1	T1	0	1	0	1	0	0	149
671	41	0	T3	1	0	1	0	0	0	88
672	55	1	T2	0	0	1	0	0	0	108
673	47	0	T1	1	0	0	1	0	0	115
674	59	1	T1	0	1	0	1	0	0	141
675	49	0	T2	0	0	1	1	0	0	63
676	58	1	T1	0	0	0	1	0	0	103
677	45	0	T2	0	0	1	1	0	0	83
678	43	0	T2	0	0	1	1	0	0	77
679	45	0	T2	0	1	1	1	0	0	104
680	39	0	T1	0	0	0	1	0	0	67
681	77	1	T1	0	0	0	1	0	0	77
682	39	0	T1	0	0	0	1	0	0	88
683	47	0	T2	0	0	0	1	0	0	75
684	35	0	T1	0	1	0	1	0	0	77
685	42	0	T2	0	0	1	1	0	0	112
686	43	0	T1	0	0	1	1	0	0	97
687	70	1	T1	0	0	0	1	0	0	90
688	38	0	T2	0	0	1	1	0	0	111
689	45	0	T1	0	1	0	1	0	0	79
690	61	1	T1	0	0	1	1	0	0	78
691	36	0	T1	0	0	1	1	0	0	79
692	44	0	T1	0	0	1	1	0	0	77
693	73	1	T2	0	0	1	1	0	0	142
694	42	0	T1	0	0	0	1	0	0	77
695	55	1	T1	0	0	0	1	0	0	63
696	46	0	T2	0	1	0	1	0	0	77
697	41	0	T2	0	0	0	1	0	0	63
698	43	0	T1	0	0	1	1	0	0	136
699	52	1	T2	0	0	1	1	0	0	113
700	59	1	T1	0	0	0	1	0	0	136
701	44	0	T1	0	1	0	1	0	0	86
702	50	0	T2	0	1	0	1	0	0	77
703	47	0	T1	0	0	1	1	0	0	81
704	49	0	T1	0	0	0	1	0	0	78
705	39	0	T1	0	0	0	1	0	0	87
706	65	1	T2	0	1	0	1	0	0	121
707	29	0	T1	0	0	0	1	0	0	105
708	48	0	T1	0	0	0	1	0	0	63
709	50	0	T1	1	1	1	1	0	0	79
710	61	1	T2	1	0	1	1	0	0	62
711	51	1	T2	0	0	0	1	0	0	78
712	75	1	T1	0	0	1	0	0	0	91
713	36	0	T1	0	0	1	1	0	0	67
714	56	1	T2	0	0	1	1	0	0	101
715	57	1	T1	0	0	1	1	0	0	61
716	27	0	T1	0	0	1	1	0	0	80
717	66	1	T1	0	0	1	1	0	0	63
718	61	1	T1	1	0	0	1	0	0	60
719	49	0	T3	1	1	0	1	0	0	77
720	43	0	T1	0	1	1	1	0	0	73
721	62	1	T1	0	1	1	0	0	0	60
722	60	1	T2	0	0	1	0	0	0	79
723	49	0	T1	0	0	0	0	0	0	87
724	43	0	T2	1	1	1	1	0	0	92
725	47	0	T1	1	1	1	1	0	0	88
726	60	1	T1	0	1	1	1	0	0	99
727	39	0	T1	0	1	1	1	0	0	92
728	49	0	T1	0	0	1	1	0	0	62
729	46	0	T1	0	1	0	1	0	0	88
730	34	0	T2	0	1	0	1	0	0	73
731	51	1	T2	0	1	0	1	0	0	75
732	60	1	T1	0	1	1	1	0	0	69
733	48	0	T2	0	1	0	1	0	0	83
734	73	1	T2	0	0	0	1	0	0	75
735	40	0	T1	0	0	1	0	0	0	107
736	50	0	T1	0	0	1	1	0	0	75
737	37	0	T1	0	0	1	1	0	0	123
738	64	1	T1	0	1	0	1	0	0	78
739	59	1	T2	0	1	1	0	1	liver metastasis in March, 2021	105
740	59	1	T1	0	1	1	1	0	0	66
741	52	1	T1	0	1	0	1	0	0	112
742	50	0	T1	0	0	0	1	0	0	62
743	46	0	T2	0	0	1	0	0	0	108
744	39	0	T2	0	0	1	1	0	0	66
745	45	0	T1	0	0	1	1	0	0	106
746	49	0	T1	0	0	1	1	0	0	88
747	50	0	T2	0	0	1	0	0	0	105
748	33	0	T1	0	0	1	1	0	0	72
749	55	1	T2	0	0	1	1	0	0	81
750	61	1	T1	0	0	1	0	0	0	79
751	42	0	T2	0	1	1	1	0	0	72
752	41	0	T1	0	0	1	1	0	0	72
753	49	0	T1	0	0	1	1	0	0	64
754	44	0	T2	0	1	0	1	0	0	72
755	49	0	T1	0	1	0	1	0	0	104
756	33	0	T2	0	1	0	1	0	0	105
757	41	0	T1	0	0	1	0	0	0	65
758	51	1	T1	0	0	1	1	0	0	95
759	32	0	T1	1	0	1	1	0	0	67
760	41	0	T1	0	0	1	1	0	0	98
761	58	1	T1	0	0	1	1	0	0	65
762	52	1	T1	0	0	1	1	0	0	87
763	57	1	T2	0	1	0	1	0	0	100
764	46	0	T3	0	1	0	0	0	0	118
765	52	1	T1	0	0	0	1	0	0	101
766	37	0	T1	0	0	0	1	0	0	96
767	50	0	T2	0	0	1	1	0	0	107
768	42	0	T2	0	1	1	1	0	0	78
769	50	0	T1	0	0	1	1	0	0	102
770	44	0	T2	0	1	1	1	0	0	62
771	56	1	T2	1	1	0	1	1	local recurrence in May, 2017	68
772	50	0	T1	1	0	0	1	0	0	72
773	52	1	T3	0	0	1	1	0	0	105
774	40	0	T2	0	1	1	1	0	0	102
775	51	1	T1	0	1	0	1	0	0	60
776	42	0	T2	0	0	1	1	0	0	80
777	69	1	T1	0	0	1	1	0	0	73
778	50	0	T1	0	0	1	0	0	0	64
779	49	0	T1	0	0	1	1	0	0	64
780	35	0	T1	0	1	0	1	0	0	72
781	54	1	T1	0	0	0	1	0	0	63
782	49	0	T1	0	0	0	1	0	0	75
783	47	0	T1	0	0	0	1	0	0	72
784	46	0	T1	0	1	1	1	0	0	77
785	50	0	T1	1	0	0	1	0	0	115
786	54	1	T3	0	1	0	0	0	0	80
787	50	0	T2	0	1	1	1	0	0	111
788	71	1	T1	1	0	1	1	0	0	87
789	61	1	T1	0	1	0	1	0	0	138
790	64	1	T1	0	1	0	1	0	0	76
791	50	0	T1	0	0	0	1	0	0	77
792	58	1	T1	0	0	1	1	0	0	79
793	40	0	T1	0	0	1	1	0	0	72
794	52	1	T1	0	0	0	1	0	0	165
795	56	1	T2	0	0	1	1	0	0	57
796	47	0	T2	0	1	0	1	0	0	72
797	62	1	T1	0	0	1	0	0	0	63
798	44	0	T2	0	0	1	1	0	0	93
799	52	1	T1	0	0	0	1	0	0	71
800	52	1	T2	0	1	0	1	0	0	71
801	60	1	T1	0	0	0	1	0	0	71
802	41	0	T2	0	0	1	1	0	0	62
803	45	0	T2	0	0	1	0	0	0	79
804	55	1	T1	1	1	0	1	0	0	87
805	53	1	T1	0	0	1	0	0	0	61
806	47	0	T1	0	0	0	1	0	0	75
807	38	0	T2	0	0	0	1	0	0	83
808	35	0	T1	0	0	0	0	0	0	61
809	51	1	T2	0	1	1	1	0	0	71
810	41	0	T1	0	1	0	1	0	0	81
811	63	1	T1	0	0	1	1	0	0	61
812	51	1	T2	0	0	0	1	0	0	162
813	51	1	T1	0	0	0	1	0	0	70
814	46	0	T2	0	0	0	1	0	0	61
815	73	1	T2	0	0	1	1	0	0	70
816	57	1	T1	0	0	1	1	0	0	70
817	45	0	T1	0	0	0	1	0	0	70
818	53	1	T2	0	0	0	1	0	0	160
819	69	1	T1	0	0	1	1	0	0	70
820	77	1	T1	0	0	0	1	0	0	70
821	39	0	T1	0	0	0	1	0	0	70
822	41	0	T2	0	0	1	1	0	0	56
823	48	0	T1	0	0	1	1	0	0	69
824	47	0	T1	0	0	1	1	0	0	70
825	49	0	T2	0	0	1	1	0	0	98
826	81	1	T2	0	0	1	1	0	0	66
827	60	1	T2	0	0	0	1	0	0	57
828	72	1	T2	0	1	0	1	0	0	98
829	59	1	T1	0	0	0	1	0	0	99
830	51	1	T1	0	1	1	0	0	0	69
831	37	0	T3	0	0	0	1	0	0	75
832	55	1	T2	0	1	0	1	0	0	62
833	56	1	T2	0	1	0	0	0	0	69
834	47	0	T1	0	0	1	0	0	0	157
835	58	1	T2	0	1	0	1	0	0	69
836	36	0	T2	0	0	0	1	0	0	93
837	47	0	T2	0	0	1	1	0	0	1459
838	60	1	T1	0	0	0	1	0	0	69
839	46	0	T1	0	0	1	1	0	0	147
840	64	1	T1	0	1	1	1	0	0	71
841	51	1	T2	0	0	1	1	0	0	95
842	45	0	T2	0	0	1	1	0	0	68
843	46	0	T2	0	0	0	1	0	0	56
844	59	1	T2	0	1	0	1	0	0	69
845	58	1	T2	0	0	1	1	0	0	105
846	34	0	T2	0	0	1	1	0	0	139
847	45	0	T2	0	0	1	1	0	0	71
848	45	0	T2	0	0	0	1	0	0	94
849	60	1	T1	0	0	1	0	0	0	140
850	45	0	T1	0	0	0	1	0	0	60
851	50	0	T1	0	0	1	1	0	0	79
852	42	0	T2	0	0	1	1	0	0	110
853	50	0	T1	0	0	0	1	0	0	93
854	44	0	T2	0	0	1	1	0	0	130
855	53	1	T2	0	0	0	1	0	0	76
856	64	1	T1	0	0	1	1	0	0	58
857	66	1	T2	0	0	0	1	0	0	93
858	50	0	T1	1	0	1	1	0	0	62
859	52	1	T2	1	1	0	1	0	0	101
860	50	0	T1	0	0	1	0	0	0	130
861	49	0	T3	1	0	0	1	1	liver metastasis in December, 2017	93
862	48	0	T2	0	0	1	0	0	0	89
863	52	1	T2	0	1	0	1	0	0	74
864	45	0	T2	0	0	0	0	0	0	74
865	39	0	T1	0	0	0	1	0	0	90
866	61	1	T1	0	0	0	1	0	0	68
867	43	0	T1	0	0	0	1	0	0	68
868	43	0	T1	0	1	0	0	0	0	124
869	59	1	T1	0	0	1	1	0	0	72
870	53	1	T2	0	0	0	1	0	0	62
871	46	0	T1	0	0	0	1	0	0	64
872	48	0	T2	0	1	0	0	0	0	124
873	49	0	T1	0	0	1	1	0	0	70
874	44	0	T1	0	1	0	1	0	0	79
875	41	0	T1	0	0	0	1	0	0	89
876	60	1	T2	0	1	1	0	0	0	85
877	55	1	T1	0	0	1	1	0	0	106
878	46	0	T1	0	0	1	1	0	0	61
879	43	0	T2	0	0	1	1	0	0	120
880	57	1	T3	0	1	0	1	0	0	78
881	39	0	T2	0	0	0	1	0	0	100
882	59	1	T2	0	0	1	1	0	0	87
883	55	1	T2	0	0	1	1	0	0	85
884	42	0	T2	0	1	1	1	0	0	79
885	43	0	T1	0	0	1	1	1	contralateral DCIS in April, 2019	107
886	56	1	T1	0	0	0	1	0	0	77
887	54	1	T1	0	0	0	1	0	0	84
888	43	0	T1	0	0	1	1	0	0	77
889	61	1	T1	0	0	0	0	0	0	122
890	69	1	T1	0	0	1	1	0	0	80
891	61	1	T2	0	0	0	1	0	0	75
892	37	0	T1	1	1	0	1	0	0	73
893	50	0	T1	0	0	1	1	0	0	84
894	46	0	T1	0	0	1	1	0	0	122
895	43	0	T3	0	0	0	1	0	0	66
896	64	1	T1	0	0	0	0	0	0	66
897	59	1	T2	0	0	0	1	0	0	73
898	56	1	T2	0	0	0	0	0	0	86
899	64	1	T2	0	1	0	1	0	0	65
900	36	0	T1	1	1	0	1	0	0	88
901	46	0	T2	0	1	0	1	0	0	79
902	43	0	T1	0	0	0	1	0	0	78
903	58	1	T2	0	0	1	1	0	0	65
904	37	0	T2	0	0	0	1	0	0	65
905	59	1	T2	0	1	1	0	0	0	65
906	46	0	T1	0	0	1	0	0	0	65
907	61	1	T1	0	0	1	1	0	0	67
908	39	0	T2	0	0	0	1	0	0	84
909	58	1	T2	0	0	1	1	0	0	65
910	31	0	T2	0	0	1	1	0	0	74
911	40	0	T2	0	0	0	1	0	0	84
912	66	1	T1	0	0	1	1	0	0	65
913	43	0	T1	0	1	0	1	0	0	65
914	28	0	T3	0	0	1	1	0	0	77
915	46	0	T1	0	0	1	1	0	0	84
916	52	1	T1	0	1	1	1	0	0	89
917	62	1	T1	0	0	0	1	0	0	80
918	61	1	T1	0	1	1	1	0	0	65
919	55	1	T1	1	0	0	1	0	0	64
920	55	1	T2	0	1	0	1	0	0	101
921	51	1	T1	0	0	1	1	0	0	82
922	47	0	T1	0	0	1	1	0	0	62
923	69	1	T1	0	0	1	1	0	0	74
924	44	0	T1	0	0	0	1	0	0	74
925	62	1	T1	0	0	1	0	0	0	64
926	38	0	T1	0	1	1	1	0	0	68
927	61	1	T1	0	0	1	1	0	0	65
928	40	0	T1	0	0	0	1	0	0	73
929	77	1	T2	0	0	1	0	0	0	64
930	51	1	T2	1	0	0	0	0	0	64
931	67	1	T2	1	1	1	1	0	0	106
932	52	1	T1	0	1	1	0	0	0	72
933	53	1	T1	0	1	0	1	0	0	63
934	46	0	T1	0	0	0	1	0	0	61
935	58	1	T1	0	1	0	1	0	0	90
936	55	1	T2	0	1	1	1	0	0	122
937	48	0	T1	0	1	0	1	0	0	72
938	31	0	T1	0	0	1	1	0	0	96
939	55	1	T2	0	1	0	1	0	0	88
940	44	0	T1	0	1	0	0	0	0	122
941	47	0	T1	0	1	0	0	0	0	85
942	80	1	T2	0	1	1	1	0	0	103
943	53	1	T2	0	0	1	1	0	0	75
944	47	0	T2	0	0	1	1	0	0	73
945	41	0	T1	0	0	1	0	0	0	63
946	36	0	T1	0	0	1	0	0	0	63
947	48	0	T2	0	1	0	1	0	0	125
948	44	0	T2	0	0	0	1	0	0	99
949	71	1	T2	0	0	0	1	0	0	79
950	69	1	T2	1	0	0	1	0	0	88
951	49	0	T1	0	0	1	1	0	0	72
952	50	0	T1	0	0	1	1	0	0	63
953	55	1	T1	0	0	1	1	0	0	63
954	68	1	T3	0	0	0	1	0	0	121
955	57	1	T2	1	0	0	1	0	0	62
956	55	1	T1	0	1	0	0	0	0	62
957	44	0	T1	0	1	0	1	0	0	87
958	45	0	T1	0	1	0	1	0	0	62
959	65	1	T1	0	0	1	1	0	0	62
960	57	1	T1	0	0	1	1	0	0	80
961	48	0	T1	0	0	1	1	0	0	77
962	40	0	T1	0	0	1	1	0	0	87
963	40	0	T1	0	0	1	0	0	0	84
964	52	1	T1	0	0	0	1	0	0	77
965	44	0	T3	0	1	0	1	0	0	62
966	38	0	T1	0	0	0	1	0	0	78
967	43	0	T2	0	0	1	1	0	0	72
968	49	0	T2	0	0	0	0	0	0	93
969	46	0	T3	0	0	0	1	0	0	72
970	64	1	T1	0	0	1	1	0	0	77
971	44	0	T1	0	0	1	1	0	0	77
972	46	0	T2	0	0	1	1	0	0	97
973	45	0	T2	0	1	1	1	0	0	61
974	54	1	T2	1	1	0	1	0	0	55
975	43	0	T2	0	0	1	0	0	0	61
976	47	0	T1	0	0	0	0	0	0	96
977	43	0	T2	0	0	0	0	0	0	90
978	55	1	T1	1	0	1	1	0	0	97
979	49	0	T1	1	0	0	1	0	0	61
980	64	1	T1	0	0	1	0	0	0	111
981	54	1	T1	0	0	1	1	0	0	110
982	44	0	T1	0	0	0	1	0	0	104
983	53	1	T3	0	0	1	0	0	0	61
984	40	0	T2	0	0	1	1	0	0	61
985	46	0	T2	0	1	0	1	0	0	75
986	48	0	T1	0	0	0	1	0	0	61
987	43	0	T1	0	0	1	1	0	0	146
988	47	0	T1	0	0	0	1	0	0	61
989	57	1	T1	1	0	0	1	0	0	98
990	48	0	T3	0	0	1	1	0	0	91
991	52	1	T2	0	1	0	0	0	0	135
992	36	0	T2	0	1	0	1	0	0	60
993	40	0	T2	0	1	1	1	0	0	60
994	52	1	T1	0	0	1	1	0	0	77
995	56	1	T1	0	0	0	1	0	0	65
996	45	0	T2	0	0	1	0	0	0	60
997	42	0	T2	0	1	0	1	0	0	60
998	48	0	T2	0	0	0	1	0	0	71
999	69	1	T1	0	0	1	1	0	0	73
1000	48	0	T1	1	0	1	1	0	0	69
1001	42	0	T2	0	0	0	1	0	0	73
1002	47	0	T2	0	1	1	1	0	0	88
1003	53	1	T3	0	1	0	1	0	0	93
1004	52	1	T2	0	1	1	1	0	0	73
1005	41	0	T2	0	0	0	1	0	0	72
1006	41	0	T1	0	1	0	0	0	0	103
1007	66	1	T1	0	1	1	1	0	0	110
