# Supplementary material for: Efficacy and safety of endocrine therapy after mastectomy in patients with hormone receptor positive breast ductal carcinoma in situ: Retrospective cohort study
Source: eLife. 2023 Feb 6;12:e83045. doi: 10.7554/eLife.83045 (PMC9901931; doi:10.7554/eLife.83045)
Supplement: Figure 3—source data 1. [file elife-83045-fig3-data1.xlsx]

## Sheet: Sheet1
No.	ET	Adverse events
1	1	endometrial thickening
2	0
3	0
4	0
5	0
6	1	joint pain；increased vaginal discharge
7	1
8	0
9	1	osteoporosis,ulna fracture in 2018
10	1	elevated hepatic transaminases
11	1	osteoporosis
12	0
13	0
14	1	endometrial thickening
15	0
16	1
17	1	joint pain
18	0
19	1
20	0
21	0
22	1	joint pain
23	0
24	1
25	1
26	0
27	0
28	1	joint pain；osteoporosis；hypertension；Hyperlipidemia
29	1
30	1	coronary heart disease
31	1
32	1
33	0
34	0
35	1	joint pain
36	0
37	1
38	0
39	1
40	1	joint pain；endometrial thickening
41	1
42	1
43	1
44	1	hypertension
45	1	osteoporosis
46	1
47	1
48	1	stomachache
49	1
50	1
51	1	acid reflux
52	1
53	1
54	1
55	1	joint pain
56	1
57	1	abnormal liver function
58	1	hot flashes，endometrial thickening
59	1
60	0
61	1	endometrial thickening
62	1
63	0
64	1	joint pain
65	0
66	1
67	1
68	1
69	1	discomfort of the whole body
70	1	hypertension；Hyperlipidemia
71	1
72	1
73	1
74	1
75	0
76	1
77	1
78	1
79	0
80	1
81	1	nausea
82	1
83	1
84	1
85	1	flatulence
86	1
87	1
88	1	uterine Leiomyoma，hysterectomy
89	0	joint pain；diabetes
90	1	osteoporosis
91	1
92	1	stomachache
93	1
94	1
95	1
96	1
97	1
98	0
99	0
100	1
101	0	hypertension
102	0
103	1
104	1
105	1
106	1	osteoporosis
107	0
108	1
109	1
110	1
111	1
112	1	osteoporosis；joint pain
113	1
114	1
115	1
116	1
117	0
118	1
119	1	osteoporosis；bone pain
120	1
121	1
122	1
123	1	osteoporosis
124	1
125	1	coronary heart disease；dyslipidemia；hot flashes
126	0
127	1
128	1
129	1	osteoporosis
130	1
131	1
132	1
133	1
134	1
135	1
136	1
137	1
138	1	osteoporosis；hyperlipidemia
139	1
140	0	fatigue，hyperhidrosis
141	1	osteoporosis
142	1	endometrial thickening
143	1
144	1
145	0
146	1
147	1	joint pain
148	1
149	1
150	1
151	1
152	1	joint pain
153	1
154	1
155	1
156	1	joint swelling, dyspepsia, hot flashes
157	1
158	1
159	1
160	0
161	1
162	1
163	1
164	1
165	1
166	0
167	1
168	1
169	1
170	1
171	1
172	1
173	0
174	0
175	0
176	0	endometrial polyp
177	1
178	0
179	1
180	1	flatulence
181	1
182	1
183	1
184	1
185	1
186	0
187	1
188	1
189	1
190	1	joint pain
191	1
192	0
193	1	abnormal liver function；vaginitis
194	1
195	1
196	1	endometrial thickening
197	1
198	1	Hyperlipidemia
199	1	breast adenoma
200	0	hot flashes；hyperhidrosis
201	1
202	1
203	1
204	1
205	1	vaginitis, irregular menstrual
206	1
207	1
208	1
209	1	discomfort in the whole body, hot flashes
210	1
211	1	endometrial thickening；hyperhidrosis；hot flashes；joint pain；hypocalcemia
212	1
213	1	breast pain and swelling
214	1
215	0
216	1
217	1
218	0
219	1
220	1
221	1	joint pain
222	1	endometrial thickening
223	1
224	1
225	1	joint pain
226	1	alopecia；joint pain；endometrial thickening；hot flashes
227	1
228	1
229	1
230	0
231	1
232	1
233	0
234	1
235	1	edema, weight gain
236	1
237	1
238	1	brain infarction, hyperlipidemia
239	1
240	0	hyperhidrosis；fatigue
241	1
242	1
243	1
244	1	blurred vision
245	1
246	0	hysterectomy
247	1
248	1
249	1
250	1
251	1	diabetes, joint pain
252	0
253	0
254	1	joint pain；endometrial thickening
255	1
256	1
257	1
258	1
259	1
260	1
261	1
262	1
263	1
264	1
265	1
266	1	osteoporosis
267	1
268	1	Hyperlipidemia, abdominal pain, endometrial thickening
269	1
270	1
271	1
272	1
273	1
274	0
275	1	osteoporosis；joint pain
276	1
277	0
278	1
279	1
280	1
281	1
282	1
283	0
284	1
285	0	heart trouble
286	1
287	0
288	1
289	0
290	1
291	0	thyrophyma
292	1
293	1
294	1
295	1
296	1	fatty liver disease；abnormal liver function；Hyperlipidemia；hot flashes
297	1
298	1
299	1
300	1
301	0
302	1
303	0
304	1
305	1
306	1
307	1
308	1
309	1	endometrial thickening
310	1
311	0
312	1
313	0
314	1
315	1
316	1
317	1
318	1
319	1	osteoporosis；joint pain；fatty liver disease；endometrial thickening；Hyperlipidemia
320	1	osteoporosis；joint pain；endometrial thickening，hysterectomy
321	1
322	1
323	1	endometrial thickening
324	0
325	1	dyslipidemia；endometrial thickening
326	1	hypertension；Hyperlipidemia
327	1
328	1
329	0
330	0
331	1	endometrial thickening
332	1	endometrial thickening
333	0
334	1
335	1	heart trouble, dryness of vaginal mucosa
336	1
337	1	joint pain；dyslipidemia
338	1
339	1	hyperhidrosis
340	1
341	1	menopause
342	1
343	1
344	0
345	1
346	1
347	1
348	1
349	0
350	0
351	0
352	1
353	1
354	1
355	1
356	0
357	1	joint pain
358	1	endometrial thickening
359	1
360	1
361	1
362	1
363	0
364	1	irregular menstrual, endometrial thickening；joint pain, hands and feer numbness
365	1
366	1
367	1
368	1
369	1	hands and feet numbness
370	1	sense of hunger
371	1
372	1
373	1
374	1
375	1
376	0
377	1	hyperlipidemia
378	0
379	1	nausea，hot flashes
380	1
381	1
382	1
383	1
384	1	diarrhea
385	1	endometrial cancer
386	1	joint pain；insomnia
387	1
388	0
389	1
390	0	uterine Leiomyoma；joint pain；
391	1	hyperhidrosis，insomnia，nausea，vomit，hot flashes
392	1
393	0
394	1	nausea, dizziness, joint pain
395	1	hot flashes，hyperhidrosis
396	1
397	1
398	1
399	1
400	1
401	1	headache
402	1
403	1	endometrial thickening
404	1
405	1
406	1
407	0
408	1
409	1
410	1
411	0
412	1
413	1
414	1
415	1
416	0
417	1
418	1
419	1	vomit
420	1
421	1	endometrial thickening
422	1	bone pain、hands and feet numbness、stomachache
423	0
424	0	osteoporosis
425	1
426	1
427	1
428	1
429	1
430	1
431	1
432	1
433	1
434	1	stomachache，eating disorder, depression
435	0
436	0
437	1
438	1	endometrial thickening
439	1	thirst
440	1	joint pain，hyperlipidemia
441	0	joint pain
442	1
443	1
444	1
445	0
446	0
447	1	endometrial thickening
448	0
449	1
450	0
451	1
452	1
453	0
454	1
455	1
456	0
457	1	joint pain，hypocalcemia
458	1	joint pain
459	1
460	1	joint pain，endometrial thickening
461	0
462	1
463	1
464	0
465	1
466	0
467	0	diabetes, joint pain；hot flashes；hyperhidrosis
468	1	nausea, joint pain，hot flashes
469	1
470	0
471	1	endometrial thickening
472	0
473	0
474	1
475	1
476	1
477	1	stomachache
478	1
479	1
480	1
481	1	coronary heart disease
482	1
483	1
484	0
485	1	endometrial thickening，joint pain
486	0
487	1	endometrial thickening
488	1	coronary heart disease
489	0
490	1
491	0
492	1
493	1	abnormal liver function
494	1	endometrial cancer、bone pain
495	1
496	1	endometrial thickening
497	0
498	1	endometrial thickening
499	0
500	1
501	1	irregular menstrual
502	1
503	1
504	0
505	1	weight gain
506	0
507	0
508	0
509	1
510	0	Hyperlipidemia；uterine Leiomyoma
511	1
512	1
513	0	joint pain
514	1
515	1
516	1
517	0
518	1	osteoporosis
519	1
520	0
521	0	osteoporosis, body numbness, hot flashes
522	1
523	1
524	1
525	1
526	0
527	0
528	1
529	1
530	0
531	1
532	0
533	1	stomachache
534	1	joint pain
535	0
536	0
537	0
538	1
539	1
540	1	endometrial thickening
541	1	dyslipidemia；endometrial thickening
542	0
543	0
544	0
545	0
546	1	discomfort of the whole body，hot flashes
547	0
548	0
549	0
550	0
551	1
552	1
553	0
554	1	endometrial cancer
555	0
556	0
557	1	osteoporosis
558	1	oint pain，hot flashes
559	0
560	1
561	1	endometrial cancer
562	0
563	1	osteoporosis
564	0
565	1
566	1
567	1
568	1
569	0
570	0
571	1
572	1	dyslipidemia
573	1
574	0
575	1	hyperhidrosis
576	1
577	1	joint pain，coronary heart disease，dyslipidemia，hot flashes，increased vaginal discharge
578	1	joint pain，dyslipidemia，coronary heart disease，hot flashes，increased vaginal discharge
579	1
580	1
581	1
582	0
583	0
584	0
585	0
586	1	endometrial thickening
587	0
588	1
589	0
590	1	osteoporosis
591	1
592	1
593	1	hysterectomy
594	1	hypocalcemia
595	1	joint pain
596	0
597	1
598	1
599	1	hot flashes、hyperhidrosis
600	0
601	1	endometrial thickening
602	1
603	1
604	1
605	1
606	0
607	0
608	1
609	0	axilla pain and swelling，osteoporosis
610	1
611	0
612	0
613	1	irregular menstrual
614	1	hot flashes
615	0
616	1
617	1
618	1	osteoporosis，dyslipidemia，nausea，vomit
619	1	hypertension，hyperlipidemia, osteoporosis；hot flashes；hyperhidrosis
620	1	endometrial thickening
621	1
622	1	abnormal liver function
623	1	endometrial thickening；endometritis
624	1	osteoporosis，joint pain，heart disease，dyslipidemia，endometrial thickening
625	1	hot flashes, fatigue
626	0
627	0
628	0
629	0
630	1	poor memory，sleepiness
631	1
632	1	osteoporosis
633	0
634	1	varicose veins, vaginal bleeding
635	1	Hyperlipidemia, hyperlipidemia, joint pain
636	1	alopecia
637	1	weight gain, alopecia
638	0	hypocalcemia, hands and feet numbness, fatigue, hot flashes
639	0
640	1
641	1	bladder discomfort，abnormal liver function，endometrial thickening，joint pain，stomachache
642	1
643	1	endometrial thickening
644	1	endometrial thickening
645	0
646	1
647	1	endometrial thickening
648	1	urinary disfunction，increased vaginal discharge
649	1	joint pain，osteoporosis
650	1
651	1	endometrial thickening，ovarian cyst
652	1	hypocalcemia，hot flashes，increased vaginal discharge，anemia
653	1
654	1	blurred vision
655	0
656	1
657	1	endometrial thickening
658	1
659	0
660	1	joint pain；joint pain；dyslipidemia
661	1	alopecia
662	1	diarrhea
663	1
664	0
665	1
666	0
667	1
668	1
669	1	endometrial thickening
670	1	alopecia，hypertension
671	0	ovarian cyst
672	0
673	1
674	1	osteoporosis，joint pain，dyslipidemia，abnormal liver function
675	1
676	1
677	1	endometrial thickening
678	1	endometrial thickening
679	1	endometrial thickening
680	1
681	1	fracture
682	1	endometrial thickening
683	1	endometrial thickening
684	1	endometrial thickening
685	1	endometrial thickening
686	1	endometrial thickening
687	1
688	1	endometrial thickening
689	1	endometrial thickening
690	1	osteoporosis
691	1	abnormal liver function
692	1	endometrial thickening
693	1	osteoporosis
694	1	endometrial thickening
695	1	osteoporosis，hypocalcemia
696	1
697	1	endometrial thickening
698	1	endometrial thickening
699	1
700	1
701	1	endometrial thickening
702	1
703	1
704	1	endometrial thickening
705	1	sactosalpinx
706	1
707	1	endometrial thickening
708	1	endometrial thickening
709	1
710	1	osteoporosis，joint pain
711	1
712	0
713	1	weight gain
714	1	osteoporosis，joint pain，hyperlipidemia
715	1
716	1	abnormal liver function、Hyperlipidemia
717	1	coronary heart disease
718	1
719	1
720	1
721	0
722	0	fatigue；joint pain；hyperhidrosis
723	0
724	1
725	1
726	1
727	1	rash
728	1
729	1	ovarian cyst
730	1	endometrial thickening
731	1
732	1	joint pain，increased vaginal discharge
733	1
734	1	osteoporosis, hair growth
735	0
736	1
737	1
738	1	joint pain，coronary heart disease，dyslipidemia
739	0	endometrial thickening
740	1	hot flashes、endometrial thickening
741	1	joint pain，osteoporosis
742	1
743	0
744	1	endometrial thickening, hot flashes, hyperhidrosis, nausea, vomit
745	1
746	1	endometrial thickening，poor memory
747	0
748	1
749	1
750	0	hypertension；uterine cyst；osteoporosis
751	1
752	1	dysmenorrhea
753	1
754	1
755	1	joint pain
756	1
757	0
758	1	alopecia
759	1	hyperhidrosis, palpitation, insomnia,diabetes
760	1
761	1	abnormal liver function，joint pain
762	1
763	1
764	0	joint pain
765	1	discomfort of the whole body
766	1
767	1
768	1
769	1
770	1
771	1
772	1	hyperlipidemia
773	1
774	1
775	1
776	1	osteoporosis，hot flashes，endometrial thickening，increased vaginal discharge
777	1
778	0
779	1	joint pain
780	1	fatigue；hypertension；Hyperlipidemia；joint pain；hyperhidrosis；hot flashes；hypocalcemia
781	1
782	1
783	1
784	1	increased vaginal discharge
785	1
786	0
787	1	joint pain，dyslipidemia，endometrial thickening，insomnia，discomfort of the whole body，hot flashes
788	1	bone pain、osteoporosis
789	1
790	1	osteoporosis
791	1	back itch
792	1
793	1
794	1
795	1
796	1	weight gain，Hyperlipidemia
797	0
798	1	joint pain
799	1	joint pain
800	1	joint pain
801	1
802	1
803	0	uterine Leiomyoma
804	1
805	0
806	1	osteoporosis，joint pain，endometrial thickening，endometrial polyp
807	1	alopecia
808	0
809	1
810	1	blurred vision
811	1
812	1
813	1
814	1
815	1	joint pain，osteoporosis
816	1
817	1
818	1	hot flashes, osteoporosis
819	1	endometrial thickening
820	1
821	1
822	1	endometrial thickening
823	1	joint pain
824	1
825	1
826	1
827	1
828	1
829	1
830	0	headache, hyperhidrosis
831	1
832	1
833	0	hypocalcemia；joint pain
834	0	endometrial thickening
835	1	osteoporosis，joint pain；endometrial thickening
836	1
837	1	endometrial thickening，hysterectomy
838	1	osteoporosis
839	1	endometrial thickening
840	1
841	1	hot flashes
842	1
843	1	hot flashes；increased vaginal discharge
844	1	hyperhidrosis
845	1
846	1	endometrial thickening
847	1
848	1	osteoporosis
849	0
850	1	insomnia, fatigue, irritability
851	1	uterine Leiomyoma
852	1	hyperhidrosis、insomnia；uterine Leiomyoma
853	1	alopecia
854	1
855	1	osteoporosis
856	1	increased vaginal discharge
857	1
858	1
859	1
860	0
861	1
862	0
863	1	endometrial thickening
864	0
865	1
866	1
867	1
868	0
869	1	osteoporosis
870	1	osteoporosis，joint pain
871	1
872	0
873	1
874	1
875	1
876	0
877	1	osteoporosis,fracture
878	1
879	1	stomachache
880	1
881	1
882	1
883	1
884	1
885	1	endometrial thickening, joint pain, anemia
886	1	osteoporosis, fracture
887	1
888	1
889	0
890	1
891	1
892	1	irregular menstrual
893	1	joint pain；hypocalcemia
894	1
895	1	leg pain
896	0
897	1
898	0	hot flashes；hyperhidrosis；fatigue
899	1
900	1
901	1	cervical polyp
902	1
903	1
904	1
905	0
906	0
907	1
908	1	abnormal liver function
909	1
910	1
911	1	endometrial thickening
912	1
913	1
914	1
915	1
916	1	joint pain；osteoporosis
917	1
918	1	osteoporosis, sleepiness
919	1	osteoporosis
920	1	hot flashes
921	1
922	1
923	1
924	1
925	0	osteoporosis
926	1	endometrial thickening
927	1	bone pain, abnormal liver function, edema, discomfort of the whole body
928	1
929	0
930	0
931	1	nausea；hot flashes
932	0
933	1
934	1
935	1
936	1
937	1
938	1	endometrial thickening
939	1
940	0
941	0
942	1	Hyperlipidemia
943	1
944	1
945	0
946	0
947	1	endometrial thickening
948	1	urinary disfunction, increased vaginal discharge
949	1
950	1
951	1	endometrial thickening
952	1
953	1	endometrial thickening
954	1
955	1
956	0	fatigue；hot flashes
957	1
958	1
959	1	osteoporosis
960	1	bone pain；alopecia
961	1	osteoporosis
962	1	menopause
963	0
964	1	joint pain
965	1	discomfort in the whole body；hot flashes
966	1
967	1	endometrial thickening
968	0
969	1
970	1	osteoporosis
971	1
972	1
973	1
974	1
975	0
976	0
977	0
978	1	bone pain, joint pain, discomfort of the whole body
979	1
980	0	endometrial thickening，osteoporosis，whole body pain
981	1	bone pain
982	1	abnormal liver function；endometrial thickening
983	0	joint pain；hypocalcemia
984	1
985	1	osteoporosis，joint pain；hot flashes；endometrial thickening；increased vaginal discharge
986	1
987	1	insomnia
988	1	rash
989	1
990	1	endometrial thickening，joint pain
991	0	hypertension；joint pain；uterine Leiomyoma；hysterectomy；hyperhidrosis
992	1
993	1
994	1
995	1	fatigue；endometrial thickening
996	0
997	1	endometrial thickening，hysterectomy
998	1
999	1
1000	1
1001	1
1002	1	increased vaginal discharge
1003	1	insomnia
1004	1
1005	1
1006	0
1007	1
