# Supplementary material for: Efficacy and safety of endocrine therapy after mastectomy in patients with hormone receptor positive breast ductal carcinoma in situ: Retrospective cohort study
Source: eLife. 2023 Feb 6;12:e83045. doi: 10.7554/eLife.83045 (PMC9901931; doi:10.7554/eLife.83045)
Supplement: Table 1—source data 1. [file elife-83045-table1-data1.xlsx]

## Sheet: Sheet1
No.	Age	Age（>50）	T stage	Microinvasive	Tumor Grade（level 3）	Ki67 level (<15%)	Multifocal	ET
1	42	0	T1	1	0	1	0	1
2	50	0	T1	0	0	1	0	0
3	65	1	T1	0	0	1	0	0
4	47	0	T1	1	0	1	0	0
5	32	0	T1	0	0	1	0	0
6	42	0	T1	0	0	1	0	1
7	58	1	T1	1	0	0	0	1
8	45	0	T1	1	0	1	0	0
9	71	1	T1	0	0	1	0	1
10	56	1	T2	1	0	1	0	1
11	61	1	T1	0	0	1	0	1
12	47	0	T1	0	0	1	0	0
13	46	0	T1	1	0	1	0	0
14	46	0	T1	1	0	1	0	1
15	72	1	T1	0	0	1	0	0
16	44	0	T1	0	0	1	0	1
17	74	1	T1	0	0	1	0	1
18	72	1	T1	1	0	1	0	0
19	69	1	T2	1	1	1	0	1
20	46	0	T1	0	0	1	0	0
21	61	1	T1	1	0	1	0	0
22	53	1	T1	1	0	1	0	1
23	45	0	T2	1	0	1	1	0
24	49	0	T2	0	0	1	1	1
25	41	0	T1	1	0	1	0	1
26	42	0	T1	0	0	1	0	0
27	47	0	T1	0	0	1	0	0
28	46	0	T1	0	0	1	0	1
29	51	1	T1	0	0	1	0	1
30	75	1	T1	1	0	1	0	1
31	39	0	T2	1	0	1	0	1
32	52	1	T1	1	1	1	0	1
33	55	1	T1	0	0	0	0	0
34	51	1	T1	1	0	1	0	0
35	70	1	T1	0	0	1	0	1
36	53	1	T1	1	0	1	0	0
37	43	0	T2	0	0	1	0	1
38	60	1	T2	1	0	1	0	0
39	38	0	T1	1	1	1	0	1
40	47	0	T1	0	0	1	0	1
41	68	1	T1	0	1	1	0	1
42	46	0	T1	0	0	1	0	1
43	34	0	T2	1	1	1	0	1
44	68	1	T2	0	1	1	1	1
45	53	1	T2	1	1	1	0	1
46	48	0	T2	1	0	1	0	1
47	42	0	T1	1	1	0	0	1
48	75	1	T1	0	0	1	0	1
49	50	0	T1	0	0	1	0	1
50	65	1	T2	0	0	1	1	1
51	58	1	T1	0	0	1	0	1
52	49	0	T1	1	1	1	0	1
53	43	0	T1	0	0	1	0	1
54	58	1	T2	1	1	0	0	1
55	42	0	T1	0	0	1	0	1
56	64	1	T2	0	1	1	0	1
57	44	0	T2	0	0	1	0	1
58	54	1	T2	0	0	1	0	1
59	62	1	T1	0	0	1	0	1
60	37	0	T1	0	0	1	0	0
61	53	1	T1	0	0	1	0	1
62	49	0	T1	1	0	1	0	1
63	48	0	T1	1	0	1	0	0
64	42	0	T1	0	0	1	0	1
65	51	1	T2	0	1	1	0	0
66	55	1	T1	1	1	0	0	1
67	62	1	T2	1	0	0	0	1
68	54	1	T1	0	1	1	0	1
69	46	0	T1	0	0	1	0	1
70	34	0	T1	0	0	1	0	1
71	61	1	T1	0	0	1	0	1
72	43	0	T1	1	0	1	0	1
73	38	0	T1	0	0	1	0	1
74	59	1	T3	0	0	1	0	1
75	45	0	T2	0	0	1	0	0
76	49	0	T1	0	1	1	0	1
77	38	0	T1	0	0	1	0	1
78	61	1	T1	0	0	1	0	1
79	56	1	T2	0	0	1	0	0
80	70	1	T2	0	0	1	0	1
81	53	1	T1	0	0	1	0	1
82	71	1	T1	1	0	1	0	1
83	49	0	T1	1	0	1	0	1
84	50	0	T1	0	0	1	0	1
85	55	1	T1	0	1	1	0	1
86	42	0	T1	1	1	0	0	1
87	56	1	T1	1	1	0	0	1
88	49	0	T1	0	1	1	0	1
89	47	0	T1	0	0	1	0	0
90	72	1	T2	0	0	1	0	1
91	45	0	T1	0	0	1	0	1
92	70	1	T1	0	1	0	0	1
93	48	0	T1	0	0	1	0	1
94	74	1	T1	0	0	1	0	1
95	47	0	T1	0	1	1	0	1
96	72	1	T1	0	0	1	0	1
97	52	1	T1	0	0	1	0	1
98	44	0	T2	1	0	0	0	0
99	78	1	T1	0	0	1	0	0
100	81	1	T1	0	1	0	0	1
101	42	0	T1	1	0	1	0	0
102	44	0	T2	0	0	1	0	0
103	36	0	T2	0	0	1	0	1
104	52	1	T1	0	1	1	0	1
105	45	0	T1	0	0	1	0	1
106	56	1	T1	0	1	1	0	1
107	38	0	T1	0	0	1	0	0
108	48	0	T2	0	1	1	0	1
109	53	1	T1	1	1	0	0	1
110	49	0	T1	1	1	0	0	1
111	68	1	T1	1	0	0	0	1
112	45	0	T1	0	0	1	0	1
113	45	0	T1	0	0	1	0	1
114	47	0	T3	0	0	1	0	1
115	38	0	T2	0	0	1	0	1
116	50	0	T2	0	0	1	0	1
117	62	1	T2	0	1	1	0	0
118	32	0	T2	1	1	1	0	1
119	57	1	T2	0	0	1	0	1
120	38	0	T1	0	0	1	0	1
121	38	0	T2	0	0	1	0	1
122	60	1	T1	0	0	0	0	1
123	41	0	T1	0	0	1	0	1
124	41	0	T1	0	1	0	0	1
125	47	0	T1	0	0	1	0	1
126	48	0	T1	0	0	0	0	0
127	44	0	T1	0	0	1	1	1
128	31	0	T2	0	0	1	0	1
129	63	1	T2	0	0	1	0	1
130	37	0	T2	0	0	1	0	1
131	48	0	T1	0	0	1	0	1
132	37	0	T2	0	1	1	0	1
133	51	1	T2	0	1	1	0	1
134	38	0	T1	0	0	1	0	1
135	64	1	T2	0	0	0	0	1
136	64	1	T2	0	0	0	0	1
137	74	1	T2	0	0	1	0	1
138	42	0	T1	0	0	1	0	1
139	46	0	T1	0	1	1	0	1
140	58	1	T3	0	0	1	0	0
141	48	0	T2	0	1	1	0	1
142	69	1	T2	0	0	1	0	1
143	53	1	T1	0	1	1	0	1
144	32	0	T2	0	0	1	0	1
145	66	1	T2	0	0	1	0	0
146	70	1	T1	0	1	1	0	1
147	70	1	T1	0	0	1	1	1
148	72	1	T1	0	0	1	0	1
149	40	0	T1	0	0	1	0	1
150	40	0	T1	0	0	1	0	1
151	35	0	T2	0	0	1	1	1
152	44	0	T1	0	0	1	0	1
153	71	1	T1	0	0	1	0	1
154	73	1	T1	0	0	1	0	1
155	54	1	T1	1	1	1	0	1
156	40	0	T2	0	0	1	0	1
157	35	0	T1	0	0	1	0	1
158	38	0	T2	1	0	0	0	1
159	57	1	T2	0	0	1	0	1
160	59	1	T1	0	0	1	0	0
161	39	0	T1	0	0	1	0	1
162	41	0	T1	0	0	1	0	1
163	55	1	T1	0	0	1	0	1
164	29	0	T3	0	0	1	0	1
165	49	0	T1	1	1	0	0	1
166	48	0	T2	0	0	1	0	0
167	61	1	T1	0	0	1	0	1
168	49	0	T2	0	0	1	0	1
169	48	0	T1	0	0	0	0	1
170	32	0	T2	1	1	1	0	1
171	47	0	T2	0	0	1	0	1
172	47	0	T1	0	0	1	0	1
173	36	0	T2	0	1	1	0	0
174	60	1	T1	0	0	1	0	0
175	48	0	T2	0	1	1	0	0
176	44	0	T1	0	0	1	0	0
177	40	0	T1	0	1	1	0	1
178	54	1	T1	0	0	1	0	0
179	67	1	T1	0	0	1	0	1
180	42	0	T1	0	0	0	0	1
181	47	0	T2	0	0	1	1	1
182	50	0	T1	0	1	0	0	1
183	72	1	T2	0	1	1	0	1
184	39	0	T1	0	0	1	0	1
185	44	0	T2	0	1	1	0	1
186	45	0	T1	0	1	1	0	0
187	50	0	T2	0	0	1	0	1
188	61	1	T2	0	0	0	0	1
189	73	1	T2	0	0	1	0	1
190	76	1	T1	0	0	1	0	1
191	48	0	T1	0	1	0	0	1
192	44	0	T1	0	0	1	0	0
193	48	0	T2	0	0	1	0	1
194	53	1	T2	0	0	1	0	1
195	53	1	T1	0	1	1	0	1
196	40	0	T1	0	1	1	0	1
197	46	0	T1	1	1	0	0	1
198	41	0	T1	0	1	1	0	1
199	47	0	T1	0	0	1	0	1
200	45	0	T3	0	1	0	0	0
201	76	1	T2	0	0	1	0	1
202	53	1	T3	0	0	0	0	1
203	59	1	T1	0	0	1	0	1
204	46	0	T2	0	0	1	0	1
205	32	0	T2	1	0	1	0	1
206	32	0	T1	0	0	1	0	1
207	71	1	T1	1	0	0	0	1
208	50	0	T1	0	1	1	0	1
209	48	0	T2	0	0	1	0	1
210	73	1	T1	0	0	1	0	1
211	41	0	T2	0	0	1	0	1
212	41	0	T1	0	0	1	0	1
213	43	0	T2	0	0	1	0	1
214	70	1	T1	0	0	1	0	1
215	59	1	T1	0	0	1	0	0
216	75	1	T1	0	0	1	0	1
217	52	1	T1	0	0	1	0	1
218	39	0	T1	0	0	1	0	0
219	75	1	T2	0	0	0	0	1
220	60	1	T1	0	0	1	0	1
221	58	1	T1	0	0	1	0	1
222	37	0	T1	0	0	1	0	1
223	60	1	T2	0	0	0	0	1
224	49	0	T1	0	0	1	0	1
225	48	0	T1	0	0	1	0	1
226	53	1	T1	0	0	1	0	1
227	33	0	T2	0	0	1	0	1
228	45	0	T2	0	1	1	0	1
229	49	0	T2	0	0	1	0	1
230	43	0	T1	0	0	1	1	0
231	50	0	T2	0	0	1	0	1
232	46	0	T1	0	0	1	0	1
233	38	0	T2	0	0	0	0	0
234	86	1	T2	1	0	0	0	1
235	39	0	T1	0	0	1	0	1
236	45	0	T1	0	0	1	0	1
237	80	1	T1	0	0	1	0	1
238	49	0	T1	1	0	1	0	1
239	46	0	T1	1	0	0	0	1
240	61	1	T1	0	0	1	0	0
241	33	0	T2	0	1	1	0	1
242	43	0	T1	0	0	1	0	1
243	33	0	T2	1	1	0	0	1
244	49	0	T1	0	1	1	0	1
245	41	0	T1	0	1	1	0	1
246	43	0	T3	0	0	1	0	0
247	61	1	T1	0	0	1	0	1
248	52	1	T1	1	0	0	0	1
249	53	1	T3	0	0	1	0	1
250	28	0	T2	0	0	0	0	1
251	45	0	T2	0	0	1	0	1
252	51	1	T2	0	1	1	1	0
253	53	1	T1	0	1	1	0	0
254	31	0	T2	1	1	1	0	1
255	60	1	T2	0	0	1	0	1
256	57	1	T1	0	0	0	0	1
257	65	1	T1	1	1	0	0	1
258	75	1	T3	0	1	1	0	1
259	54	1	T2	0	0	1	0	1
260	53	1	T1	1	0	0	0	1
261	48	0	T1	0	0	1	0	1
262	49	0	T1	0	0	1	0	1
263	28	0	T2	0	0	1	0	1
264	76	1	T3	0	0	0	0	1
265	45	0	T2	0	0	1	0	1
266	75	1	T1	0	0	1	0	1
267	45	0	T2	1	0	1	0	1
268	50	0	T1	0	1	1	0	1
269	56	1	T2	0	0	1	0	1
270	54	1	T2	0	0	1	0	1
271	38	0	T1	1	1	0	0	1
272	33	0	T1	0	1	1	0	1
273	63	1	T1	0	1	1	0	1
274	57	1	T1	1	0	1	0	0
275	58	1	T1	1	0	0	0	1
276	48	0	T2	0	1	1	0	1
277	80	1	T1	0	0	1	0	0
278	47	0	T1	0	0	1	1	1
279	73	1	T1	0	0	1	0	1
280	31	0	T1	0	0	1	0	1
281	57	1	T1	0	0	0	0	1
282	50	0	T1	0	0	1	0	1
283	43	0	T1	0	0	1	0	0
284	73	1	T1	0	0	1	0	1
285	49	0	T1	0	1	1	0	0
286	72	1	T1	0	0	1	0	1
287	38	0	T1	0	1	0	0	0
288	44	0	T1	0	1	0	0	1
289	44	0	T2	1	1	0	0	0
290	56	1	T2	1	0	0	0	1
291	53	1	T2	0	0	1	0	0
292	33	0	T1	1	1	1	0	1
293	58	1	T2	1	0	0	0	1
294	58	1	T1	0	0	1	0	1
295	46	0	T2	0	0	1	0	1
296	46	0	T1	0	1	1	0	1
297	40	0	T2	1	1	1	0	1
298	49	0	T1	0	1	1	0	1
299	53	1	T1	1	0	1	1	1
300	63	1	T1	0	0	1	0	1
301	78	1	T1	0	0	1	0	0
302	64	1	T1	0	1	1	1	1
303	39	0	T2	1	0	1	0	0
304	42	0	T1	1	0	0	0	1
305	54	1	T1	0	0	1	0	1
306	50	0	T1	0	0	1	0	1
307	44	0	T2	0	0	1	0	1
308	34	0	T1	0	0	1	0	1
309	48	0	T1	1	1	0	0	1
310	49	0	T2	0	0	0	0	1
311	50	0	T2	0	0	0	0	0
312	47	0	T2	0	0	0	0	1
313	45	0	T2	1	0	0	0	0
314	35	0	T2	1	0	0	0	1
315	54	1	T2	0	0	1	0	1
316	43	0	T1	0	0	0	0	1
317	45	0	T2	0	0	1	0	1
318	39	0	T1	1	0	0	0	1
319	49	0	T2	0	1	1	0	1
320	52	1	T2	1	0	0	0	1
321	49	0	T1	0	1	1	0	1
322	46	0	T2	1	0	0	0	1
323	64	1	T1	0	0	1	0	1
324	60	1	T2	1	0	0	0	0
325	51	1	T2	0	0	1	0	1
326	37	0	T1	0	0	1	0	1
327	40	0	T2	0	0	0	0	1
328	49	0	T1	0	0	1	0	1
329	56	1	T1	0	0	1	0	0
330	48	0	T1	0	1	0	0	0
331	41	0	T2	0	1	0	0	1
332	62	1	T1	0	0	1	0	1
333	43	0	T1	0	1	1	0	0
334	63	1	T1	1	0	1	0	1
335	47	0	T2	0	0	1	0	1
336	37	0	T2	1	1	1	1	1
337	51	1	T1	0	0	1	0	1
338	44	0	T1	1	0	0	0	1
339	48	0	T1	0	1	1	0	1
340	57	1	T3	0	0	1	0	1
341	46	0	T1	0	0	1	0	1
342	60	1	T2	1	1	0	0	1
343	39	0	T1	1	1	1	0	1
344	70	1	T1	1	0	1	0	0
345	59	1	T1	0	0	0	0	1
346	58	1	T2	0	1	0	0	1
347	75	1	T3	0	0	1	0	1
348	46	0	T3	0	0	1	0	1
349	52	1	T2	0	1	1	0	0
350	62	1	T2	0	1	1	0	0
351	58	1	T2	0	0	0	0	0
352	41	0	T2	0	1	1	0	1
353	46	0	T1	0	0	1	0	1
354	48	0	T1	0	0	1	0	1
355	53	1	T1	0	0	1	1	1
356	61	1	T1	0	0	1	0	0
357	68	1	T2	0	0	1	0	1
358	51	1	T1	0	1	1	0	1
359	56	1	T1	1	1	1	0	1
360	40	0	T2	0	0	1	0	1
361	53	1	T2	1	0	1	1	1
362	53	1	T2	0	0	0	1	1
363	51	1	T1	1	0	1	0	0
364	42	0	T1	0	0	1	0	1
365	51	1	T2	0	0	1	0	1
366	38	0	T1	0	1	1	0	1
367	76	1	T1	1	0	1	0	1
368	60	1	T1	0	0	1	0	1
369	44	0	T1	0	0	1	0	1
370	43	0	T2	0	0	1	0	1
371	56	1	T1	1	0	0	0	1
372	57	1	T2	1	0	1	0	1
373	47	0	T1	0	0	1	0	1
374	57	1	T1	0	0	0	0	1
375	65	1	T2	1	0	1	0	1
376	51	1	T2	0	0	1	1	0
377	56	1	T1	1	1	0	0	1
378	53	1	T2	0	1	1	0	0
379	44	0	T2	0	0	1	0	1
380	48	0	T1	0	0	1	0	1
381	55	1	T2	0	0	1	0	1
382	43	0	T2	1	1	0	0	1
383	28	0	T3	0	0	1	0	1
384	75	1	T2	0	0	1	0	1
385	73	1	T1	0	0	1	0	1
386	64	1	T1	0	0	1	0	1
387	63	1	T2	0	0	0	0	1
388	61	1	T2	1	0	1	0	0
389	44	0	T1	0	0	0	0	1
390	61	1	T1	0	0	1	0	0
391	61	1	T2	0	1	1	0	1
392	42	0	T1	0	0	1	0	1
393	53	1	T2	0	0	1	0	0
394	66	1	T1	0	0	1	1	1
395	44	0	T1	0	0	0	1	1
396	40	0	T3	0	0	0	0	1
397	72	1	T2	0	0	0	0	1
398	60	1	T2	0	0	0	0	1
399	66	1	T2	0	0	1	1	1
400	61	1	T1	0	0	0	0	1
401	50	0	T1	0	0	0	1	1
402	56	1	T1	1	0	1	0	1
403	73	1	T2	1	0	1	1	1
404	47	0	T1	0	0	1	0	1
405	56	1	T2	0	0	0	0	1
406	49	0	T2	0	1	0	0	1
407	59	1	T1	0	1	1	1	0
408	53	1	T1	0	0	0	0	1
409	48	0	T1	0	0	1	0	1
410	47	0	T2	0	0	1	0	1
411	51	1	T1	0	0	0	0	0
412	76	1	T1	0	0	1	0	1
413	57	1	T2	0	0	1	0	1
414	67	1	T1	1	0	0	0	1
415	48	0	T2	0	0	0	0	1
416	42	0	T2	0	0	1	0	0
417	44	0	T1	0	0	1	0	1
418	50	0	T1	0	0	1	0	1
419	38	0	T1	0	0	1	0	1
420	65	1	T1	1	0	1	0	1
421	51	1	T2	0	1	0	0	1
422	70	1	T1	0	0	0	0	1
423	41	0	T1	0	0	0	0	0
424	66	1	T1	0	0	1	0	0
425	38	0	T1	1	0	1	1	1
426	46	0	T1	0	0	0	0	1
427	44	0	T2	0	1	1	0	1
428	51	1	T1	0	0	1	0	1
429	50	0	T2	1	0	1	1	1
430	48	0	T1	0	1	1	0	1
431	50	0	T2	0	1	1	1	1
432	43	0	T2	0	1	1	0	1
433	46	0	T2	1	0	0	0	1
434	50	0	T1	0	1	1	0	1
435	37	0	T1	0	0	1	0	0
436	50	0	T2	0	0	1	0	0
437	53	1	T3	0	0	0	1	1
438	46	0	T2	0	0	1	0	1
439	56	1	T2	1	0	1	0	1
440	63	1	T1	0	0	1	0	1
441	53	1	T1	0	0	1	0	0
442	51	1	T1	1	1	0	0	1
443	33	0	T1	0	0	1	0	1
444	79	1	T1	0	0	1	0	1
445	55	1	T1	1	0	0	0	0
446	35	0	T1	0	0	1	0	0
447	37	0	T1	0	0	1	0	1
448	62	1	T1	0	0	1	1	0
449	51	1	T1	0	0	1	0	1
450	41	0	T1	0	0	1	0	0
451	42	0	T2	0	1	1	0	1
452	72	1	T1	0	0	1	0	1
453	50	0	T1	0	1	1	0	0
454	42	0	T3	1	1	1	0	1
455	53	1	T2	0	1	0	0	1
456	38	0	T1	0	1	1	0	0
457	46	0	T2	1	1	0	0	1
458	72	1	T2	0	0	1	0	1
459	72	1	T1	0	1	1	0	1
460	54	1	T2	0	1	1	0	1
461	44	0	T2	0	1	1	0	0
462	73	1	T2	0	0	1	0	1
463	41	0	T1	0	0	1	0	1
464	48	0	T2	0	0	0	0	0
465	50	0	T1	0	0	1	0	1
466	33	0	T1	0	0	1	0	0
467	47	0	T1	0	1	1	0	0
468	43	0	T2	0	0	1	0	1
469	80	1	T1	0	0	0	0	1
470	51	1	T2	1	0	0	0	0
471	44	0	T1	0	0	1	0	1
472	26	0	T2	0	0	1	0	0
473	44	0	T2	0	1	0	0	0
474	34	0	T2	0	0	0	0	1
475	50	0	T2	0	1	0	0	1
476	37	0	T2	0	0	1	0	1
477	42	0	T2	0	1	1	0	1
478	46	0	T2	1	1	1	0	1
479	44	0	T1	0	0	1	0	1
480	50	0	T1	0	0	0	0	1
481	65	1	T1	0	0	1	0	1
482	53	1	T1	0	1	1	0	1
483	62	1	T1	0	1	0	0	1
484	58	1	T2	0	0	0	0	0
485	45	0	T2	0	1	1	0	1
486	66	1	T1	0	0	1	0	0
487	45	0	T2	0	0	1	0	1
488	78	1	T1	0	0	1	0	1
489	43	0	T2	1	1	0	0	0
490	60	1	T2	0	1	0	0	1
491	53	1	T2	0	0	0	0	0
492	40	0	T1	0	0	0	0	1
493	35	0	T1	0	1	1	0	1
494	50	0	T2	0	0	1	0	1
495	71	1	T1	0	0	1	0	1
496	30	0	T1	0	1	0	0	1
497	56	1	T2	0	0	1	0	0
498	49	0	T2	0	1	1	0	1
499	43	0	T1	0	0	1	0	0
500	48	0	T2	1	1	1	0	1
501	46	0	T2	0	0	1	1	1
502	74	1	T2	0	0	0	0	1
503	43	0	T2	0	1	1	0	1
504	46	0	T2	1	0	0	0	0
505	45	0	T1	0	0	1	0	1
506	63	1	T2	0	0	0	0	0
507	43	0	T2	0	0	0	0	0
508	47	0	T1	0	0	1	0	0
509	43	0	T2	0	1	0	0	1
510	49	0	T1	0	0	1	0	0
511	49	0	T2	0	0	1	0	1
512	49	0	T1	0	1	1	0	1
513	49	0	T1	0	0	1	0	0
514	38	0	T2	0	1	0	0	1
515	58	1	T1	0	0	1	0	1
516	67	1	T1	0	0	1	0	1
517	34	0	T1	0	0	1	0	0
518	62	1	T1	0	0	1	0	1
519	58	1	T1	1	0	1	1	1
520	47	0	T1	1	0	1	1	0
521	71	1	T1	0	0	1	0	0
522	79	1	T1	1	0	1	0	1
523	41	0	T1	1	0	1	0	1
524	55	1	T2	0	0	1	0	1
525	51	1	T1	0	0	1	0	1
526	46	0	T2	0	0	1	0	0
527	51	1	T2	0	0	1	0	0
528	47	0	T2	1	0	0	0	1
529	52	1	T1	0	0	0	0	1
530	71	1	T2	0	0	1	0	0
531	40	0	T2	1	1	0	0	1
532	56	1	T1	0	0	1	0	0
533	47	0	T1	0	1	1	0	1
534	48	0	T2	0	0	1	1	1
535	59	1	T2	0	0	1	0	0
536	52	1	T1	0	0	1	0	0
537	45	0	T1	0	0	0	0	0
538	77	1	T1	0	1	0	0	1
539	65	1	T2	1	0	1	0	1
540	65	1	T1	0	1	1	0	1
541	62	1	T1	0	0	1	0	1
542	67	1	T1	0	0	0	0	0
543	41	0	T1	0	0	1	0	0
544	40	0	T2	0	0	1	0	0
545	62	1	T2	0	0	1	0	0
546	58	1	T2	0	1	1	0	1
547	37	0	T1	0	0	1	0	0
548	59	1	T1	0	1	1	0	0
549	68	1	T2	0	0	1	0	0
550	72	1	T2	0	0	1	0	0
551	62	1	T2	0	0	1	0	1
552	51	1	T1	0	0	0	0	1
553	61	1	T2	0	0	1	0	0
554	38	0	T2	0	0	1	0	1
555	60	1	T1	0	0	0	0	0
556	27	0	T3	0	1	0	1	0
557	62	1	T2	0	0	0	0	1
558	47	0	T1	0	0	1	1	1
559	55	1	T2	0	0	1	0	0
560	49	0	T1	0	0	1	0	1
561	45	0	T1	0	0	0	0	1
562	43	0	T1	0	1	1	0	0
563	37	0	T1	0	1	1	0	1
564	64	1	T2	0	0	0	0	0
565	57	1	T2	0	1	0	0	1
566	34	0	T2	0	1	1	0	1
567	44	0	T2	0	0	1	0	1
568	37	0	T2	0	1	0	0	1
569	56	1	T2	0	1	0	0	0
570	56	1	T1	0	0	0	1	0
571	67	1	T1	0	1	1	1	1
572	46	0	T1	0	1	1	0	1
573	45	0	T1	1	0	1	0	1
574	51	1	T1	0	0	1	0	0
575	43	0	T1	0	1	0	0	1
576	31	0	T2	0	1	1	1	1
577	42	0	T2	0	0	1	0	1
578	50	0	T2	0	1	1	0	1
579	59	1	T1	0	0	0	0	1
580	41	0	T3	0	0	0	0	1
581	48	0	T2	1	1	1	0	1
582	44	0	T2	0	0	1	0	0
583	49	0	T1	0	0	1	0	0
584	41	0	T2	0	1	0	0	0
585	52	1	T1	0	1	0	0	0
586	60	1	T1	0	1	0	0	1
587	60	1	T1	0	0	0	0	0
588	54	1	T1	1	0	0	0	1
589	66	1	T2	1	0	0	0	0
590	54	1	T1	0	1	1	0	1
591	47	0	T2	1	0	1	0	1
592	46	0	T2	0	0	0	0	1
593	46	0	T2	1	1	1	0	1
594	59	1	T1	0	0	1	0	1
595	46	0	T2	0	0	1	0	1
596	68	1	T1	0	0	1	0	0
597	59	1	T3	0	0	0	0	1
598	44	0	T1	0	0	0	0	1
599	43	0	T1	0	0	1	0	1
600	43	0	T1	0	0	1	0	0
601	49	0	T1	0	0	1	0	1
602	44	0	T1	0	0	1	1	1
603	51	1	T1	0	0	0	0	1
604	63	1	T2	0	1	0	0	1
605	46	0	T2	0	0	1	1	1
606	55	1	T1	0	1	1	0	0
607	42	0	T1	0	0	1	0	0
608	80	1	T2	1	1	1	0	1
609	45	0	T2	0	0	1	0	0
610	60	1	T2	0	0	0	0	1
611	51	1	T1	0	0	1	0	0
612	48	0	T1	0	0	0	0	0
613	36	0	T1	0	0	0	0	1
614	54	1	T1	0	0	1	0	1
615	66	1	T2	0	0	1	0	0
616	61	1	T1	0	0	0	0	1
617	74	1	T1	0	0	1	0	1
618	61	1	T1	0	1	0	0	1
619	68	1	T2	1	1	1	1	1
620	49	0	T1	0	0	1	0	1
621	51	1	T1	0	0	1	0	1
622	48	0	T2	0	0	0	0	1
623	68	1	T1	0	0	1	0	1
624	49	0	T1	0	0	1	0	1
625	44	0	T1	0	0	1	0	1
626	52	1	T1	0	1	1	0	0
627	52	1	T1	0	1	0	0	0
628	51	1	T1	0	0	1	0	0
629	61	1	T1	0	0	1	0	0
630	45	0	T1	0	0	1	0	1
631	49	0	T2	0	0	0	0	1
632	48	0	T2	0	1	0	0	1
633	42	0	T1	0	1	0	0	0
634	45	0	T1	0	0	1	0	1
635	49	0	T1	0	1	0	0	1
636	64	1	T1	0	0	0	0	1
637	45	0	T1	0	0	0	0	1
638	46	0	T1	1	1	0	0	0
639	57	1	T2	0	0	0	0	0
640	54	1	T1	0	0	1	0	1
641	45	0	T3	0	0	0	0	1
642	34	0	T2	0	1	1	0	1
643	41	0	T1	0	0	1	1	1
644	43	0	T1	0	0	1	0	1
645	43	0	T1	0	0	1	0	0
646	44	0	T1	0	0	1	0	1
647	43	0	T1	0	0	0	0	1
648	58	1	T3	0	0	0	0	1
649	56	1	T2	1	1	1	0	1
650	50	0	T1	1	0	0	0	1
651	45	0	T1	0	1	1	0	1
652	38	0	T2	0	1	0	0	1
653	52	1	T1	0	0	0	0	1
654	46	0	T1	1	0	1	1	1
655	39	0	T3	0	1	0	0	0
656	43	0	T1	0	0	1	1	1
657	50	0	T2	0	1	0	0	1
658	48	0	T2	0	0	1	0	1
659	50	0	T2	0	0	1	0	0
660	64	1	T3	0	0	1	0	1
661	57	1	T1	0	0	1	0	1
662	51	1	T2	1	1	0	0	1
663	61	1	T1	0	0	1	0	1
664	31	0	T1	0	0	1	0	0
665	64	1	T2	0	0	1	1	1
666	56	1	T1	0	1	0	0	0
667	43	0	T2	0	0	0	1	1
668	39	0	T2	0	0	0	0	1
669	48	0	T2	0	1	0	0	1
670	73	1	T1	0	1	0	0	1
671	41	0	T3	1	0	1	0	0
672	55	1	T2	0	0	1	0	0
673	47	0	T1	1	0	0	0	1
674	59	1	T1	0	1	0	0	1
675	49	0	T2	0	0	1	0	1
676	58	1	T1	0	0	0	1	1
677	45	0	T2	0	0	1	0	1
678	43	0	T2	0	0	1	1	1
679	45	0	T2	0	1	1	0	1
680	39	0	T1	0	0	0	1	1
681	77	1	T1	0	0	0	1	1
682	39	0	T1	0	0	0	0	1
683	47	0	T2	0	0	0	0	1
684	35	0	T1	0	1	0	0	1
685	42	0	T2	0	0	1	0	1
686	43	0	T1	0	0	1	0	1
687	70	1	T1	0	0	0	0	1
688	38	0	T2	0	0	1	0	1
689	45	0	T1	0	1	0	0	1
690	61	1	T1	0	0	1	0	1
691	36	0	T1	0	0	1	0	1
692	44	0	T1	0	0	1	0	1
693	73	1	T2	0	0	1	0	1
694	42	0	T1	0	0	0	0	1
695	55	1	T1	0	0	0	0	1
696	46	0	T2	0	1	0	1	1
697	41	0	T2	0	0	0	0	1
698	43	0	T1	0	0	1	0	1
699	52	1	T2	0	0	1	0	1
700	59	1	T1	0	0	0	0	1
701	44	0	T1	0	1	0	0	1
702	50	0	T2	0	1	0	0	1
703	47	0	T1	0	0	1	1	1
704	49	0	T1	0	0	0	0	1
705	39	0	T1	0	0	0	0	1
706	65	1	T2	0	1	0	0	1
707	29	0	T1	0	0	0	0	1
708	48	0	T1	0	0	0	0	1
709	50	0	T1	1	1	1	0	1
710	61	1	T2	1	0	1	0	1
711	51	1	T2	0	0	0	0	1
712	75	1	T1	0	0	1	0	0
713	36	0	T1	0	0	1	0	1
714	56	1	T2	0	0	1	0	1
715	57	1	T1	0	0	1	0	1
716	27	0	T1	0	0	1	0	1
717	66	1	T1	0	0	1	0	1
718	61	1	T1	1	0	0	0	1
719	49	0	T3	1	1	0	1	1
720	43	0	T1	0	1	1	0	1
721	62	1	T1	0	1	1	0	0
722	60	1	T2	0	0	1	0	0
723	49	0	T1	0	0	0	0	0
724	43	0	T2	1	1	1	0	1
725	47	0	T1	1	1	1	0	1
726	60	1	T1	0	1	1	0	1
727	39	0	T1	0	1	1	0	1
728	49	0	T1	0	0	1	0	1
729	46	0	T1	0	1	0	0	1
730	34	0	T2	0	1	0	0	1
731	51	1	T2	0	1	0	1	1
732	60	1	T1	0	1	1	0	1
733	48	0	T2	0	1	0	0	1
734	73	1	T2	0	0	0	1	1
735	40	0	T1	0	0	1	0	0
736	50	0	T1	0	0	1	0	1
737	37	0	T1	0	0	1	0	1
738	64	1	T1	0	1	0	0	1
739	59	1	T2	0	1	1	0	0
740	59	1	T1	0	1	1	0	1
741	52	1	T1	0	1	0	0	1
742	50	0	T1	0	0	0	0	1
743	46	0	T2	0	0	1	1	0
744	39	0	T2	0	0	1	0	1
745	45	0	T1	0	0	1	0	1
746	49	0	T1	0	0	1	1	1
747	50	0	T2	0	0	1	1	0
748	33	0	T1	0	0	1	0	1
749	55	1	T2	0	0	1	1	1
750	61	1	T1	0	0	1	0	0
751	42	0	T2	0	1	1	0	1
752	41	0	T1	0	0	1	1	1
753	49	0	T1	0	0	1	1	1
754	44	0	T2	0	1	0	0	1
755	49	0	T1	0	1	0	1	1
756	33	0	T2	0	1	0	0	1
757	41	0	T1	0	0	1	0	0
758	51	1	T1	0	0	1	0	1
759	32	0	T1	1	0	1	0	1
760	41	0	T1	0	0	1	0	1
761	58	1	T1	0	0	1	0	1
762	52	1	T1	0	0	1	0	1
763	57	1	T2	0	1	0	0	1
764	46	0	T3	0	1	0	0	0
765	52	1	T1	0	0	0	0	1
766	37	0	T1	0	0	0	0	1
767	50	0	T2	0	0	1	0	1
768	42	0	T2	0	1	1	0	1
769	50	0	T1	0	0	1	0	1
770	44	0	T2	0	1	1	0	1
771	56	1	T2	1	1	0	0	1
772	50	0	T1	1	0	0	0	1
773	52	1	T3	0	0	1	0	1
774	40	0	T2	0	1	1	0	1
775	51	1	T1	0	1	0	0	1
776	42	0	T2	0	0	1	1	1
777	69	1	T1	0	0	1	0	1
778	50	0	T1	0	0	1	0	0
779	49	0	T1	0	0	1	0	1
780	35	0	T1	0	1	0	0	1
781	54	1	T1	0	0	0	0	1
782	49	0	T1	0	0	0	0	1
783	47	0	T1	0	0	0	0	1
784	46	0	T1	0	1	1	0	1
785	50	0	T1	1	0	0	1	1
786	54	1	T3	0	1	0	0	0
787	50	0	T2	0	1	1	0	1
788	71	1	T1	1	0	1	0	1
789	61	1	T1	0	1	0	0	1
790	64	1	T1	0	1	0	0	1
791	50	0	T1	0	0	0	0	1
792	58	1	T1	0	0	1	0	1
793	40	0	T1	0	0	1	0	1
794	52	1	T1	0	0	0	0	1
795	56	1	T2	0	0	1	0	1
796	47	0	T2	0	1	0	0	1
797	62	1	T1	0	0	1	0	0
798	44	0	T2	0	0	1	0	1
799	52	1	T1	0	0	0	0	1
800	52	1	T2	0	1	0	0	1
801	60	1	T1	0	0	0	0	1
802	41	0	T2	0	0	1	0	1
803	45	0	T2	0	0	1	0	0
804	55	1	T1	1	1	0	0	1
805	53	1	T1	0	0	1	1	0
806	47	0	T1	0	0	0	0	1
807	38	0	T2	0	0	0	0	1
808	35	0	T1	0	0	0	0	0
809	51	1	T2	0	1	1	0	1
810	41	0	T1	0	1	0	0	1
811	63	1	T1	0	0	1	1	1
812	51	1	T2	0	0	0	0	1
813	51	1	T1	0	0	0	0	1
814	46	0	T2	0	0	0	0	1
815	73	1	T2	0	0	1	0	1
816	57	1	T1	0	0	1	0	1
817	45	0	T1	0	0	0	0	1
818	53	1	T2	0	0	0	1	1
819	69	1	T1	0	0	1	0	1
820	77	1	T1	0	0	0	0	1
821	39	0	T1	0	0	0	0	1
822	41	0	T2	0	0	1	0	1
823	48	0	T1	0	0	1	0	1
824	47	0	T1	0	0	1	0	1
825	49	0	T2	0	0	1	0	1
826	81	1	T2	0	0	1	0	1
827	60	1	T2	0	0	0	0	1
828	72	1	T2	0	1	0	0	1
829	59	1	T1	0	0	0	0	1
830	51	1	T1	0	1	1	0	0
831	37	0	T3	0	0	0	0	1
832	55	1	T2	0	1	0	0	1
833	56	1	T2	0	1	0	0	0
834	47	0	T1	0	0	1	0	0
835	58	1	T2	0	1	0	0	1
836	36	0	T2	0	0	0	0	1
837	47	0	T2	0	0	1	0	1
838	60	1	T1	0	0	0	0	1
839	46	0	T1	0	0	1	0	1
840	64	1	T1	0	1	1	0	1
841	51	1	T2	0	0	1	0	1
842	45	0	T2	0	0	1	0	1
843	46	0	T2	0	0	0	1	1
844	59	1	T2	0	1	0	0	1
845	58	1	T2	0	0	1	0	1
846	34	0	T2	0	0	1	0	1
847	45	0	T2	0	0	1	0	1
848	45	0	T2	0	0	0	0	1
849	60	1	T1	0	0	1	0	0
850	45	0	T1	0	0	0	1	1
851	50	0	T1	0	0	1	0	1
852	42	0	T2	0	0	1	0	1
853	50	0	T1	0	0	0	0	1
854	44	0	T2	0	0	1	0	1
855	53	1	T2	0	0	0	0	1
856	64	1	T1	0	0	1	0	1
857	66	1	T2	0	0	0	0	1
858	50	0	T1	1	0	1	0	1
859	52	1	T2	1	1	0	0	1
860	50	0	T1	0	0	1	0	0
861	49	0	T3	1	0	0	1	1
862	48	0	T2	0	0	1	1	0
863	52	1	T2	0	1	0	0	1
864	45	0	T2	0	0	0	0	0
865	39	0	T1	0	0	0	0	1
866	61	1	T1	0	0	0	0	1
867	43	0	T1	0	0	0	0	1
868	43	0	T1	0	1	0	0	0
869	59	1	T1	0	0	1	0	1
870	53	1	T2	0	0	0	0	1
871	46	0	T1	0	0	0	0	1
872	48	0	T2	0	1	0	0	0
873	49	0	T1	0	0	1	0	1
874	44	0	T1	0	1	0	0	1
875	41	0	T1	0	0	0	0	1
876	60	1	T2	0	1	1	0	0
877	55	1	T1	0	0	1	0	1
878	46	0	T1	0	0	1	1	1
879	43	0	T2	0	0	1	0	1
880	57	1	T3	0	1	0	0	1
881	39	0	T2	0	0	0	0	1
882	59	1	T2	0	0	1	0	1
883	55	1	T2	0	0	1	0	1
884	42	0	T2	0	1	1	0	1
885	43	0	T1	0	0	1	0	1
886	56	1	T1	0	0	0	0	1
887	54	1	T1	0	0	0	0	1
888	43	0	T1	0	0	1	0	1
889	61	1	T1	0	0	0	0	0
890	69	1	T1	0	0	1	0	1
891	61	1	T2	0	0	0	0	1
892	37	0	T1	1	1	0	0	1
893	50	0	T1	0	0	1	0	1
894	46	0	T1	0	0	1	0	1
895	43	0	T3	0	0	0	0	1
896	64	1	T1	0	0	0	0	0
897	59	1	T2	0	0	0	0	1
898	56	1	T2	0	0	0	0	0
899	64	1	T2	0	1	0	0	1
900	36	0	T1	1	1	0	0	1
901	46	0	T2	0	1	0	0	1
902	43	0	T1	0	0	0	0	1
903	58	1	T2	0	0	1	0	1
904	37	0	T2	0	0	0	0	1
905	59	1	T2	0	1	1	0	0
906	46	0	T1	0	0	1	0	0
907	61	1	T1	0	0	1	0	1
908	39	0	T2	0	0	0	0	1
909	58	1	T2	0	0	1	0	1
910	31	0	T2	0	0	1	1	1
911	40	0	T2	0	0	0	0	1
912	66	1	T1	0	0	1	0	1
913	43	0	T1	0	1	0	0	1
914	28	0	T3	0	0	1	0	1
915	46	0	T1	0	0	1	0	1
916	52	1	T1	0	1	1	0	1
917	62	1	T1	0	0	0	0	1
918	61	1	T1	0	1	1	0	1
919	55	1	T1	1	0	0	0	1
920	55	1	T2	0	1	0	0	1
921	51	1	T1	0	0	1	0	1
922	47	0	T1	0	0	1	0	1
923	69	1	T1	0	0	1	0	1
924	44	0	T1	0	0	0	0	1
925	62	1	T1	0	0	1	0	0
926	38	0	T1	0	1	1	0	1
927	61	1	T1	0	0	1	0	1
928	40	0	T1	0	0	0	0	1
929	77	1	T2	0	0	1	0	0
930	51	1	T2	1	0	0	0	0
931	67	1	T2	1	1	1	0	1
932	52	1	T1	0	1	1	0	0
933	53	1	T1	0	1	0	1	1
934	46	0	T1	0	0	0	0	1
935	58	1	T1	0	1	0	0	1
936	55	1	T2	0	1	1	0	1
937	48	0	T1	0	1	0	0	1
938	31	0	T1	0	0	1	0	1
939	55	1	T2	0	1	0	0	1
940	44	0	T1	0	1	0	0	0
941	47	0	T1	0	1	0	0	0
942	80	1	T2	0	1	1	0	1
943	53	1	T2	0	0	1	0	1
944	47	0	T2	0	0	1	1	1
945	41	0	T1	0	0	1	0	0
946	36	0	T1	0	0	1	0	0
947	48	0	T2	0	1	0	0	1
948	44	0	T2	0	0	0	0	1
949	71	1	T2	0	0	0	1	1
950	69	1	T2	1	0	0	0	1
951	49	0	T1	0	0	1	0	1
952	50	0	T1	0	0	1	0	1
953	55	1	T1	0	0	1	0	1
954	68	1	T3	0	0	0	0	1
955	57	1	T2	1	0	0	0	1
956	55	1	T1	0	1	0	0	0
957	44	0	T1	0	1	0	0	1
958	45	0	T1	0	1	0	0	1
959	65	1	T1	0	0	1	0	1
960	57	1	T1	0	0	1	0	1
961	48	0	T1	0	0	1	0	1
962	40	0	T1	0	0	1	0	1
963	40	0	T1	0	0	1	0	0
964	52	1	T1	0	0	0	0	1
965	44	0	T3	0	1	0	0	1
966	38	0	T1	0	0	0	0	1
967	43	0	T2	0	0	1	0	1
968	49	0	T2	0	0	0	0	0
969	46	0	T3	0	0	0	0	1
970	64	1	T1	0	0	1	0	1
971	44	0	T1	0	0	1	0	1
972	46	0	T2	0	0	1	0	1
973	45	0	T2	0	1	1	0	1
974	54	1	T2	1	1	0	0	1
975	43	0	T2	0	0	1	0	0
976	47	0	T1	0	0	0	0	0
977	43	0	T2	0	0	0	0	0
978	55	1	T1	1	0	1	0	1
979	49	0	T1	1	0	0	0	1
980	64	1	T1	0	0	1	0	0
981	54	1	T1	0	0	1	0	1
982	44	0	T1	0	0	0	0	1
983	53	1	T3	0	0	1	0	0
984	40	0	T2	0	0	1	0	1
985	46	0	T2	0	1	0	0	1
986	48	0	T1	0	0	0	0	1
987	43	0	T1	0	0	1	0	1
988	47	0	T1	0	0	0	0	1
989	57	1	T1	1	0	0	0	1
990	48	0	T3	0	0	1	0	1
991	52	1	T2	0	1	0	0	0
992	36	0	T2	0	1	0	0	1
993	40	0	T2	0	1	1	0	1
994	52	1	T1	0	0	1	0	1
995	56	1	T1	0	0	0	0	1
996	45	0	T2	0	0	1	0	0
997	42	0	T2	0	1	0	0	1
998	48	0	T2	0	0	0	0	1
999	69	1	T1	0	0	1	0	1
1000	48	0	T1	1	0	1	0	1
1001	42	0	T2	0	0	0	0	1
1002	47	0	T2	0	1	1	1	1
1003	53	1	T3	0	1	0	0	1
1004	52	1	T2	0	1	1	0	1
1005	41	0	T2	0	0	0	0	1
1006	41	0	T1	0	1	0	0	0
1007	66	1	T1	0	1	1	0	1
