# Supplementary material for: Efficacy and safety of endocrine therapy after mastectomy in patients with hormone receptor positive breast ductal carcinoma in situ: Retrospective cohort study
Source: eLife. 2023 Feb 6;12:e83045. doi: 10.7554/eLife.83045 (PMC9901931; doi:10.7554/eLife.83045)
Supplement: Table 2—source data 1. [file elife-83045-table2-data1.xlsx]

## Sheet: Sheet1
No.	ET	Drug type	Adverse events	Recurrence/metastasis	Recurrence/metastasis	Time and site
1	1	TAM	endometrial thickening	0	0	0
2	0	0		0	0	0
3	0	0		0	0	0
4	0	0		0	0	0
5	0	0		0	0	0
6	1	TAM	joint pain；increased vaginal discharge	0	0	0
7	1	TAM		0	0	0
8	0	0		0	0	0
9	1	AI	osteoporosis,ulna fracture in 2018	0	0	0
10	1	AI	elevated hepatic transaminases	0	0	0
11	1	AI	osteoporosis	0	0	0
12	0	0		0	0	0
13	0	0		0	0	0
14	1	TAM	endometrial thickening	0	0	0
15	0	0		0	0	0
16	1	AI		0	0	0
17	1	TAM	joint pain	0	0	0
18	0	0		0	0	0
19	1	AI		0	0	0
20	0	0		0	0	0
21	0	0		0	0	0
22	1	TAM	joint pain	0	0	0
23	0	0		0	0	0
24	1	TAM		0	0	0
25	1	TAM		0	0	0
26	0	0		0	0	0
27	0	0		0	0	0
28	1	AI	joint pain；osteoporosis；hypertension；Hyperlipidemia	0	0	0
29	1	TAM		0	0	0
30	1	AI	coronary heart disease	0	0	0
31	1	TAM		0	0	0
32	1	AI		0	0	0
33	0	0		0	0	0
34	0	0		0	0	0
35	1	TAM	joint pain	0	0	0
36	0	0		0	0	0
37	1	TAM		0	0	0
38	0	0		0	0	0
39	1	TAM		0	0	0
40	1	TAM	joint pain；endometrial thickening	0	0	0
41	1	转换		0	0	0
42	1	TAM		0	0	0
43	1	AI		0	0	0
44	1	AI	hypertension	0	0	0
45	1	AI	osteoporosis	1	1	bone metastasis in May,2016
46	1	TAM		0	0	0
47	1	TAM		0	0	0
48	1	AI	stomachache	0	0	0
49	1	TAM		0	0	0
50	1	AI		1	1	lung metastasis in September,2011
51	1	AI	acid reflux	0	0	0
52	1	AI		0	0	0
53	1	TAM		0	0	0
54	1	AI		0	0	0
55	1	AI	joint pain	0	0	0
56	1	AI		0	0	0
57	1	AI	abnormal liver function	0	0	0
58	1	AI	hot flashes，endometrial thickening	0	0	0
59	1	AI		0	0	0
60	0	0		0	0	0
61	1	转换	endometrial thickening	0	0	0
62	1	TAM		0	0	0
63	0	0		0	0	0
64	1	TAM	joint pain	0	0	0
65	0	0		0	0	0
66	1	AI		0	0	0
67	1	AI		0	0	0
68	1	AI		0	0	0
69	1	TAM	discomfort of the whole body	0	0	0
70	1	TAM	hypertension；Hyperlipidemia	0	0	0
71	1	TAM		0	0	0
72	1	TAM		0	0	0
73	1	AI		0	0	0
74	1	TAM		0	0	0
75	0	0		0	0	0
76	1	TAM		0	0	0
77	1	TAM		0	0	0
78	1	TAM		0	0	0
79	0	0		0	0	0
80	1	AI		0	0	0
81	1	TAM	nausea	0	0	0
82	1	AI		0	0	0
83	1	TAM		0	0	0
84	1	TAM		0	0	0
85	1	AI	flatulence	0	0	0
86	1	AI		1	1	bone metastasis in November,2013
87	1	AI		0	0	0
88	1	TAM	uterine Leiomyoma，hysterectomy	0	0	0
89	0	0	joint pain；diabetes	0	0	0
90	1	AI	osteoporosis	0	0	0
91	1	TAM		0	0	0
92	1	AI	stomachache	0	0	0
93	1	TAM		0	0	0
94	1	AI		0	0	0
95	1	TAM		0	0	0
96	1	TAM		0	0	0
97	1	AI		0	0	0
98	0	0		0	0	0
99	0	0		0	0	0
100	1	AI		0	0	0
101	0	0	hypertension	0	0	0
102	0	0		0	0	0
103	1	TAM		0	0	0
104	1	AI		0	0	0
105	1	TAM		0	0	0
106	1	AI	osteoporosis	0	0	0
107	0	0		0	0	0
108	1	TAM		0	0	0
109	1	AI		0	0	0
110	1	AI		0	0	0
111	1	AI		0	0	0
112	1	TAM	osteoporosis；joint pain	0	0	0
113	1	TAM		0	0	0
114	1	TAM		0	0	0
115	1	TAM		0	0	0
116	1	TAM		0	0	0
117	0	0		1	1	bone metastasis in August,2013
118	1	AI		1	1	bone metastasis in December,2012
119	1	AI	osteoporosis；bone pain	0	0	0
120	1	TAM		0	0	0
121	1	TAM		0	0	0
122	1	AI		0	0	0
123	1	转换	osteoporosis	0	0	0
124	1	TAM		0	0	0
125	1	TAM	coronary heart disease；dyslipidemia；hot flashes	0	0	0
126	0	0		0	0	0
127	1	TAM		0	0	0
128	1	TAM		0	0	0
129	1	AI	osteoporosis	0	0	0
130	1	TAM		0	0	0
131	1	TAM		0	0	0
132	1	TAM		0	0	0
133	1	TAM		0	0	0
134	1	TAM		0	0	0
135	1	AI		0	0	0
136	1	AI		0	0	0
137	1	AI		0	0	0
138	1	TAM	osteoporosis；hyperlipidemia	0	0	0
139	1	TAM		0	0	0
140	0	0	fatigue，hyperhidrosis	0	0	0
141	1	转换	osteoporosis	0	0	0
142	1	TAM	endometrial thickening	0	0	0
143	1	AI		0	0	0
144	1	TAM		0	0	0
145	0	0		0	0	0
146	1	AI		0	0	0
147	1	TAM	joint pain	0	0	0
148	1	AI		0	0	0
149	1	TAM		0	0	0
150	1	TAM		0	0	0
151	1	TAM		0	0	0
152	1	TAM	joint pain	0	0	0
153	1	TAM		0	0	0
154	1	AI		0	0	0
155	1	TAM		0	0	0
156	1	TAM	joint swelling, dyspepsia, hot flashes	0	0	0
157	1	TAM		0	0	0
158	1	TAM		0	0	0
159	1	AI		0	0	0
160	0	0		0	0	0
161	1	TAM		0	0	0
162	1	TAM		0	0	0
163	1	AI		0	0	0
164	1	TAM		0	0	0
165	1	转换		1	1	bone metastasis in April,2013
166	0	0		0	0	0
167	1	AI		0	0	0
168	1	TAM		0	0	0
169	1	TAM		0	0	0
170	1	TAM		0	0	0
171	1	TAM		0	0	0
172	1	TAM		0	0	0
173	0	0		0	0	0
174	0	0		0	0	0
175	0	0		0	0	0
176	0	0	endometrial polyp	0	0	0
177	1	TAM		0	0	0
178	0	0		0	0	0
179	1	TAM		0	0	0
180	1	TAM	flatulence	0	0	0
181	1	TAM		0	0	0
182	1	TAM		0	0	0
183	1	TAM		0	0	0
184	1	TAM		0	0	0
185	1	TAM		0	0	0
186	0	0		0	0	0
187	1	TAM		0	0	0
188	1	TAM		0	0	0
189	1	TAM		0	0	0
190	1	AI	joint pain	0	0	0
191	1	TAM		0	0	0
192	0	0		0	0	0
193	1	TAM	abnormal liver function；vaginitis	0	0	0
194	1	AI		0	0	0
195	1	TAM		0	0	0
196	1	TAM	endometrial thickening	0	0	0
197	1	TAM		0	0	0
198	1	TAM	Hyperlipidemia	0	0	0
199	1	TAM	breast adenoma	0	0	0
200	0	0	hot flashes；hyperhidrosis	0	0	0
201	1	AI		0	0	0
202	1	AI		1	1	bone metastasis in December,2014
203	1	AI		0	0	0
204	1	TAM		0	0	0
205	1	TAM	vaginitis, irregular menstrual	0	0	0
206	1	TAM		0	0	0
207	1	AI		0	0	0
208	1	转换		0	0	0
209	1	TAM	discomfort in the whole body, hot flashes	0	0	0
210	1	TAM		0	0	0
211	1	TAM	endometrial thickening；hyperhidrosis；hot flashes；joint pain；hypocalcemia	0	0	0
212	1	TAM		0	0	0
213	1	TAM	breast pain and swelling	0	0	0
214	1	AI		0	0	0
215	0	0		0	0	0
216	1	AI		0	0	0
217	1	TAM		0	0	0
218	0	0		0	0	0
219	1	AI		0	0	0
220	1	AI		0	0	0
221	1	AI	joint pain	0	0	0
222	1	TAM	endometrial thickening	0	0	0
223	1	AI		0	0	0
224	1	TAM		0	0	0
225	1	TAM	joint pain	0	0	0
226	1	TAM	alopecia；joint pain；endometrial thickening；hot flashes	0	0	0
227	1	TAM		0	0	0
228	1	TAM		0	0	0
229	1	TAM		0	0	0
230	0	0		0	0	0
231	1	TAM		0	0	0
232	1	TAM		0	0	0
233	0	0		0	0	0
234	1	AI		0	0	0
235	1	TAM	edema, weight gain	0	0	0
236	1	TAM		0	0	0
237	1	AI		0	0	0
238	1	TAM	brain infarction, hyperlipidemia	0	0	0
239	1	TAM		0	0	0
240	0	0	hyperhidrosis；fatigue	0	0	0
241	1	TAM		1	1	cervical lymph node metastasis in April,2020
242	1	TAM		0	0	0
243	1	TAM		0	0	0
244	1	TAM	blurred vision	0	0	0
245	1	TAM		0	0	0
246	0	0	hysterectomy	0	0	0
247	1	AI		0	0	0
248	1	TAM		0	0	0
249	1	TAM		0	0	0
250	1	TAM		0	0	0
251	1	TAM	diabetes, joint pain	0	0	0
252	0	0		0	0	0
253	0	0		0	0	0
254	1	TAM	joint pain；endometrial thickening	0	0	0
255	1	AI		0	0	0
256	1	TAM		0	0	0
257	1	AI		0	0	0
258	1	TAM		0	0	0
259	1	TAM		0	0	0
260	1	TAM		0	0	0
261	1	TAM		0	0	0
262	1	TAM		0	0	0
263	1	TAM		0	0	0
264	1	AI		0	0	0
265	1	TAM		1	1	liver metastasis in January,2018
266	1	TAM	osteoporosis	0	0	0
267	1	TAM		0	0	0
268	1	TAM	Hyperlipidemia, abdominal pain, endometrial thickening	0	0	0
269	1	TAM		0	0	0
270	1	TAM		0	0	0
271	1	TAM		0	0	0
272	1	TAM		0	0	0
273	1	AI		0	0	0
274	0	0		0	0	0
275	1	TAM	osteoporosis；joint pain	0	0	0
276	1	TAM		0	0	0
277	0	0		0	0	0
278	1	TAM		0	0	0
279	1	TAM		0	0	0
280	1	TAM		0	0	0
281	1	AI		0	0	0
282	1	TAM		0	0	0
283	0	0		0	0	0
284	1	AI		0	0	0
285	0	0	heart trouble	0	0	0
286	1	TAM		0	0	0
287	0	0		0	0	0
288	1	TAM		0	0	0
289	0	0		0	0	0
290	1	TAM		0	0	0
291	0	0	thyrophyma	0	0	0
292	1	TAM		0	0	0
293	1	TAM		0	0	0
294	1	AI		0	0	0
295	1	TAM		0	0	0
296	1	TAM	fatty liver disease；abnormal liver function；Hyperlipidemia；hot flashes	0	0	0
297	1	TAM		0	0	0
298	1	TAM		0	0	0
299	1	TAM		0	0	0
300	1	转换		0	0	0
301	0	0		0	0	0
302	1	AI		0	0	0
303	0	0		0	0	0
304	1	TAM		0	0	0
305	1	AI		0	0	0
306	1	TAM		0	0	0
307	1	TAM		0	0	0
308	1	TAM		0	0	0
309	1	TAM	endometrial thickening	0	0	0
310	1	TAM		0	0	0
311	0	0		0	0	0
312	1	TAM		0	0	0
313	0	0		0	0	0
314	1	AI		1	1	local recurrence in December,2020
315	1	TAM		0	0	0
316	1	TAM		0	0	0
317	1	TAM		0	0	0
318	1	TAM		0	0	0
319	1	TAM	osteoporosis；joint pain；fatty liver disease；endometrial thickening；Hyperlipidemia	0	0	0
320	1	TAM	osteoporosis；joint pain；endometrial thickening，hysterectomy	0	0	0
321	1	AI		0	0	0
322	1	TAM		0	0	0
323	1	TAM	endometrial thickening	0	0	0
324	0	0		0	0	0
325	1	TAM	dyslipidemia；endometrial thickening	0	0	0
326	1	TAM	hypertension；Hyperlipidemia	1	1	local recurrence in December,2020
327	1	TAM		0	0	0
328	1	TAM		0	0	0
329	0	0		0	0	0
330	0	0		0	0	0
331	1	TAM	endometrial thickening	0	0	0
332	1	TAM	endometrial thickening	0	0	0
333	0	0		0	0	0
334	1	AI		0	0	0
335	1	TAM	heart trouble, dryness of vaginal mucosa	0	0	0
336	1	TAM		0	0	0
337	1	TAM	joint pain；dyslipidemia	0	0	0
338	1	TAM		0	0	0
339	1	TAM	hyperhidrosis	0	0	0
340	1	AI		0	0	0
341	1	TAM	menopause	0	0	0
342	1	AI		0	0	0
343	1	TAM		0	0	0
344	0	0		0	0	0
345	1	AI		0	0	0
346	1	TAM		0	0	0
347	1	AI		0	0	0
348	1	TAM		0	0	0
349	0	0		0	0	0
350	0	0		0	0	0
351	0	0		0	0	0
352	1	TAM		0	0	0
353	1	TAM		0	0	0
354	1	TAM		0	0	0
355	1	TAM		0	0	0
356	0	0		0	0	0
357	1	TAM	joint pain	0	0	0
358	1	TAM	endometrial thickening	0	0	0
359	1	TAM		0	0	0
360	1	TAM		0	0	0
361	1	AI		0	0	0
362	1	TAM		0	0	0
363	0	0		0	0	0
364	1	TAM	irregular menstrual, endometrial thickening；joint pain, hands and feer numbness	0	0	0
365	1	TAM		1	1	contralateral DCIS in May, 2014
366	1	TAM		0	0	0
367	1	AI		0	0	0
368	1	AI		0	0	0
369	1	TAM	hands and feet numbness	0	0	0
370	1	TAM	sense of hunger	0	0	0
371	1	AI		0	0	0
372	1	AI		0	0	0
373	1	TAM		0	0	0
374	1	AI		0	0	0
375	1	AI		0	0	0
376	0	0		0	0	0
377	1	转换	hyperlipidemia	0	0	0
378	0	0		0	0	0
379	1	TAM	nausea，hot flashes	0	0	0
380	1	TAM		0	0	0
381	1	转换		0	0	0
382	1	TAM		0	0	0
383	1	TAM		0	0	0
384	1	AI	diarrhea	0	0	0
385	1	TAM	endometrial cancer	0	0	0
386	1	AI	joint pain；insomnia	0	0	0
387	1	AI		0	0	0
388	0	0		0	0	0
389	1	TAM		0	0	0
390	0	0	uterine Leiomyoma；joint pain；	0	0	0
391	1	AI	hyperhidrosis，insomnia，nausea，vomit，hot flashes	1	1	bone metastasis in September, 2014
392	1	TAM		0	0	0
393	0	0		0	0	0
394	1	AI	nausea, dizziness, joint pain	1	1	contralateral DCIS in August, 2016
395	1	TAM	hot flashes，hyperhidrosis	0	0	0
396	1	TAM		0	0	0
397	1	AI		0	0	0
398	1	AI		0	0	0
399	1	AI		0	0	0
400	1	AI		0	0	0
401	1	TAM	headache	0	0	0
402	1	TAM		0	0	0
403	1	TAM	endometrial thickening	0	0	0
404	1	TAM		0	0	0
405	1	TAM		0	0	0
406	1	TAM		0	0	0
407	0	0		0	0	0
408	1	TAM		0	0	0
409	1	TAM		0	0	0
410	1	TAM		0	0	0
411	0	0		0	0	0
412	1	TAM		0	0	0
413	1	AI		0	0	0
414	1	TAM		0	0	0
415	1	TAM		0	0	0
416	0	0		0	0	0
417	1	TAM		0	0	0
418	1	TAM		0	0	0
419	1	TAM	vomit	0	0	0
420	1	AI		0	0	0
421	1	TAM	endometrial thickening	0	0	0
422	1	AI	bone pain、hands and feet numbness、stomachache	0	0	0
423	0	0		0	0	0
424	0	0	osteoporosis	0	0	0
425	1	TAM		0	0	0
426	1	TAM		0	0	0
427	1	TAM		0	0	0
428	1	TAM		0	0	0
429	1	TAM		0	0	0
430	1	TAM		0	0	0
431	1	AI		0	0	0
432	1	TAM		0	0	0
433	1	TAM		0	0	0
434	1	TAM	stomachache，eating disorder, depression	0	0	0
435	0	0		0	0	0
436	0	0		0	0	0
437	1	TAM		0	0	0
438	1	TAM	endometrial thickening	0	0	0
439	1	TAM	thirst	0	0	0
440	1	AI	joint pain，hyperlipidemia	0	0	0
441	0	0	joint pain	0	0	0
442	1	AI		0	0	0
443	1	TAM		0	0	0
444	1	TAM		0	0	0
445	0	0		0	0	0
446	0	0		0	0	0
447	1	TAM	endometrial thickening	0	0	0
448	0	0		0	0	0
449	1	TAM		0	0	0
450	0	0		0	0	0
451	1	TAM		0	0	0
452	1	AI		0	0	0
453	0	0		0	0	0
454	1	TAM		0	0	0
455	1	TAM		0	0	0
456	0	0		1	1	liver metastasis in May, 2016
457	1	TAM	joint pain，hypocalcemia	0	0	0
458	1	TAM	joint pain	0	0	0
459	1	TAM		0	0	0
460	1	TAM	joint pain，endometrial thickening	0	0	0
461	0	0		0	0	0
462	1	AI		0	0	0
463	1	TAM		0	0	0
464	0	0		0	0	0
465	1	TAM		0	0	0
466	0	0		0	0	0
467	0	0	diabetes, joint pain；hot flashes；hyperhidrosis	0	0	0
468	1	TAM	nausea, joint pain，hot flashes	0	0	0
469	1	TAM		0	0	0
470	0	0		0	0	0
471	1	TAM	endometrial thickening	0	0	0
472	0	0		0	0	0
473	0	0		0	0	0
474	1	TAM		0	0	0
475	1	TAM		0	0	0
476	1	TAM		0	0	0
477	1	TAM	stomachache	0	0	0
478	1	TAM		0	0	0
479	1	TAM		0	0	0
480	1	AI		0	0	0
481	1	TAM	coronary heart disease	0	0	0
482	1	TAM		0	0	0
483	1	AI		0	0	0
484	0	0		0	0	0
485	1	TAM	endometrial thickening，joint pain	0	0	0
486	0	0		0	0	0
487	1	TAM	endometrial thickening	0	0	0
488	1	AI	coronary heart disease	0	0	0
489	0	0		0	0	0
490	1	AI		0	0	0
491	0	0		0	0	0
492	1	TAM		0	0	0
493	1	TAM	abnormal liver function	0	0	0
494	1	TAM	endometrial cancer、bone pain	0	0	0
495	1	AI		0	0	0
496	1	TAM	endometrial thickening	0	0	0
497	0	0		0	0	0
498	1	TAM	endometrial thickening	0	0	0
499	0	0		0	0	0
500	1	TAM		0	0	0
501	1	TAM	irregular menstrual	0	0	0
502	1	AI		0	0	0
503	1	TAM		0	0	0
504	0	0		0	0	0
505	1	TAM	weight gain	0	0	0
506	0	0		0	0	0
507	0	0		0	0	0
508	0	0		0	0	0
509	1	TAM		0	0	0
510	0	0	Hyperlipidemia；uterine Leiomyoma	0	0	0
511	1	TAM		0	0	0
512	1	TAM		0	0	0
513	0	0	joint pain	0	0	0
514	1	TAM		0	0	0
515	1	AI		0	0	0
516	1	AI		0	0	0
517	0	0		0	0	0
518	1	AI	osteoporosis	0	0	0
519	1	TAM		0	0	0
520	0	0		0	0	0
521	0	0	osteoporosis, body numbness, hot flashes	0	0	0
522	1	TAM		0	0	0
523	1	TAM		0	0	0
524	1	TAM		0	0	0
525	1	TAM		0	0	0
526	0	0		0	0	0
527	0	0		0	0	0
528	1	TAM		0	0	0
529	1	TAM		0	0	0
530	0	0		0	0	0
531	1	TAM		0	0	0
532	0	0		0	0	0
533	1	TAM	stomachache	0	0	0
534	1	AI	joint pain	0	0	0
535	0	0		0	0	0
536	0	0		0	0	0
537	0	0		0	0	0
538	1	AI		0	0	0
539	1	TAM		0	0	0
540	1	TAM	endometrial thickening	0	0	0
541	1	TAM	dyslipidemia；endometrial thickening	0	0	0
542	0	0		0	0	0
543	0	0		0	0	0
544	0	0		0	0	0
545	0	0		0	0	0
546	1	TAM	discomfort of the whole body，hot flashes	0	0	0
547	0	0		0	0	0
548	0	0		0	0	0
549	0	0		0	0	0
550	0	0		0	0	0
551	1	TAM		0	0	0
552	1	AI		0	0	0
553	0	0		0	0	0
554	1	TAM	endometrial cancer	0	0	0
555	0	0		0	0	0
556	0	0		0	0	0
557	1	AI	osteoporosis	0	0	0
558	1	TAM	oint pain，hot flashes	0	0	0
559	0	0		0	0	0
560	1	TAM		0	0	0
561	1	TAM	endometrial cancer	1	1	local recurrence in December, 2020
562	0	0		0	0	0
563	1	TAM	osteoporosis	0	0	0
564	0	0		0	0	0
565	1	AI		0	0	0
566	1	TAM		0	0	0
567	1	AI		0	0	0
568	1	TAM		0	0	0
569	0	0		0	0	0
570	0	0		0	0	0
571	1	AI		0	0	0
572	1	AI	dyslipidemia	0	0	0
573	1	TAM		0	0	0
574	0	0		0	0	0
575	1	TAM	hyperhidrosis	0	0	0
576	1	TAM		0	0	0
577	1	TAM	joint pain，coronary heart disease，dyslipidemia，hot flashes，increased vaginal discharge	0	0	0
578	1	TAM	joint pain，dyslipidemia，coronary heart disease，hot flashes，increased vaginal discharge	0	0	0
579	1	TAM		0	0	0
580	1	TAM		0	0	0
581	1	TAM		1	1	brain metastasis in August, 2018
582	0	0		0	0	0
583	0	0		0	0	0
584	0	0		0	0	0
585	0	0		0	0	0
586	1	TAM	endometrial thickening	0	0	0
587	0	0		0	0	0
588	1	TAM		0	0	0
589	0	0		0	0	0
590	1	AI	osteoporosis	0	0	0
591	1	TAM		0	0	0
592	1	TAM		0	0	0
593	1	TAM	hysterectomy	0	0	0
594	1	AI	hypocalcemia	0	0	0
595	1	TAM	joint pain	0	0	0
596	0	0		0	0	0
597	1	AI		0	0	0
598	1	TAM		0	0	0
599	1	TAM	hot flashes、hyperhidrosis	0	0	0
600	0	0		0	0	0
601	1	TAM	endometrial thickening	0	0	0
602	1	TAM		0	0	0
603	1	AI		0	0	0
604	1	TAM		0	0	0
605	1	TAM		0	0	0
606	0	0		0	0	0
607	0	0		0	0	0
608	1	TAM		0	0	0
609	0	0	axilla pain and swelling，osteoporosis	0	0	0
610	1	AI		0	0	0
611	0	0		0	0	0
612	0	0		0	0	0
613	1	TAM	irregular menstrual	0	0	0
614	1	TAM	hot flashes	0	0	0
615	0	0		0	0	0
616	1	AI		0	0	0
617	1	TAM		0	0	0
618	1	TAM	osteoporosis，dyslipidemia，nausea，vomit	0	0	0
619	1	TAM	hypertension，hyperlipidemia, osteoporosis；hot flashes；hyperhidrosis	0	0	0
620	1	TAM	endometrial thickening	0	0	0
621	1	TAM		0	0	0
622	1	TAM	abnormal liver function	0	0	0
623	1	TAM	endometrial thickening；endometritis	0	0	0
624	1	TAM	osteoporosis，joint pain，heart disease，dyslipidemia，endometrial thickening	0	0	0
625	1	TAM	hot flashes, fatigue	0	0	0
626	0	0		0	0	0
627	0	0		0	0	0
628	0	0		0	0	0
629	0	0		0	0	0
630	1	TAM	poor memory，sleepiness	0	0	0
631	1	AI		0	0	0
632	1	TAM	osteoporosis	0	0	0
633	0	0		0	0	0
634	1	TAM	varicose veins, vaginal bleeding	0	0	0
635	1	TAM	Hyperlipidemia, hyperlipidemia, joint pain	0	0	0
636	1	AI	alopecia	0	0	0
637	1	TAM	weight gain, alopecia	0	0	0
638	0	0	hypocalcemia, hands and feet numbness, fatigue, hot flashes	0	0	0
639	0	0		0	0	0
640	1	TAM		0	0	0
641	1	TAM	bladder discomfort，abnormal liver function，endometrial thickening，joint pain，stomachache	0	0	0
642	1	TAM		1	1	abdominal cavity in December, 2017
643	1	TAM	endometrial thickening	0	0	0
644	1	TAM	endometrial thickening	0	0	0
645	0	0		0	0	0
646	1	TAM		0	0	0
647	1	TAM	endometrial thickening	0	0	0
648	1	AI	urinary disfunction，increased vaginal discharge	0	0	0
649	1	AI	joint pain，osteoporosis	0	0	0
650	1	AI		0	0	0
651	1	TAM	endometrial thickening，ovarian cyst	0	0	0
652	1	TAM	hypocalcemia，hot flashes，increased vaginal discharge，anemia	0	0	0
653	1	TAM		0	0	0
654	1	TAM	blurred vision	0	0	0
655	0	0		0	0	0
656	1	TAM		0	0	0
657	1	TAM	endometrial thickening	0	0	0
658	1	TAM		0	0	0
659	0	0		0	0	0
660	1	AI	joint pain；joint pain；dyslipidemia	0	0	0
661	1	AI	alopecia	0	0	0
662	1	TAM	diarrhea	0	0	0
663	1	AI		0	0	0
664	0	0		0	0	0
665	1	AI		0	0	0
666	0	0		1	1	abdominal cavity in July, 2020
667	1	TAM		0	0	0
668	1	TAM		0	0	0
669	1	TAM	endometrial thickening	0	0	0
670	1	AI	alopecia，hypertension	0	0	0
671	0	0	ovarian cyst	0	0	0
672	0	0		0	0	0
673	1	TAM		0	0	0
674	1	AI	osteoporosis，joint pain，dyslipidemia，abnormal liver function	0	0	0
675	1	TAM		0	0	0
676	1	AI		0	0	0
677	1	TAM	endometrial thickening	0	0	0
678	1	TAM	endometrial thickening	0	0	0
679	1	TAM	endometrial thickening	0	0	0
680	1	TAM		0	0	0
681	1	AI	fracture	0	0	0
682	1	TAM	endometrial thickening	0	0	0
683	1	TAM	endometrial thickening	0	0	0
684	1	TAM	endometrial thickening	0	0	0
685	1	TAM	endometrial thickening	0	0	0
686	1	TAM	endometrial thickening	0	0	0
687	1	AI		0	0	0
688	1	TAM	endometrial thickening	0	0	0
689	1	TAM	endometrial thickening	0	0	0
690	1	AI	osteoporosis	0	0	0
691	1	TAM	abnormal liver function	0	0	0
692	1	TAM	endometrial thickening	0	0	0
693	1	AI	osteoporosis	0	0	0
694	1	TAM	endometrial thickening	0	0	0
695	1	TAM	osteoporosis，hypocalcemia	0	0	0
696	1	TAM		0	0	0
697	1	TAM	endometrial thickening	0	0	0
698	1	TAM	endometrial thickening	0	0	0
699	1	AI		0	0	0
700	1	AI		0	0	0
701	1	TAM	endometrial thickening	0	0	0
702	1	TAM		0	0	0
703	1	转换		0	0	0
704	1	TAM	endometrial thickening	0	0	0
705	1	TAM	sactosalpinx	0	0	0
706	1	AI		0	0	0
707	1	TAM	endometrial thickening	0	0	0
708	1	TAM	endometrial thickening	0	0	0
709	1	TAM		0	0	0
710	1	AI	osteoporosis，joint pain	0	0	0
711	1	AI		0	0	0
712	0	0		0	0	0
713	1	TAM	weight gain	0	0	0
714	1	AI	osteoporosis，joint pain，hyperlipidemia	0	0	0
715	1	AI		0	0	0
716	1	TAM	abnormal liver function、Hyperlipidemia	0	0	0
717	1	AI	coronary heart disease	0	0	0
718	1	TAM		0	0	0
719	1	TAM		0	0	0
720	1	TAM		0	0	0
721	0	0		0	0	0
722	0	0	fatigue；joint pain；hyperhidrosis	0	0	0
723	0	0		0	0	0
724	1	转换		0	0	0
725	1	TAM		0	0	0
726	1	转换		0	0	0
727	1	TAM	rash	0	0	0
728	1	AI		0	0	0
729	1	TAM	ovarian cyst	0	0	0
730	1	TAM	endometrial thickening	0	0	0
731	1	AI		0	0	0
732	1	TAM	joint pain，increased vaginal discharge	0	0	0
733	1	TAM		0	0	0
734	1	AI	osteoporosis, hair growth	0	0	0
735	0	0		0	0	0
736	1	TAM		0	0	0
737	1	TAM		0	0	0
738	1	AI	joint pain，coronary heart disease，dyslipidemia	0	0	0
739	0	0	endometrial thickening	1	1	liver metastasis in March, 2021
740	1	TAM	hot flashes、endometrial thickening	0	0	0
741	1	TAM	joint pain，osteoporosis	0	0	0
742	1	AI		0	0	0
743	0	0		0	0	0
744	1	TAM	endometrial thickening, hot flashes, hyperhidrosis, nausea, vomit	0	0	0
745	1	TAM		0	0	0
746	1	switch	endometrial thickening，poor memory	0	0	0
747	0	0		0	0	0
748	1	TAM		0	0	0
749	1	AI		0	0	0
750	0	0	hypertension；uterine cyst；osteoporosis	0	0	0
751	1	AI		0	0	0
752	1	TAM	dysmenorrhea	0	0	0
753	1	TAM		0	0	0
754	1	TAM		0	0	0
755	1	TAM	joint pain	0	0	0
756	1	TAM		0	0	0
757	0	0		0	0	0
758	1	TAM	alopecia	0	0	0
759	1	TAM	hyperhidrosis, palpitation, insomnia,diabetes	0	0	0
760	1	TAM		0	0	0
761	1	TAM	abnormal liver function，joint pain	0	0	0
762	1	AI		0	0	0
763	1	TAM		0	0	0
764	0	0	joint pain	0	0	0
765	1	TAM	discomfort of the whole body	0	0	0
766	1	TAM		0	0	0
767	1	TAM		0	0	0
768	1	TAM		0	0	0
769	1	TAM		0	0	0
770	1	TAM		0	0	0
771	1	TAM		1	1	local recurrence in May, 2017
772	1	TAM	hyperlipidemia	0	0	0
773	1	TAM		0	0	0
774	1	TAM		0	0	0
775	1	AI		0	0	0
776	1	TAM	osteoporosis，hot flashes，endometrial thickening，increased vaginal discharge	0	0	0
777	1	AI		0	0	0
778	0	0		0	0	0
779	1	TAM	joint pain	0	0	0
780	1	TAM	fatigue；hypertension；Hyperlipidemia；joint pain；hyperhidrosis；hot flashes；hypocalcemia	0	0	0
781	1	AI		0	0	0
782	1	TAM		0	0	0
783	1	AI		0	0	0
784	1	TAM	increased vaginal discharge	0	0	0
785	1	TAM		0	0	0
786	0	0		0	0	0
787	1	TAM	joint pain，dyslipidemia，endometrial thickening，insomnia，discomfort of the whole body，hot flashes	0	0	0
788	1	AI	bone pain、osteoporosis	0	0	0
789	1	AI		0	0	0
790	1	AI	osteoporosis	0	0	0
791	1	TAM	back itch	0	0	0
792	1	TAM		0	0	0
793	1	TAM		0	0	0
794	1	TAM		0	0	0
795	1	AI		0	0	0
796	1	TAM	weight gain，Hyperlipidemia	0	0	0
797	0	0		0	0	0
798	1	TAM	joint pain	0	0	0
799	1	AI	joint pain	0	0	0
800	1	TAM	joint pain	0	0	0
801	1	TAM		0	0	0
802	1	TAM		0	0	0
803	0	0	uterine Leiomyoma	0	0	0
804	1	AI		0	0	0
805	0	0		0	0	0
806	1	TAM	osteoporosis，joint pain，endometrial thickening，endometrial polyp	0	0	0
807	1	TAM	alopecia	0	0	0
808	0	0		0	0	0
809	1	AI		0	0	0
810	1	TAM	blurred vision	0	0	0
811	1	TAM		0	0	0
812	1	TAM		0	0	0
813	1	TAM		0	0	0
814	1	TAM		0	0	0
815	1	AI	joint pain，osteoporosis	0	0	0
816	1	TAM		0	0	0
817	1	TAM		0	0	0
818	1	AI	hot flashes, osteoporosis	0	0	0
819	1	AI	endometrial thickening	0	0	0
820	1	AI		0	0	0
821	1	TAM		0	0	0
822	1	TAM	endometrial thickening	0	0	0
823	1	TAM	joint pain	0	0	0
824	1	TAM		0	0	0
825	1	TAM		0	0	0
826	1	TAM		0	0	0
827	1	TAM		0	0	0
828	1	AI		0	0	0
829	1	AI		0	0	0
830	0	0	headache, hyperhidrosis	0	0	0
831	1	TAM		0	0	0
832	1	AI		0	0	0
833	0	0	hypocalcemia；joint pain	0	0	0
834	0	0	endometrial thickening	0	0	0
835	1	AI	osteoporosis，joint pain；endometrial thickening	0	0	0
836	1	TAM		0	0	0
837	1	TAM	endometrial thickening，hysterectomy	0	0	0
838	1	AI	osteoporosis	0	0	0
839	1	TAM	endometrial thickening	0	0	0
840	1	AI		0	0	0
841	1	TAM	hot flashes	0	0	0
842	1	TAM		0	0	0
843	1	TAM	hot flashes；increased vaginal discharge	0	0	0
844	1	AI	hyperhidrosis	0	0	0
845	1	AI		0	0	0
846	1	TAM	endometrial thickening	0	0	0
847	1	TAM		0	0	0
848	1	TAM	osteoporosis	0	0	0
849	0	0		0	0	0
850	1	TAM	insomnia, fatigue, irritability	0	0	0
851	1	TAM	uterine Leiomyoma	0	0	0
852	1	TAM	hyperhidrosis、insomnia；uterine Leiomyoma	0	0	0
853	1	TAM	alopecia	0	0	0
854	1	TAM		0	0	0
855	1	TAM	osteoporosis	0	0	0
856	1	AI	increased vaginal discharge	0	0	0
857	1	AI		0	0	0
858	1	TAM		0	0	0
859	1	TAM		0	0	0
860	0	0		0	0	0
861	1	TAM		1	1	liver metastasis in December, 2017
862	0	0		0	0	0
863	1	TAM	endometrial thickening	0	0	0
864	0	0		0	0	0
865	1	转换		0	0	0
866	1	AI		0	0	0
867	1	TAM		0	0	0
868	0	0		0	0	0
869	1	AI	osteoporosis	0	0	0
870	1	AI	osteoporosis，joint pain	0	0	0
871	1	TAM		0	0	0
872	0	0		0	0	0
873	1	TAM		0	0	0
874	1	TAM		0	0	0
875	1	AI		0	0	0
876	0	0		0	0	0
877	1	AI	osteoporosis,fracture	0	0	0
878	1	TAM		0	0	0
879	1	TAM	stomachache	0	0	0
880	1	TAM		0	0	0
881	1	TAM		0	0	0
882	1	AI		0	0	0
883	1	TAM		0	0	0
884	1	TAM		0	0	0
885	1	TAM	endometrial thickening, joint pain, anemia	1	1	contralateral DCIS in April, 2019
886	1	AI	osteoporosis, fracture	0	0	0
887	1	AI		0	0	0
888	1	TAM		0	0	0
889	0	0		0	0	0
890	1	AI		0	0	0
891	1	AI		0	0	0
892	1	TAM	irregular menstrual	0	0	0
893	1	TAM	joint pain；hypocalcemia	0	0	0
894	1	TAM		0	0	0
895	1	TAM	leg pain	0	0	0
896	0	0		0	0	0
897	1	TAM		0	0	0
898	0	0	hot flashes；hyperhidrosis；fatigue	0	0	0
899	1	AI		0	0	0
900	1	TAM		0	0	0
901	1	TAM	cervical polyp	0	0	0
902	1	TAM		0	0	0
903	1	TAM		0	0	0
904	1	TAM		0	0	0
905	0	0		0	0	0
906	0	0		0	0	0
907	1	AI		0	0	0
908	1	TAM	abnormal liver function	0	0	0
909	1	TAM		0	0	0
910	1	TAM		0	0	0
911	1	TAM	endometrial thickening	0	0	0
912	1	AI		0	0	0
913	1	TAM		0	0	0
914	1	TAM		0	0	0
915	1	TAM		0	0	0
916	1	AI	joint pain；osteoporosis	0	0	0
917	1	AI		0	0	0
918	1	AI	osteoporosis, sleepiness	0	0	0
919	1	AI	osteoporosis	0	0	0
920	1	AI	hot flashes	0	0	0
921	1	TAM		0	0	0
922	1	TAM		0	0	0
923	1	AI		0	0	0
924	1	转换		0	0	0
925	0	0	osteoporosis	0	0	0
926	1	TAM	endometrial thickening	0	0	0
927	1	AI	bone pain, abnormal liver function, edema, discomfort of the whole body	0	0	0
928	1	TAM		0	0	0
929	0	0		0	0	0
930	0	0		0	0	0
931	1	AI	nausea；hot flashes	0	0	0
932	0	0		0	0	0
933	1	TAM		0	0	0
934	1	TAM		0	0	0
935	1	TAM		0	0	0
936	1	TAM		0	0	0
937	1	TAM		0	0	0
938	1	TAM	endometrial thickening	0	0	0
939	1	TAM		0	0	0
940	0	0		0	0	0
941	0	0		0	0	0
942	1	TAM	Hyperlipidemia	0	0	0
943	1	TAM		0	0	0
944	1	TAM		0	0	0
945	0	0		0	0	0
946	0	0		0	0	0
947	1	TAM	endometrial thickening	0	0	0
948	1	TAM	urinary disfunction, increased vaginal discharge	0	0	0
949	1	AI		0	0	0
950	1	TAM		0	0	0
951	1	TAM	endometrial thickening	0	0	0
952	1	TAM		0	0	0
953	1	TAM	endometrial thickening	0	0	0
954	1	AI		0	0	0
955	1	TAM		0	0	0
956	0	0	fatigue；hot flashes	0	0	0
957	1	TAM		0	0	0
958	1	TAM		0	0	0
959	1	AI	osteoporosis	0	0	0
960	1	AI	bone pain；alopecia	0	0	0
961	1	AI	osteoporosis	0	0	0
962	1	TAM	menopause	0	0	0
963	0	0		0	0	0
964	1	AI	joint pain	0	0	0
965	1	TAM	discomfort in the whole body；hot flashes	0	0	0
966	1	TAM		0	0	0
967	1	TAM	endometrial thickening	0	0	0
968	0	0		0	0	0
969	1	TAM		0	0	0
970	1	AI	osteoporosis	0	0	0
971	1	TAM		0	0	0
972	1	TAM		0	0	0
973	1	TAM		0	0	0
974	1	TAM		0	0	0
975	0	0		0	0	0
976	0	0		0	0	0
977	0	0		0	0	0
978	1	AI	bone pain, joint pain, discomfort of the whole body	0	0	0
979	1	TAM		0	0	0
980	0	0	endometrial thickening，osteoporosis，whole body pain	0	0	0
981	1	AI	bone pain	0	0	0
982	1	TAM	abnormal liver function；endometrial thickening	0	0	0
983	0	0	joint pain；hypocalcemia	0	0	0
984	1	TAM		0	0	0
985	1	TAM	osteoporosis，joint pain；hot flashes；endometrial thickening；increased vaginal discharge	0	0	0
986	1	转换		0	0	0
987	1	TAM	insomnia	0	0	0
988	1	TAM	rash	0	0	0
989	1	AI		0	0	0
990	1	TAM	endometrial thickening，joint pain	0	0	0
991	0	0	hypertension；joint pain；uterine Leiomyoma；hysterectomy；hyperhidrosis	0	0	0
992	1	转换		0	0	0
993	1	TAM		0	0	0
994	1	TAM		0	0	0
995	1	TAM	fatigue；endometrial thickening	0	0	0
996	0	0		0	0	0
997	1	TAM	endometrial thickening，hysterectomy	0	0	0
998	1	TAM		0	0	0
999	1	AI		0	0	0
1000	1	TAM		0	0	0
1001	1	TAM		0	0	0
1002	1	TAM	increased vaginal discharge	0	0	0
1003	1	AI	insomnia	0	0	0
1004	1	TAM		0	0	0
1005	1	TAM		0	0	0
1006	0	0		0	0	0
1007	1	AI		0	0	0
