# Supplementary material for: Efficacy and safety of endocrine therapy after mastectomy in patients with hormone receptor positive breast ductal carcinoma in situ: Retrospective cohort study
Source: eLife. 2023 Feb 6;12:e83045. doi: 10.7554/eLife.83045 (PMC9901931; doi:10.7554/eLife.83045)
Supplement: Table 3—source data 1. [file elife-83045-table3-data1.xlsx]

## Sheet: Sheet1
No.	Age	Age（>50）	T stage	Microinvasive	Tumor Grade（level 3）	ER Level（>10%）	Ki67 level (<15%)	Multifocal	bilateral mastectomy	ET	Drug type	Adverse events	Recurrence/metastasis	Recurrence/metastasis	Time and site
1	42	0	T1	1	0	1	1	0	0	1	TAM	endometrial thickening	0	0	0
2	50	0	T1	0	0	0	1	0	0	0	0		0	0	0
3	65	1	T1	0	0	0	1	0	0	0	0		0	0	0
4	47	0	T1	1	0	0	1	0	0	0	0		0	0	0
5	32	0	T1	0	0	0	1	0	0	0	0		0	0	0
6	42	0	T1	0	0	0	1	0	0	1	TAM	joint pain；increased vaginal discharge	0	0	0
7	58	1	T1	1	0	0	0	0	0	1	TAM		0	0	0
8	45	0	T1	1	0	1	1	0	0	0	0		0	0	0
9	71	1	T1	0	0	0	1	0	0	1	AI	osteoporosis,ulna fracture in 2018	0	0	0
10	56	1	T2	1	0	1	1	0	0	1	AI	elevated hepatic transaminases	0	0	0
11	61	1	T1	0	0	1	1	0	0	1	AI	osteoporosis	0	0	0
12	47	0	T1	0	0	1	1	0	0	0	0		0	0	0
13	46	0	T1	1	0	1	1	0	0	0	0		0	0	0
14	46	0	T1	1	0	1	1	0	0	1	TAM	endometrial thickening	0	0	0
15	72	1	T1	0	0	1	1	0	0	0	0		0	0	0
16	44	0	T1	0	0	1	1	0	0	1	AI		0	0	0
17	74	1	T1	0	0	1	1	0	0	1	TAM	joint pain	0	0	0
18	72	1	T1	1	0	1	1	0	0	0	0		0	0	0
19	69	1	T2	1	1	1	1	0	0	1	AI		0	0	0
20	46	0	T1	0	0	1	1	0	0	0	0		0	0	0
21	61	1	T1	1	0	1	1	0	0	0	0		0	0	0
22	53	1	T1	1	0	1	1	0	0	1	TAM	joint pain	0	0	0
23	45	0	T2	1	0	1	1	1	0	0	0		0	0	0
24	49	0	T2	0	0	1	1	1	0	1	TAM		0	0	0
25	41	0	T1	1	0	1	1	0	0	1	TAM		0	0	0
26	42	0	T1	0	0	1	1	0	0	0	0		0	0	0
27	47	0	T1	0	0	0	1	0	0	0	0		0	0	0
28	46	0	T1	0	0	0	1	0	0	1	AI	joint pain；osteoporosis；hypertension；Hyperlipidemia	0	0	0
29	51	1	T1	0	0	0	1	0	1	1	TAM		0	0	0
30	75	1	T1	1	0	1	1	0	0	1	AI	coronary heart disease	0	0	0
31	39	0	T2	1	0	1	1	0	0	1	TAM		0	0	0
32	52	1	T1	1	1	1	1	0	0	1	AI		0	0	0
33	55	1	T1	0	0	1	0	0	0	0	0		0	0	0
34	51	1	T1	1	0	1	1	0	0	0	0		0	0	0
35	70	1	T1	0	0	1	1	0	0	1	TAM	joint pain	0	0	0
36	53	1	T1	1	0	1	1	0	0	0	0		0	0	0
37	43	0	T2	0	0	1	1	0	0	1	TAM		0	0	0
38	60	1	T2	1	0	1	1	0	0	0	0		0	0	0
39	38	0	T1	1	1	1	1	0	0	1	TAM		0	0	0
40	47	0	T1	0	0	1	1	0	0	1	TAM	joint pain；endometrial thickening	0	0	0
41	68	1	T1	0	1	1	1	0	0	1	转换		0	0	0
42	46	0	T1	0	0	1	1	0	0	1	TAM		0	0	0
43	34	0	T2	1	1	1	1	0	0	1	AI		0	0	0
44	68	1	T2	0	1	1	1	1	0	1	AI	hypertension	0	0	0
45	53	1	T2	1	1	1	1	0	0	1	AI	osteoporosis	1	1	bone metastasis in May,2016
46	48	0	T2	1	0	1	1	0	0	1	TAM		0	0	0
47	42	0	T1	1	1	1	0	0	0	1	TAM		0	0	0
48	75	1	T1	0	0	1	1	0	0	1	AI	stomachache	0	0	0
49	50	0	T1	0	0	1	1	0	0	1	TAM		0	0	0
50	65	1	T2	0	0	1	1	1	0	1	AI		1	1	lung metastasis in September,2011
51	58	1	T1	0	0	1	1	0	0	1	AI	acid reflux	0	0	0
52	49	0	T1	1	1	1	1	0	0	1	AI		0	0	0
53	43	0	T1	0	0	1	1	0	0	1	TAM		0	0	0
54	58	1	T2	1	1	1	0	0	0	1	AI		0	0	0
55	42	0	T1	0	0	1	1	0	0	1	AI	joint pain	0	0	0
56	64	1	T2	0	1	1	1	0	0	1	AI		0	0	0
57	44	0	T2	0	0	1	1	0	0	1	AI	abnormal liver function	0	0	0
58	54	1	T2	0	0	1	1	0	0	1	AI	hot flashes，endometrial thickening	0	0	0
59	62	1	T1	0	0	1	1	0	0	1	AI		0	0	0
60	37	0	T1	0	0	1	1	0	0	0	0		0	0	0
61	53	1	T1	0	0	1	1	0	0	1	转换	endometrial thickening	0	0	0
62	49	0	T1	1	0	1	1	0	0	1	TAM		0	0	0
63	48	0	T1	1	0	1	1	0	0	0	0		0	0	0
64	42	0	T1	0	0	1	1	0	0	1	TAM	joint pain	0	0	0
65	51	1	T2	0	1	1	1	0	0	0	0		0	0	0
66	55	1	T1	1	1	1	0	0	0	1	AI		0	0	0
67	62	1	T2	1	0	1	0	0	0	1	AI		0	0	0
68	54	1	T1	0	1	1	1	0	0	1	AI		0	0	0
69	46	0	T1	0	0	1	1	0	0	1	TAM	discomfort of the whole body	0	0	0
70	34	0	T1	0	0	1	1	0	0	1	TAM	hypertension；Hyperlipidemia	0	0	0
71	61	1	T1	0	0	1	1	0	0	1	TAM		0	0	0
72	43	0	T1	1	0	1	1	0	0	1	TAM		0	0	0
73	38	0	T1	0	0	1	1	0	0	1	AI		0	0	0
74	59	1	T3	0	0	0	1	0	0	1	TAM		0	0	0
75	45	0	T2	0	0	0	1	0	0	0	0		0	0	0
76	49	0	T1	0	1	0	1	0	0	1	TAM		0	0	0
77	38	0	T1	0	0	0	1	0	0	1	TAM		0	0	0
78	61	1	T1	0	0	0	1	0	0	1	TAM		0	0	0
79	56	1	T2	0	0	0	1	0	0	0	0		0	0	0
80	70	1	T2	0	0	0	1	0	0	1	AI		0	0	0
81	53	1	T1	0	0	0	1	0	0	1	TAM	nausea	0	0	0
82	71	1	T1	1	0	0	1	0	0	1	AI		0	0	0
83	49	0	T1	1	0	0	1	0	0	1	TAM		0	0	0
84	50	0	T1	0	0	0	1	0	0	1	TAM		0	0	0
85	55	1	T1	0	1	0	1	0	0	1	AI	flatulence	0	0	0
86	42	0	T1	1	1	0	0	0	0	1	AI		1	1	bone metastasis in November,2013
87	56	1	T1	1	1	0	0	0	0	1	AI		0	0	0
88	49	0	T1	0	1	0	1	0	0	1	TAM	uterine Leiomyoma，hysterectomy	0	0	0
89	47	0	T1	0	0	0	1	0	0	0	0	joint pain；diabetes	0	0	0
90	72	1	T2	0	0	0	1	0	0	1	AI	osteoporosis	0	0	0
91	45	0	T1	0	0	0	1	0	0	1	TAM		0	0	0
92	70	1	T1	0	1	0	0	0	0	1	AI	stomachache	0	0	0
93	48	0	T1	0	0	0	1	0	0	1	TAM		0	0	0
94	74	1	T1	0	0	0	1	0	0	1	AI		0	0	0
95	47	0	T1	0	1	0	1	0	0	1	TAM		0	0	0
96	72	1	T1	0	0	0	1	0	0	1	TAM		0	0	0
97	52	1	T1	0	0	0	1	0	0	1	AI		0	0	0
98	44	0	T2	1	0	0	0	0	0	0	0		0	0	0
99	78	1	T1	0	0	0	1	0	0	0	0		0	0	0
100	81	1	T1	0	1	0	0	0	0	1	AI		0	0	0
101	42	0	T1	1	0	0	1	0	0	0	0	hypertension	0	0	0
102	44	0	T2	0	0	0	1	0	0	0	0		0	0	0
103	36	0	T2	0	0	0	1	0	0	1	TAM		0	0	0
104	52	1	T1	0	1	0	1	0	0	1	AI		0	0	0
105	45	0	T1	0	0	0	1	0	0	1	TAM		0	0	0
106	56	1	T1	0	1	0	1	0	0	1	AI	osteoporosis	0	0	0
107	38	0	T1	0	0	0	1	0	0	0	0		0	0	0
108	48	0	T2	0	1	0	1	0	0	1	TAM		0	0	0
109	53	1	T1	1	1	0	0	0	0	1	AI		0	0	0
110	49	0	T1	1	1	0	0	0	0	1	AI		0	0	0
111	68	1	T1	1	0	0	0	0	0	1	AI		0	0	0
112	45	0	T1	0	0	0	1	0	0	1	TAM	osteoporosis；joint pain	0	0	0
113	45	0	T1	0	0	0	1	0	0	1	TAM		0	0	0
114	47	0	T3	0	0	0	1	0	0	1	TAM		0	0	0
115	38	0	T2	0	0	0	1	0	0	1	TAM		0	0	0
116	50	0	T2	0	0	0	1	0	0	1	TAM		0	0	0
117	62	1	T2	0	1	0	1	0	0	0	0		1	1	bone metastasis in August,2013
118	32	0	T2	1	1	0	1	0	0	1	AI		1	1	bone metastasis in December,2012
119	57	1	T2	0	0	0	1	0	0	1	AI	osteoporosis；bone pain	0	0	0
120	38	0	T1	0	0	0	1	0	0	1	TAM		0	0	0
121	38	0	T2	0	0	0	1	0	0	1	TAM		0	0	0
122	60	1	T1	0	0	0	0	0	0	1	AI		0	0	0
123	41	0	T1	0	0	0	1	0	0	1	转换	osteoporosis	0	0	0
124	41	0	T1	0	1	0	0	0	0	1	TAM		0	0	0
125	47	0	T1	0	0	0	1	0	0	1	TAM	coronary heart disease；dyslipidemia；hot flashes	0	0	0
126	48	0	T1	0	0	0	0	0	0	0	0		0	0	0
127	44	0	T1	0	0	0	1	1	0	1	TAM		0	0	0
128	31	0	T2	0	0	0	1	0	0	1	TAM		0	0	0
129	63	1	T2	0	0	0	1	0	0	1	AI	osteoporosis	0	0	0
130	37	0	T2	0	0	0	1	0	0	1	TAM		0	0	0
131	48	0	T1	0	0	0	1	0	0	1	TAM		0	0	0
132	37	0	T2	0	1	0	1	0	0	1	TAM		0	0	0
133	51	1	T2	0	1	0	1	0	0	1	TAM		0	0	0
134	38	0	T1	0	0	0	1	0	0	1	TAM		0	0	0
135	64	1	T2	0	0	0	0	0	0	1	AI		0	0	0
136	64	1	T2	0	0	0	0	0	0	1	AI		0	0	0
137	74	1	T2	0	0	0	1	0	0	1	AI		0	0	0
138	42	0	T1	0	0	0	1	0	0	1	TAM	osteoporosis；hyperlipidemia	0	0	0
139	46	0	T1	0	1	0	1	0	0	1	TAM		0	0	0
140	58	1	T3	0	0	0	1	0	0	0	0	fatigue，hyperhidrosis	0	0	0
141	48	0	T2	0	1	0	1	0	0	1	转换	osteoporosis	0	0	0
142	69	1	T2	0	0	0	1	0	0	1	TAM	endometrial thickening	0	0	0
143	53	1	T1	0	1	0	1	0	0	1	AI		0	0	0
144	32	0	T2	0	0	0	1	0	0	1	TAM		0	0	0
145	66	1	T2	0	0	0	1	0	0	0	0		0	0	0
146	70	1	T1	0	1	0	1	0	0	1	AI		0	0	0
147	70	1	T1	0	0	0	1	1	0	1	TAM	joint pain	0	0	0
148	72	1	T1	0	0	0	1	0	0	1	AI		0	0	0
149	40	0	T1	0	0	0	1	0	0	1	TAM		0	0	0
150	40	0	T1	0	0	0	1	0	1	1	TAM		0	0	0
151	35	0	T2	0	0	0	1	1	0	1	TAM		0	0	0
152	44	0	T1	0	0	1	1	0	0	1	TAM	joint pain	0	0	0
153	71	1	T1	0	0	1	1	0	0	1	TAM		0	0	0
154	73	1	T1	0	0	1	1	0	0	1	AI		0	0	0
155	54	1	T1	1	1	1	1	0	0	1	TAM		0	0	0
156	40	0	T2	0	0	1	1	0	0	1	TAM	joint swelling, dyspepsia, hot flashes	0	0	0
157	35	0	T1	0	0	1	1	0	0	1	TAM		0	0	0
158	38	0	T2	1	0	1	0	0	0	1	TAM		0	0	0
159	57	1	T2	0	0	1	1	0	0	1	AI		0	0	0
160	59	1	T1	0	0	1	1	0	0	0	0		0	0	0
161	39	0	T1	0	0	1	1	0	0	1	TAM		0	0	0
162	41	0	T1	0	0	1	1	0	0	1	TAM		0	0	0
163	55	1	T1	0	0	1	1	0	1	1	AI		0	0	0
164	29	0	T3	0	0	1	1	0	0	1	TAM		0	0	0
165	49	0	T1	1	1	1	0	0	0	1	转换		1	1	bone metastasis in April,2013
166	48	0	T2	0	0	1	1	0	0	0	0		0	0	0
167	61	1	T1	0	0	1	1	0	0	1	AI		0	0	0
168	49	0	T2	0	0	1	1	0	0	1	TAM		0	0	0
169	48	0	T1	0	0	1	0	0	0	1	TAM		0	0	0
170	32	0	T2	1	1	1	1	0	0	1	TAM		0	0	0
171	47	0	T2	0	0	1	1	0	0	1	TAM		0	0	0
172	47	0	T1	0	0	1	1	0	0	1	TAM		0	0	0
173	36	0	T2	0	1	1	1	0	0	0	0		0	0	0
174	60	1	T1	0	0	1	1	0	0	0	0		0	0	0
175	48	0	T2	0	1	1	1	0	0	0	0		0	0	0
176	44	0	T1	0	0	1	1	0	0	0	0	endometrial polyp	0	0	0
177	40	0	T1	0	1	1	1	0	0	1	TAM		0	0	0
178	54	1	T1	0	0	1	1	0	0	0	0		0	0	0
179	67	1	T1	0	0	1	1	0	0	1	TAM		0	0	0
180	42	0	T1	0	0	1	0	0	0	1	TAM	flatulence	0	0	0
181	47	0	T2	0	0	1	1	1	0	1	TAM		0	0	0
182	50	0	T1	0	1	1	0	0	0	1	TAM		0	0	0
183	72	1	T2	0	1	1	1	0	0	1	TAM		0	0	0
184	39	0	T1	0	0	0	1	0	0	1	TAM		0	0	0
185	44	0	T2	0	1	1	1	0	0	1	TAM		0	0	0
186	45	0	T1	0	1	1	1	0	0	0	0		0	0	0
187	50	0	T2	0	0	1	1	0	0	1	TAM		0	0	0
188	61	1	T2	0	0	1	0	0	0	1	TAM		0	0	0
189	73	1	T2	0	0	1	1	0	0	1	TAM		0	0	0
190	76	1	T1	0	0	1	1	0	0	1	AI	joint pain	0	0	0
191	48	0	T1	0	1	0	0	0	0	1	TAM		0	0	0
192	44	0	T1	0	0	1	1	0	1	0	0		0	0	0
193	48	0	T2	0	0	1	1	0	0	1	TAM	abnormal liver function；vaginitis	0	0	0
194	53	1	T2	0	0	1	1	0	0	1	AI		0	0	0
195	53	1	T1	0	1	1	1	0	0	1	TAM		0	0	0
196	40	0	T1	0	1	1	1	0	0	1	TAM	endometrial thickening	0	0	0
197	46	0	T1	1	1	1	0	0	0	1	TAM		0	0	0
198	41	0	T1	0	1	1	1	0	0	1	TAM	Hyperlipidemia	0	0	0
199	47	0	T1	0	0	1	1	0	0	1	TAM	breast adenoma	0	0	0
200	45	0	T3	0	1	1	0	0	0	0	0	hot flashes；hyperhidrosis	0	0	0
201	76	1	T2	0	0	1	1	0	0	1	AI		0	0	0
202	53	1	T3	0	0	1	0	0	0	1	AI		1	1	bone metastasis in December,2014
203	59	1	T1	0	0	1	1	0	0	1	AI		0	0	0
204	46	0	T2	0	0	1	1	0	0	1	TAM		0	0	0
205	32	0	T2	1	0	1	1	0	0	1	TAM	vaginitis, irregular menstrual	0	0	0
206	32	0	T1	0	0	1	1	0	0	1	TAM		0	0	0
207	71	1	T1	1	0	1	0	0	0	1	AI		0	0	0
208	50	0	T1	0	1	1	1	0	0	1	转换		0	0	0
209	48	0	T2	0	0	1	1	0	0	1	TAM	discomfort in the whole body, hot flashes	0	0	0
210	73	1	T1	0	0	1	1	0	0	1	TAM		0	0	0
211	41	0	T2	0	0	0	1	0	0	1	TAM	endometrial thickening；hyperhidrosis；hot flashes；joint pain；hypocalcemia	0	0	0
212	41	0	T1	0	0	1	1	0	0	1	TAM		0	0	0
213	43	0	T2	0	0	1	1	0	0	1	TAM	breast pain and swelling	0	0	0
214	70	1	T1	0	0	1	1	0	0	1	AI		0	0	0
215	59	1	T1	0	0	0	1	0	0	0	0		0	0	0
216	75	1	T1	0	0	1	1	0	0	1	AI		0	0	0
217	52	1	T1	0	0	1	1	0	0	1	TAM		0	0	0
218	39	0	T1	0	0	1	1	0	0	0	0		0	0	0
219	75	1	T2	0	0	1	0	0	0	1	AI		0	0	0
220	60	1	T1	0	0	1	1	0	0	1	AI		0	0	0
221	58	1	T1	0	0	0	1	0	0	1	AI	joint pain	0	0	0
222	37	0	T1	0	0	0	1	0	0	1	TAM	endometrial thickening	0	0	0
223	60	1	T2	0	0	0	0	0	0	1	AI		0	0	0
224	49	0	T1	0	0	1	1	0	0	1	TAM		0	0	0
225	48	0	T1	0	0	1	1	0	0	1	TAM	joint pain	0	0	0
226	53	1	T1	0	0	1	1	0	0	1	TAM	alopecia；joint pain；endometrial thickening；hot flashes	0	0	0
227	33	0	T2	0	0	0	1	0	0	1	TAM		0	0	0
228	45	0	T2	0	1	0	1	0	0	1	TAM		0	0	0
229	49	0	T2	0	0	0	1	0	0	1	TAM		0	0	0
230	43	0	T1	0	0	0	1	1	0	0	0		0	0	0
231	50	0	T2	0	0	0	1	0	0	1	TAM		0	0	0
232	46	0	T1	0	0	0	1	0	0	1	TAM		0	0	0
233	38	0	T2	0	0	0	0	0	0	0	0		0	0	0
234	86	1	T2	1	0	0	0	0	0	1	AI		0	0	0
235	39	0	T1	0	0	0	1	0	0	1	TAM	edema, weight gain	0	0	0
236	45	0	T1	0	0	0	1	0	0	1	TAM		0	0	0
237	80	1	T1	0	0	0	1	0	1	1	AI		0	0	0
238	49	0	T1	1	0	0	1	0	0	1	TAM	brain infarction, hyperlipidemia	0	0	0
239	46	0	T1	1	0	0	0	0	0	1	TAM		0	0	0
240	61	1	T1	0	0	0	1	0	0	0	0	hyperhidrosis；fatigue	0	0	0
241	33	0	T2	0	1	1	1	0	0	1	TAM		1	1	cervical lymph node metastasis in April,2020
242	43	0	T1	0	0	1	1	0	0	1	TAM		0	0	0
243	33	0	T2	1	1	1	0	0	0	1	TAM		0	0	0
244	49	0	T1	0	1	0	1	0	0	1	TAM	blurred vision	0	0	0
245	41	0	T1	0	1	0	1	0	0	1	TAM		0	0	0
246	43	0	T3	0	0	0	1	0	0	0	0	hysterectomy	0	0	0
247	61	1	T1	0	0	0	1	0	0	1	AI		0	0	0
248	52	1	T1	1	0	0	0	0	0	1	TAM		0	0	0
249	53	1	T3	0	0	0	1	0	0	1	TAM		0	0	0
250	28	0	T2	0	0	0	0	0	0	1	TAM		0	0	0
251	45	0	T2	0	0	0	1	0	0	1	TAM	diabetes, joint pain	0	0	0
252	51	1	T2	0	1	0	1	1	0	0	0		0	0	0
253	53	1	T1	0	1	0	1	0	0	0	0		0	0	0
254	31	0	T2	1	1	0	1	0	0	1	TAM	joint pain；endometrial thickening	0	0	0
255	60	1	T2	0	0	0	1	0	0	1	AI		0	0	0
256	57	1	T1	0	0	0	0	0	0	1	TAM		0	0	0
257	65	1	T1	1	1	0	0	0	0	1	AI		0	0	0
258	75	1	T3	0	1	0	1	0	0	1	TAM		0	0	0
259	54	1	T2	0	0	0	1	0	0	1	TAM		0	0	0
260	53	1	T1	1	0	1	0	0	0	1	TAM		0	0	0
261	48	0	T1	0	0	1	1	0	0	1	TAM		0	0	0
262	49	0	T1	0	0	0	1	0	0	1	TAM		0	0	0
263	28	0	T2	0	0	1	1	0	0	1	TAM		0	0	0
264	76	1	T3	0	0	1	0	0	0	1	AI		0	0	0
265	45	0	T2	0	0	1	1	0	0	1	TAM		1	1	liver metastasis in January,2018
266	75	1	T1	0	0	1	1	0	0	1	TAM	osteoporosis	0	0	0
267	45	0	T2	1	0	1	1	0	0	1	TAM		0	0	0
268	50	0	T1	0	1	1	1	0	0	1	TAM	Hyperlipidemia, abdominal pain, endometrial thickening	0	0	0
269	56	1	T2	0	0	1	1	0	0	1	TAM		0	0	0
270	54	1	T2	0	0	1	1	0	0	1	TAM		0	0	0
271	38	0	T1	1	1	1	0	0	0	1	TAM		0	0	0
272	33	0	T1	0	1	1	1	0	1	1	TAM		0	0	0
273	63	1	T1	0	1	1	1	0	0	1	AI		0	0	0
274	57	1	T1	1	0	1	1	0	0	0	0		0	0	0
275	58	1	T1	1	0	1	0	0	0	1	TAM	osteoporosis；joint pain	0	0	0
276	48	0	T2	0	1	1	1	0	0	1	TAM		0	0	0
277	80	1	T1	0	0	1	1	0	0	0	0		0	0	0
278	47	0	T1	0	0	1	1	1	0	1	TAM		0	0	0
279	73	1	T1	0	0	1	1	0	0	1	TAM		0	0	0
280	31	0	T1	0	0	1	1	0	0	1	TAM		0	0	0
281	57	1	T1	0	0	1	0	0	0	1	AI		0	0	0
282	50	0	T1	0	0	0	1	0	0	1	TAM		0	0	0
283	43	0	T1	0	0	0	1	0	0	0	0		0	0	0
284	73	1	T1	0	0	0	1	0	0	1	AI		0	0	0
285	49	0	T1	0	1	0	1	0	0	0	0	heart trouble	0	0	0
286	72	1	T1	0	0	0	1	0	0	1	TAM		0	0	0
287	38	0	T1	0	1	0	0	0	0	0	0		0	0	0
288	44	0	T1	0	1	0	0	0	0	1	TAM		0	0	0
289	44	0	T2	1	1	0	0	0	0	0	0		0	0	0
290	56	1	T2	1	0	0	0	0	0	1	TAM		0	0	0
291	53	1	T2	0	0	0	1	0	0	0	0	thyrophyma	0	0	0
292	33	0	T1	1	1	0	1	0	0	1	TAM		0	0	0
293	58	1	T2	1	0	0	0	0	0	1	TAM		0	0	0
294	58	1	T1	0	0	0	1	0	0	1	AI		0	0	0
295	46	0	T2	0	0	0	1	0	0	1	TAM		0	0	0
296	46	0	T1	0	1	0	1	0	0	1	TAM	fatty liver disease；abnormal liver function；Hyperlipidemia；hot flashes	0	0	0
297	40	0	T2	1	1	0	1	0	0	1	TAM		0	0	0
298	49	0	T1	0	1	0	1	0	0	1	TAM		0	0	0
299	53	1	T1	1	0	1	1	1	0	1	TAM		0	0	0
300	63	1	T1	0	0	0	1	0	0	1	转换		0	0	0
301	78	1	T1	0	0	1	1	0	0	0	0		0	0	0
302	64	1	T1	0	1	1	1	1	0	1	AI		0	0	0
303	39	0	T2	1	0	1	1	0	0	0	0		0	0	0
304	42	0	T1	1	0	1	0	0	0	1	TAM		0	0	0
305	54	1	T1	0	0	1	1	0	0	1	AI		0	0	0
306	50	0	T1	0	0	1	1	0	0	1	TAM		0	0	0
307	44	0	T2	0	0	1	1	0	0	1	TAM		0	0	0
308	34	0	T1	0	0	1	1	0	0	1	TAM		0	0	0
309	48	0	T1	1	1	1	0	0	0	1	TAM	endometrial thickening	0	0	0
310	49	0	T2	0	0	1	0	0	0	1	TAM		0	0	0
311	50	0	T2	0	0	1	0	0	0	0	0		0	0	0
312	47	0	T2	0	0	1	0	0	0	1	TAM		0	0	0
313	45	0	T2	1	0	1	0	0	0	0	0		0	0	0
314	35	0	T2	1	0	1	0	0	0	1	AI		1	1	local recurrence in December,2020
315	54	1	T2	0	0	1	1	0	0	1	TAM		0	0	0
316	43	0	T1	0	0	1	0	0	0	1	TAM		0	0	0
317	45	0	T2	0	0	1	1	0	0	1	TAM		0	0	0
318	39	0	T1	1	0	1	0	0	0	1	TAM		0	0	0
319	49	0	T2	0	1	1	1	0	0	1	TAM	osteoporosis；joint pain；fatty liver disease；endometrial thickening；Hyperlipidemia	0	0	0
320	52	1	T2	1	0	1	0	0	0	1	TAM	osteoporosis；joint pain；endometrial thickening，hysterectomy	0	0	0
321	49	0	T1	0	1	1	1	0	0	1	AI		0	0	0
322	46	0	T2	1	0	1	0	0	0	1	TAM		0	0	0
323	64	1	T1	0	0	1	1	0	0	1	TAM	endometrial thickening	0	0	0
324	60	1	T2	1	0	1	0	0	0	0	0		0	0	0
325	51	1	T2	0	0	1	1	0	0	1	TAM	dyslipidemia；endometrial thickening	0	0	0
326	37	0	T1	0	0	1	1	0	0	1	TAM	hypertension；Hyperlipidemia	1	1	local recurrence in December,2020
327	40	0	T2	0	0	1	0	0	0	1	TAM		0	0	0
328	49	0	T1	0	0	0	1	0	0	1	TAM		0	0	0
329	56	1	T1	0	0	0	1	0	0	0	0		0	0	0
330	48	0	T1	0	1	0	0	0	0	0	0		0	0	0
331	41	0	T2	0	1	0	0	0	0	1	TAM	endometrial thickening	0	0	0
332	62	1	T1	0	0	0	1	0	0	1	TAM	endometrial thickening	0	0	0
333	43	0	T1	0	1	0	1	0	0	0	0		0	0	0
334	63	1	T1	1	0	0	1	0	0	1	AI		0	0	0
335	47	0	T2	0	0	1	1	0	0	1	TAM	heart trouble, dryness of vaginal mucosa	0	0	0
336	37	0	T2	1	1	1	1	1	0	1	TAM		0	0	0
337	51	1	T1	0	0	1	1	0	0	1	TAM	joint pain；dyslipidemia	0	0	0
338	44	0	T1	1	0	1	0	0	1	1	TAM		0	0	0
339	48	0	T1	0	1	1	1	0	0	1	TAM	hyperhidrosis	0	0	0
340	57	1	T3	0	0	1	1	0	0	1	AI		0	0	0
341	46	0	T1	0	0	1	1	0	0	1	TAM	menopause	0	0	0
342	60	1	T2	1	1	1	0	0	0	1	AI		0	0	0
343	39	0	T1	1	1	1	1	0	0	1	TAM		0	0	0
344	70	1	T1	1	0	1	1	0	0	0	0		0	0	0
345	59	1	T1	0	0	1	0	0	0	1	AI		0	0	0
346	58	1	T2	0	1	1	0	0	0	1	TAM		0	0	0
347	75	1	T3	0	0	1	1	0	0	1	AI		0	0	0
348	46	0	T3	0	0	1	1	0	0	1	TAM		0	0	0
349	52	1	T2	0	1	1	1	0	0	0	0		0	0	0
350	62	1	T2	0	1	1	1	0	0	0	0		0	0	0
351	58	1	T2	0	0	1	0	0	0	0	0		0	0	0
352	41	0	T2	0	1	1	1	0	0	1	TAM		0	0	0
353	46	0	T1	0	0	1	1	0	0	1	TAM		0	0	0
354	48	0	T1	0	0	1	1	0	0	1	TAM		0	0	0
355	53	1	T1	0	0	1	1	1	0	1	TAM		0	0	0
356	61	1	T1	0	0	1	1	0	0	0	0		0	0	0
357	68	1	T2	0	0	1	1	0	0	1	TAM	joint pain	0	0	0
358	51	1	T1	0	1	1	1	0	0	1	TAM	endometrial thickening	0	0	0
359	56	1	T1	1	1	1	1	0	0	1	TAM		0	0	0
360	40	0	T2	0	0	1	1	0	0	1	TAM		0	0	0
361	53	1	T2	1	0	1	1	1	0	1	AI		0	0	0
362	53	1	T2	0	0	1	0	1	0	1	TAM		0	0	0
363	51	1	T1	1	0	1	1	0	0	0	0		0	0	0
364	42	0	T1	0	0	1	1	0	0	1	TAM	irregular menstrual, endometrial thickening；joint pain, hands and feer numbness	0	0	0
365	51	1	T2	0	0	1	1	0	0	1	TAM		1	1	contralateral DCIS in May, 2014
366	38	0	T1	0	1	1	1	0	0	1	TAM		0	0	0
367	76	1	T1	1	0	1	1	0	0	1	AI		0	0	0
368	60	1	T1	0	0	1	1	0	0	1	AI		0	0	0
369	44	0	T1	0	0	1	1	0	0	1	TAM	hands and feet numbness	0	0	0
370	43	0	T2	0	0	1	1	0	0	1	TAM	sense of hunger	0	0	0
371	56	1	T1	1	0	1	0	0	0	1	AI		0	0	0
372	57	1	T2	1	0	1	1	0	0	1	AI		0	0	0
373	47	0	T1	0	0	1	1	0	0	1	TAM		0	0	0
374	57	1	T1	0	0	1	0	0	0	1	AI		0	0	0
375	65	1	T2	1	0	1	1	0	0	1	AI		0	0	0
376	51	1	T2	0	0	1	1	1	0	0	0		0	0	0
377	56	1	T1	1	1	1	0	0	0	1	转换	hyperlipidemia	0	0	0
378	53	1	T2	0	1	0	1	0	0	0	0		0	0	0
379	44	0	T2	0	0	1	1	0	0	1	TAM	nausea，hot flashes	0	0	0
380	48	0	T1	0	0	1	1	0	0	1	TAM		0	0	0
381	55	1	T2	0	0	1	1	0	0	1	转换		0	0	0
382	43	0	T2	1	1	0	0	0	0	1	TAM		0	0	0
383	28	0	T3	0	0	1	1	0	0	1	TAM		0	0	0
384	75	1	T2	0	0	1	1	0	0	1	AI	diarrhea	0	0	0
385	73	1	T1	0	0	1	1	0	0	1	TAM	endometrial cancer	0	0	0
386	64	1	T1	0	0	1	1	0	0	1	AI	joint pain；insomnia	0	0	0
387	63	1	T2	0	0	1	0	0	0	1	AI		0	0	0
388	61	1	T2	1	0	1	1	0	0	0	0		0	0	0
389	44	0	T1	0	0	1	0	0	0	1	TAM		0	0	0
390	61	1	T1	0	0	1	1	0	0	0	0	uterine Leiomyoma；joint pain；	0	0	0
391	61	1	T2	0	1	1	1	0	0	1	AI	hyperhidrosis，insomnia，nausea，vomit，hot flashes	1	1	bone metastasis in September, 2014
392	42	0	T1	0	0	1	1	0	0	1	TAM		0	0	0
393	53	1	T2	0	0	1	1	0	0	0	0		0	0	0
394	66	1	T1	0	0	1	1	1	0	1	AI	nausea, dizziness, joint pain	1	1	contralateral DCIS in August, 2016
395	44	0	T1	0	0	1	0	1	0	1	TAM	hot flashes，hyperhidrosis	0	0	0
396	40	0	T3	0	0	1	0	0	0	1	TAM		0	0	0
397	72	1	T2	0	0	1	0	0	0	1	AI		0	0	0
398	60	1	T2	0	0	1	0	0	0	1	AI		0	0	0
399	66	1	T2	0	0	1	1	1	0	1	AI		0	0	0
400	61	1	T1	0	0	1	0	0	0	1	AI		0	0	0
401	50	0	T1	0	0	1	0	1	0	1	TAM	headache	0	0	0
402	56	1	T1	1	0	1	1	0	0	1	TAM		0	0	0
403	73	1	T2	1	0	1	1	1	0	1	TAM	endometrial thickening	0	0	0
404	47	0	T1	0	0	1	1	0	0	1	TAM		0	0	0
405	56	1	T2	0	0	1	0	0	0	1	TAM		0	0	0
406	49	0	T2	0	1	1	0	0	0	1	TAM		0	0	0
407	59	1	T1	0	1	1	1	1	0	0	0		0	0	0
408	53	1	T1	0	0	1	0	0	0	1	TAM		0	0	0
409	48	0	T1	0	0	1	1	0	0	1	TAM		0	0	0
410	47	0	T2	0	0	1	1	0	0	1	TAM		0	0	0
411	51	1	T1	0	0	1	0	0	0	0	0		0	0	0
412	76	1	T1	0	0	1	1	0	0	1	TAM		0	0	0
413	57	1	T2	0	0	1	1	0	0	1	AI		0	0	0
414	67	1	T1	1	0	1	0	0	0	1	TAM		0	0	0
415	48	0	T2	0	0	1	0	0	0	1	TAM		0	0	0
416	42	0	T2	0	0	1	1	0	0	0	0		0	0	0
417	44	0	T1	0	0	1	1	0	0	1	TAM		0	0	0
418	50	0	T1	0	0	1	1	0	0	1	TAM		0	0	0
419	38	0	T1	0	0	1	1	0	0	1	TAM	vomit	0	0	0
420	65	1	T1	1	0	1	1	0	0	1	AI		0	0	0
421	51	1	T2	0	1	1	0	0	0	1	TAM	endometrial thickening	0	0	0
422	70	1	T1	0	0	1	0	0	0	1	AI	bone pain、hands and feet numbness、stomachache	0	0	0
423	41	0	T1	0	0	1	0	0	0	0	0		0	0	0
424	66	1	T1	0	0	1	1	0	0	0	0	osteoporosis	0	0	0
425	38	0	T1	1	0	1	1	1	0	1	TAM		0	0	0
426	46	0	T1	0	0	1	0	0	0	1	TAM		0	0	0
427	44	0	T2	0	1	1	1	0	0	1	TAM		0	0	0
428	51	1	T1	0	0	1	1	0	0	1	TAM		0	0	0
429	50	0	T2	1	0	1	1	1	0	1	TAM		0	0	0
430	48	0	T1	0	1	1	1	0	0	1	TAM		0	0	0
431	50	0	T2	0	1	1	1	1	0	1	AI		0	0	0
432	43	0	T2	0	1	1	1	0	0	1	TAM		0	0	0
433	46	0	T2	1	0	1	0	0	0	1	TAM		0	0	0
434	50	0	T1	0	1	1	1	0	0	1	TAM	stomachache，eating disorder, depression	0	0	0
435	37	0	T1	0	0	1	1	0	0	0	0		0	0	0
436	50	0	T2	0	0	1	1	0	0	0	0		0	0	0
437	53	1	T3	0	0	0	0	1	0	1	TAM		0	0	0
438	46	0	T2	0	0	1	1	0	0	1	TAM	endometrial thickening	0	0	0
439	56	1	T2	1	0	1	1	0	0	1	TAM	thirst	0	0	0
440	63	1	T1	0	0	1	1	0	0	1	AI	joint pain，hyperlipidemia	0	0	0
441	53	1	T1	0	0	1	1	0	0	0	0	joint pain	0	0	0
442	51	1	T1	1	1	1	0	0	0	1	AI		0	0	0
443	33	0	T1	0	0	1	1	0	0	1	TAM		0	0	0
444	79	1	T1	0	0	1	1	0	0	1	TAM		0	0	0
445	55	1	T1	1	0	1	0	0	0	0	0		0	0	0
446	35	0	T1	0	0	1	1	0	0	0	0		0	0	0
447	37	0	T1	0	0	1	1	0	0	1	TAM	endometrial thickening	0	0	0
448	62	1	T1	0	0	1	1	1	0	0	0		0	0	0
449	51	1	T1	0	0	1	1	0	0	1	TAM		0	0	0
450	41	0	T1	0	0	1	1	0	0	0	0		0	0	0
451	42	0	T2	0	1	1	1	0	0	1	TAM		0	0	0
452	72	1	T1	0	0	1	1	0	0	1	AI		0	0	0
453	50	0	T1	0	1	1	1	0	0	0	0		0	0	0
454	42	0	T3	1	1	1	1	0	0	1	TAM		0	0	0
455	53	1	T2	0	1	1	0	0	0	1	TAM		0	0	0
456	38	0	T1	0	1	1	1	0	0	0	0		1	1	liver metastasis in May, 2016
457	46	0	T2	1	1	1	0	0	1	1	TAM	joint pain，hypocalcemia	0	0	0
458	72	1	T2	0	0	1	1	0	0	1	TAM	joint pain	0	0	0
459	72	1	T1	0	1	1	1	0	0	1	TAM		0	0	0
460	54	1	T2	0	1	1	1	0	0	1	TAM	joint pain，endometrial thickening	0	0	0
461	44	0	T2	0	1	1	1	0	0	0	0		0	0	0
462	73	1	T2	0	0	1	1	0	0	1	AI		0	0	0
463	41	0	T1	0	0	1	1	0	0	1	TAM		0	0	0
464	48	0	T2	0	0	1	0	0	0	0	0		0	0	0
465	50	0	T1	0	0	1	1	0	0	1	TAM		0	0	0
466	33	0	T1	0	0	1	1	0	0	0	0		0	0	0
467	47	0	T1	0	1	1	1	0	0	0	0	diabetes, joint pain；hot flashes；hyperhidrosis	0	0	0
468	43	0	T2	0	0	1	1	0	1	1	TAM	nausea, joint pain，hot flashes	0	0	0
469	80	1	T1	0	0	1	0	0	0	1	TAM		0	0	0
470	51	1	T2	1	0	1	0	0	0	0	0		0	0	0
471	44	0	T1	0	0	1	1	0	0	1	TAM	endometrial thickening	0	0	0
472	26	0	T2	0	0	1	1	0	0	0	0		0	0	0
473	44	0	T2	0	1	1	0	0	0	0	0		0	0	0
474	34	0	T2	0	0	1	0	0	0	1	TAM		0	0	0
475	50	0	T2	0	1	1	0	0	0	1	TAM		0	0	0
476	37	0	T2	0	0	1	1	0	0	1	TAM		0	0	0
477	42	0	T2	0	1	1	1	0	0	1	TAM	stomachache	0	0	0
478	46	0	T2	1	1	1	1	0	0	1	TAM		0	0	0
479	44	0	T1	0	0	1	1	0	0	1	TAM		0	0	0
480	50	0	T1	0	0	1	0	0	0	1	AI		0	0	0
481	65	1	T1	0	0	1	1	0	0	1	TAM	coronary heart disease	0	0	0
482	53	1	T1	0	1	1	1	0	0	1	TAM		0	0	0
483	62	1	T1	0	1	1	0	0	0	1	AI		0	0	0
484	58	1	T2	0	0	1	0	0	0	0	0		0	0	0
485	45	0	T2	0	1	1	1	0	0	1	TAM	endometrial thickening，joint pain	0	0	0
486	66	1	T1	0	0	1	1	0	0	0	0		0	0	0
487	45	0	T2	0	0	1	1	0	0	1	TAM	endometrial thickening	0	0	0
488	78	1	T1	0	0	1	1	0	0	1	AI	coronary heart disease	0	0	0
489	43	0	T2	1	1	1	0	0	0	0	0		0	0	0
490	60	1	T2	0	1	1	0	0	0	1	AI		0	0	0
491	53	1	T2	0	0	1	0	0	0	0	0		0	0	0
492	40	0	T1	0	0	1	0	0	0	1	TAM		0	0	0
493	35	0	T1	0	1	1	1	0	0	1	TAM	abnormal liver function	0	0	0
494	50	0	T2	0	0	1	1	0	0	1	TAM	endometrial cancer、bone pain	0	0	0
495	71	1	T1	0	0	1	1	0	0	1	AI		0	0	0
496	30	0	T1	0	1	1	0	0	0	1	TAM	endometrial thickening	0	0	0
497	56	1	T2	0	0	1	1	0	0	0	0		0	0	0
498	49	0	T2	0	1	1	1	0	0	1	TAM	endometrial thickening	0	0	0
499	43	0	T1	0	0	1	1	0	0	0	0		0	0	0
500	48	0	T2	1	1	1	1	0	0	1	TAM		0	0	0
501	46	0	T2	0	0	1	1	1	0	1	TAM	irregular menstrual	0	0	0
502	74	1	T2	0	0	1	0	0	0	1	AI		0	0	0
503	43	0	T2	0	1	1	1	0	0	1	TAM		0	0	0
504	46	0	T2	1	0	1	0	0	0	0	0		0	0	0
505	45	0	T1	0	0	1	1	0	0	1	TAM	weight gain	0	0	0
506	63	1	T2	0	0	1	0	0	0	0	0		0	0	0
507	43	0	T2	0	0	1	0	0	0	0	0		0	0	0
508	47	0	T1	0	0	1	1	0	0	0	0		0	0	0
509	43	0	T2	0	1	1	0	0	0	1	TAM		0	0	0
510	49	0	T1	0	0	1	1	0	0	0	0	Hyperlipidemia；uterine Leiomyoma	0	0	0
511	49	0	T2	0	0	1	1	0	0	1	TAM		0	0	0
512	49	0	T1	0	1	1	1	0	0	1	TAM		0	0	0
513	49	0	T1	0	0	1	1	0	0	0	0	joint pain	0	0	0
514	38	0	T2	0	1	1	0	0	0	1	TAM		0	0	0
515	58	1	T1	0	0	1	1	0	0	1	AI		0	0	0
516	67	1	T1	0	0	1	1	0	0	1	AI		0	0	0
517	34	0	T1	0	0	1	1	0	0	0	0		0	0	0
518	62	1	T1	0	0	1	1	0	0	1	AI	osteoporosis	0	0	0
519	58	1	T1	1	0	1	1	1	0	1	TAM		0	0	0
520	47	0	T1	1	0	1	1	1	0	0	0		0	0	0
521	71	1	T1	0	0	1	1	0	0	0	0	osteoporosis, body numbness, hot flashes	0	0	0
522	79	1	T1	1	0	1	1	0	0	1	TAM		0	0	0
523	41	0	T1	1	0	1	1	0	0	1	TAM		0	0	0
524	55	1	T2	0	0	1	1	0	0	1	TAM		0	0	0
525	51	1	T1	0	0	1	1	0	0	1	TAM		0	0	0
526	46	0	T2	0	0	1	1	0	0	0	0		0	0	0
527	51	1	T2	0	0	1	1	0	0	0	0		0	0	0
528	47	0	T2	1	0	1	0	0	0	1	TAM		0	0	0
529	52	1	T1	0	0	1	0	0	0	1	TAM		0	0	0
530	71	1	T2	0	0	1	1	0	0	0	0		0	0	0
531	40	0	T2	1	1	1	0	0	0	1	TAM		0	0	0
532	56	1	T1	0	0	1	1	0	0	0	0		0	0	0
533	47	0	T1	0	1	1	1	0	0	1	TAM	stomachache	0	0	0
534	48	0	T2	0	0	1	1	1	0	1	AI	joint pain	0	0	0
535	59	1	T2	0	0	1	1	0	0	0	0		0	0	0
536	52	1	T1	0	0	1	1	0	0	0	0		0	0	0
537	45	0	T1	0	0	1	0	0	0	0	0		0	0	0
538	77	1	T1	0	1	1	0	0	0	1	AI		0	0	0
539	65	1	T2	1	0	1	1	0	0	1	TAM		0	0	0
540	65	1	T1	0	1	1	1	0	0	1	TAM	endometrial thickening	0	0	0
541	62	1	T1	0	0	1	1	0	0	1	TAM	dyslipidemia；endometrial thickening	0	0	0
542	67	1	T1	0	0	1	0	0	0	0	0		0	0	0
543	41	0	T1	0	0	1	1	0	0	0	0		0	0	0
544	40	0	T2	0	0	1	1	0	0	0	0		0	0	0
545	62	1	T2	0	0	1	1	0	0	0	0		0	0	0
546	58	1	T2	0	1	1	1	0	0	1	TAM	discomfort of the whole body，hot flashes	0	0	0
547	37	0	T1	0	0	1	1	0	0	0	0		0	0	0
548	59	1	T1	0	1	1	1	0	0	0	0		0	0	0
549	68	1	T2	0	0	1	1	0	0	0	0		0	0	0
550	72	1	T2	0	0	1	1	0	0	0	0		0	0	0
551	62	1	T2	0	0	1	1	0	0	1	TAM		0	0	0
552	51	1	T1	0	0	1	0	0	0	1	AI		0	0	0
553	61	1	T2	0	0	1	1	0	0	0	0		0	0	0
554	38	0	T2	0	0	1	1	0	0	1	TAM	endometrial cancer	0	0	0
555	60	1	T1	0	0	1	0	0	0	0	0		0	0	0
556	27	0	T3	0	1	1	0	1	0	0	0		0	0	0
557	62	1	T2	0	0	1	0	0	0	1	AI	osteoporosis	0	0	0
558	47	0	T1	0	0	1	1	1	0	1	TAM	oint pain，hot flashes	0	0	0
559	55	1	T2	0	0	1	1	0	0	0	0		0	0	0
560	49	0	T1	0	0	1	1	0	0	1	TAM		0	0	0
561	45	0	T1	0	0	1	0	0	0	1	TAM	endometrial cancer	1	1	local recurrence in December, 2020
562	43	0	T1	0	1	1	1	0	0	0	0		0	0	0
563	37	0	T1	0	1	1	1	0	0	1	TAM	osteoporosis	0	0	0
564	64	1	T2	0	0	1	0	0	0	0	0		0	0	0
565	57	1	T2	0	1	1	0	0	0	1	AI		0	0	0
566	34	0	T2	0	1	1	1	0	0	1	TAM		0	0	0
567	44	0	T2	0	0	1	1	0	0	1	AI		0	0	0
568	37	0	T2	0	1	1	0	0	0	1	TAM		0	0	0
569	56	1	T2	0	1	1	0	0	0	0	0		0	0	0
570	56	1	T1	0	0	1	0	1	0	0	0		0	0	0
571	67	1	T1	0	1	1	1	1	0	1	AI		0	0	0
572	46	0	T1	0	1	1	1	0	0	1	AI	dyslipidemia	0	0	0
573	45	0	T1	1	0	1	1	0	0	1	TAM		0	0	0
574	51	1	T1	0	0	1	1	0	0	0	0		0	0	0
575	43	0	T1	0	1	1	0	0	0	1	TAM	hyperhidrosis	0	0	0
576	31	0	T2	0	1	1	1	1	0	1	TAM		0	0	0
577	42	0	T2	0	0	1	1	0	0	1	TAM	joint pain，coronary heart disease，dyslipidemia，hot flashes，increased vaginal discharge	0	0	0
578	50	0	T2	0	1	1	1	0	0	1	TAM	joint pain，dyslipidemia，coronary heart disease，hot flashes，increased vaginal discharge	0	0	0
579	59	1	T1	0	0	1	0	0	0	1	TAM		0	0	0
580	41	0	T3	0	0	1	0	0	0	1	TAM		0	0	0
581	48	0	T2	1	1	1	1	0	0	1	TAM		1	1	brain metastasis in August, 2018
582	44	0	T2	0	0	1	1	0	0	0	0		0	0	0
583	49	0	T1	0	0	1	1	0	0	0	0		0	0	0
584	41	0	T2	0	1	1	0	0	0	0	0		0	0	0
585	52	1	T1	0	1	1	0	0	0	0	0		0	0	0
586	60	1	T1	0	1	1	0	0	0	1	TAM	endometrial thickening	0	0	0
587	60	1	T1	0	0	1	0	0	0	0	0		0	0	0
588	54	1	T1	1	0	1	0	0	0	1	TAM		0	0	0
589	66	1	T2	1	0	1	0	0	0	0	0		0	0	0
590	54	1	T1	0	1	1	1	0	0	1	AI	osteoporosis	0	0	0
591	47	0	T2	1	0	1	1	0	1	1	TAM		0	0	0
592	46	0	T2	0	0	1	0	0	0	1	TAM		0	0	0
593	46	0	T2	1	1	1	1	0	0	1	TAM	hysterectomy	0	0	0
594	59	1	T1	0	0	1	1	0	0	1	AI	hypocalcemia	0	0	0
595	46	0	T2	0	0	1	1	0	0	1	TAM	joint pain	0	0	0
596	68	1	T1	0	0	1	1	0	0	0	0		0	0	0
597	59	1	T3	0	0	1	0	0	0	1	AI		0	0	0
598	44	0	T1	0	0	1	0	0	0	1	TAM		0	0	0
599	43	0	T1	0	0	1	1	0	0	1	TAM	hot flashes、hyperhidrosis	0	0	0
600	43	0	T1	0	0	1	1	0	0	0	0		0	0	0
601	49	0	T1	0	0	1	1	0	0	1	TAM	endometrial thickening	0	0	0
602	44	0	T1	0	0	1	1	1	0	1	TAM		0	0	0
603	51	1	T1	0	0	1	0	0	0	1	AI		0	0	0
604	63	1	T2	0	1	1	0	0	0	1	TAM		0	0	0
605	46	0	T2	0	0	1	1	1	0	1	TAM		0	0	0
606	55	1	T1	0	1	1	1	0	0	0	0		0	0	0
607	42	0	T1	0	0	1	1	0	0	0	0		0	0	0
608	80	1	T2	1	1	1	1	0	0	1	TAM		0	0	0
609	45	0	T2	0	0	1	1	0	0	0	0	axilla pain and swelling，osteoporosis	0	0	0
610	60	1	T2	0	0	1	0	0	0	1	AI		0	0	0
611	51	1	T1	0	0	1	1	0	0	0	0		0	0	0
612	48	0	T1	0	0	1	0	0	0	0	0		0	0	0
613	36	0	T1	0	0	1	0	0	0	1	TAM	irregular menstrual	0	0	0
614	54	1	T1	0	0	1	1	0	0	1	TAM	hot flashes	0	0	0
615	66	1	T2	0	0	1	1	0	0	0	0		0	0	0
616	61	1	T1	0	0	1	0	0	0	1	AI		0	0	0
617	74	1	T1	0	0	1	1	0	0	1	TAM		0	0	0
618	61	1	T1	0	1	1	0	0	0	1	TAM	osteoporosis，dyslipidemia，nausea，vomit	0	0	0
619	68	1	T2	1	1	1	1	1	0	1	TAM	hypertension，hyperlipidemia, osteoporosis；hot flashes；hyperhidrosis	0	0	0
620	49	0	T1	0	0	1	1	0	0	1	TAM	endometrial thickening	0	0	0
621	51	1	T1	0	0	1	1	0	0	1	TAM		0	0	0
622	48	0	T2	0	0	0	0	0	0	1	TAM	abnormal liver function	0	0	0
623	68	1	T1	0	0	1	1	0	0	1	TAM	endometrial thickening；endometritis	0	0	0
624	49	0	T1	0	0	1	1	0	0	1	TAM	osteoporosis，joint pain，heart disease，dyslipidemia，endometrial thickening	0	0	0
625	44	0	T1	0	0	1	1	0	0	1	TAM	hot flashes, fatigue	0	0	0
626	52	1	T1	0	1	1	1	0	0	0	0		0	0	0
627	52	1	T1	0	1	1	0	0	0	0	0		0	0	0
628	51	1	T1	0	0	1	1	0	0	0	0		0	0	0
629	61	1	T1	0	0	1	1	0	0	0	0		0	0	0
630	45	0	T1	0	0	1	1	0	0	1	TAM	poor memory，sleepiness	0	0	0
631	49	0	T2	0	0	1	0	0	0	1	AI		0	0	0
632	48	0	T2	0	1	1	0	0	0	1	TAM	osteoporosis	0	0	0
633	42	0	T1	0	1	1	0	0	0	0	0		0	0	0
634	45	0	T1	0	0	1	1	0	0	1	TAM	varicose veins, vaginal bleeding	0	0	0
635	49	0	T1	0	1	1	0	0	0	1	TAM	Hyperlipidemia, hyperlipidemia, joint pain	0	0	0
636	64	1	T1	0	0	1	0	0	0	1	AI	alopecia	0	0	0
637	45	0	T1	0	0	1	0	0	0	1	TAM	weight gain, alopecia	0	0	0
638	46	0	T1	1	1	1	0	0	0	0	0	hypocalcemia, hands and feet numbness, fatigue, hot flashes	0	0	0
639	57	1	T2	0	0	1	0	0	0	0	0		0	0	0
640	54	1	T1	0	0	1	1	0	0	1	TAM		0	0	0
641	45	0	T3	0	0	1	0	0	0	1	TAM	bladder discomfort，abnormal liver function，endometrial thickening，joint pain，stomachache	0	0	0
642	34	0	T2	0	1	1	1	0	0	1	TAM		1	1	abdominal cavity in December, 2017
643	41	0	T1	0	0	1	1	1	0	1	TAM	endometrial thickening	0	0	0
644	43	0	T1	0	0	1	1	0	0	1	TAM	endometrial thickening	0	0	0
645	43	0	T1	0	0	1	1	0	0	0	0		0	0	0
646	44	0	T1	0	0	1	1	0	0	1	TAM		0	0	0
647	43	0	T1	0	0	1	0	0	0	1	TAM	endometrial thickening	0	0	0
648	58	1	T3	0	0	1	0	0	0	1	AI	urinary disfunction，increased vaginal discharge	0	0	0
649	56	1	T2	1	1	1	1	0	0	1	AI	joint pain，osteoporosis	0	0	0
650	50	0	T1	1	0	1	0	0	0	1	AI		0	0	0
651	45	0	T1	0	1	1	1	0	0	1	TAM	endometrial thickening，ovarian cyst	0	0	0
652	38	0	T2	0	1	1	0	0	0	1	TAM	hypocalcemia，hot flashes，increased vaginal discharge，anemia	0	0	0
653	52	1	T1	0	0	1	0	0	0	1	TAM		0	0	0
654	46	0	T1	1	0	1	1	1	0	1	TAM	blurred vision	0	0	0
655	39	0	T3	0	1	0	0	0	0	0	0		0	0	0
656	43	0	T1	0	0	1	1	1	0	1	TAM		0	0	0
657	50	0	T2	0	1	1	0	0	1	1	TAM	endometrial thickening	0	0	0
658	48	0	T2	0	0	0	1	0	0	1	TAM		0	0	0
659	50	0	T2	0	0	1	1	0	0	0	0		0	0	0
660	64	1	T3	0	0	0	1	0	0	1	AI	joint pain；joint pain；dyslipidemia	0	0	0
661	57	1	T1	0	0	0	1	0	0	1	AI	alopecia	0	0	0
662	51	1	T2	1	1	0	0	0	0	1	TAM	diarrhea	0	0	0
663	61	1	T1	0	0	0	1	0	0	1	AI		0	0	0
664	31	0	T1	0	0	1	1	0	0	0	0		0	0	0
665	64	1	T2	0	0	1	1	1	0	1	AI		0	0	0
666	56	1	T1	0	1	1	0	0	0	0	0		1	1	abdominal cavity in July, 2020
667	43	0	T2	0	0	1	0	1	0	1	TAM		0	0	0
668	39	0	T2	0	0	1	0	0	0	1	TAM		0	0	0
669	48	0	T2	0	1	1	0	0	0	1	TAM	endometrial thickening	0	0	0
670	73	1	T1	0	1	1	0	0	0	1	AI	alopecia，hypertension	0	0	0
671	41	0	T3	1	0	1	1	0	0	0	0	ovarian cyst	0	0	0
672	55	1	T2	0	0	0	1	0	0	0	0		0	0	0
673	47	0	T1	1	0	1	0	0	0	1	TAM		0	0	0
674	59	1	T1	0	1	1	0	0	0	1	AI	osteoporosis，joint pain，dyslipidemia，abnormal liver function	0	0	0
675	49	0	T2	0	0	1	1	0	0	1	TAM		0	0	0
676	58	1	T1	0	0	1	0	1	0	1	AI		0	0	0
677	45	0	T2	0	0	1	1	0	0	1	TAM	endometrial thickening	0	0	0
678	43	0	T2	0	0	1	1	1	0	1	TAM	endometrial thickening	0	0	0
679	45	0	T2	0	1	1	1	0	0	1	TAM	endometrial thickening	0	0	0
680	39	0	T1	0	0	1	0	1	0	1	TAM		0	0	0
681	77	1	T1	0	0	1	0	1	0	1	AI	fracture	0	0	0
682	39	0	T1	0	0	1	0	0	1	1	TAM	endometrial thickening	0	0	0
683	47	0	T2	0	0	1	0	0	0	1	TAM	endometrial thickening	0	0	0
684	35	0	T1	0	1	1	0	0	0	1	TAM	endometrial thickening	0	0	0
685	42	0	T2	0	0	1	1	0	0	1	TAM	endometrial thickening	0	0	0
686	43	0	T1	0	0	1	1	0	0	1	TAM	endometrial thickening	0	0	0
687	70	1	T1	0	0	1	0	0	0	1	AI		0	0	0
688	38	0	T2	0	0	1	1	0	0	1	TAM	endometrial thickening	0	0	0
689	45	0	T1	0	1	1	0	0	0	1	TAM	endometrial thickening	0	0	0
690	61	1	T1	0	0	1	1	0	0	1	AI	osteoporosis	0	0	0
691	36	0	T1	0	0	0	1	0	0	1	TAM	abnormal liver function	0	0	0
692	44	0	T1	0	0	0	1	0	0	1	TAM	endometrial thickening	0	0	0
693	73	1	T2	0	0	1	1	0	0	1	AI	osteoporosis	0	0	0
694	42	0	T1	0	0	1	0	0	0	1	TAM	endometrial thickening	0	0	0
695	55	1	T1	0	0	1	0	0	0	1	TAM	osteoporosis，hypocalcemia	0	0	0
696	46	0	T2	0	1	1	0	1	0	1	TAM		0	0	0
697	41	0	T2	0	0	1	0	0	0	1	TAM	endometrial thickening	0	0	0
698	43	0	T1	0	0	1	1	0	0	1	TAM	endometrial thickening	0	0	0
699	52	1	T2	0	0	1	1	0	0	1	AI		0	0	0
700	59	1	T1	0	0	1	0	0	0	1	AI		0	0	0
701	44	0	T1	0	1	1	0	0	0	1	TAM	endometrial thickening	0	0	0
702	50	0	T2	0	1	1	0	0	0	1	TAM		0	0	0
703	47	0	T1	0	0	1	1	1	0	1	转换		0	0	0
704	49	0	T1	0	0	1	0	0	0	1	TAM	endometrial thickening	0	0	0
705	39	0	T1	0	0	1	0	0	0	1	TAM	sactosalpinx	0	0	0
706	65	1	T2	0	1	1	0	0	0	1	AI		0	0	0
707	29	0	T1	0	0	1	0	0	0	1	TAM	endometrial thickening	0	0	0
708	48	0	T1	0	0	1	0	0	0	1	TAM	endometrial thickening	0	0	0
709	50	0	T1	1	1	1	1	0	0	1	TAM		0	0	0
710	61	1	T2	1	0	1	1	0	0	1	AI	osteoporosis，joint pain	0	0	0
711	51	1	T2	0	0	0	0	0	0	1	AI		0	0	0
712	75	1	T1	0	0	1	1	0	0	0	0		0	0	0
713	36	0	T1	0	0	1	1	0	0	1	TAM	weight gain	0	0	0
714	56	1	T2	0	0	1	1	0	0	1	AI	osteoporosis，joint pain，hyperlipidemia	0	0	0
715	57	1	T1	0	0	1	1	0	0	1	AI		0	0	0
716	27	0	T1	0	0	1	1	0	0	1	TAM	abnormal liver function、Hyperlipidemia	0	0	0
717	66	1	T1	0	0	1	1	0	0	1	AI	coronary heart disease	0	0	0
718	61	1	T1	1	0	1	0	0	0	1	TAM		0	0	0
719	49	0	T3	1	1	1	0	1	0	1	TAM		0	0	0
720	43	0	T1	0	1	1	1	0	0	1	TAM		0	0	0
721	62	1	T1	0	1	1	1	0	0	0	0		0	0	0
722	60	1	T2	0	0	1	1	0	0	0	0	fatigue；joint pain；hyperhidrosis	0	0	0
723	49	0	T1	0	0	1	0	0	0	0	0		0	0	0
724	43	0	T2	1	1	1	1	0	0	1	转换		0	0	0
725	47	0	T1	1	1	1	1	0	0	1	TAM		0	0	0
726	60	1	T1	0	1	1	1	0	0	1	转换		0	0	0
727	39	0	T1	0	1	1	1	0	0	1	TAM	rash	0	0	0
728	49	0	T1	0	0	1	1	0	0	1	AI		0	0	0
729	46	0	T1	0	1	1	0	0	0	1	TAM	ovarian cyst	0	0	0
730	34	0	T2	0	1	1	0	0	0	1	TAM	endometrial thickening	0	0	0
731	51	1	T2	0	1	1	0	1	0	1	AI		0	0	0
732	60	1	T1	0	1	1	1	0	0	1	TAM	joint pain，increased vaginal discharge	0	0	0
733	48	0	T2	0	1	1	0	0	0	1	TAM		0	0	0
734	73	1	T2	0	0	0	0	1	0	1	AI	osteoporosis, hair growth	0	0	0
735	40	0	T1	0	0	1	1	0	0	0	0		0	0	0
736	50	0	T1	0	0	0	1	0	0	1	TAM		0	0	0
737	37	0	T1	0	0	1	1	0	0	1	TAM		0	0	0
738	64	1	T1	0	1	0	0	0	0	1	AI	joint pain，coronary heart disease，dyslipidemia	0	0	0
739	59	1	T2	0	1	0	1	0	0	0	0	endometrial thickening	1	1	liver metastasis in March, 2021
740	59	1	T1	0	1	1	1	0	0	1	TAM	hot flashes、endometrial thickening	0	0	0
741	52	1	T1	0	1	1	0	0	0	1	TAM	joint pain，osteoporosis	0	0	0
742	50	0	T1	0	0	0	0	0	0	1	AI		0	0	0
743	46	0	T2	0	0	1	1	1	0	0	0		0	0	0
744	39	0	T2	0	0	0	1	0	0	1	TAM	endometrial thickening, hot flashes, hyperhidrosis, nausea, vomit	0	0	0
745	45	0	T1	0	0	0	1	0	0	1	TAM		0	0	0
746	49	0	T1	0	0	1	1	1	0	1	switch	endometrial thickening，poor memory	0	0	0
747	50	0	T2	0	0	1	1	1	0	0	0		0	0	0
748	33	0	T1	0	0	0	1	0	0	1	TAM		0	0	0
749	55	1	T2	0	0	0	1	1	0	1	AI		0	0	0
750	61	1	T1	0	0	1	1	0	0	0	0	hypertension；uterine cyst；osteoporosis	0	0	0
751	42	0	T2	0	1	1	1	0	0	1	AI		0	0	0
752	41	0	T1	0	0	1	1	1	0	1	TAM	dysmenorrhea	0	0	0
753	49	0	T1	0	0	1	1	1	0	1	TAM		0	0	0
754	44	0	T2	0	1	1	0	0	0	1	TAM		0	0	0
755	49	0	T1	0	1	1	0	1	0	1	TAM	joint pain	0	0	0
756	33	0	T2	0	1	1	0	0	0	1	TAM		0	0	0
757	41	0	T1	0	0	1	1	0	0	0	0		0	0	0
758	51	1	T1	0	0	1	1	0	0	1	TAM	alopecia	0	0	0
759	32	0	T1	1	0	0	1	0	0	1	TAM	hyperhidrosis, palpitation, insomnia,diabetes	0	0	0
760	41	0	T1	0	0	1	1	0	0	1	TAM		0	0	0
761	58	1	T1	0	0	1	1	0	0	1	TAM	abnormal liver function，joint pain	0	0	0
762	52	1	T1	0	0	1	1	0	0	1	AI		0	0	0
763	57	1	T2	0	1	1	0	0	0	1	TAM		0	0	0
764	46	0	T3	0	1	1	0	0	0	0	0	joint pain	0	0	0
765	52	1	T1	0	0	1	0	0	0	1	TAM	discomfort of the whole body	0	0	0
766	37	0	T1	0	0	1	0	0	0	1	TAM		0	0	0
767	50	0	T2	0	0	0	1	0	0	1	TAM		0	0	0
768	42	0	T2	0	1	1	1	0	0	1	TAM		0	0	0
769	50	0	T1	0	0	0	1	0	0	1	TAM		0	0	0
770	44	0	T2	0	1	0	1	0	0	1	TAM		0	0	0
771	56	1	T2	1	1	0	0	0	0	1	TAM		1	1	local recurrence in May, 2017
772	50	0	T1	1	0	0	0	0	0	1	TAM	hyperlipidemia	0	0	0
773	52	1	T3	0	0	0	1	0	0	1	TAM		0	0	0
774	40	0	T2	0	1	1	1	0	0	1	TAM		0	0	0
775	51	1	T1	0	1	1	0	0	0	1	AI		0	0	0
776	42	0	T2	0	0	1	1	1	0	1	TAM	osteoporosis，hot flashes，endometrial thickening，increased vaginal discharge	0	0	0
777	69	1	T1	0	0	1	1	0	0	1	AI		0	0	0
778	50	0	T1	0	0	0	1	0	0	0	0		0	0	0
779	49	0	T1	0	0	1	1	0	0	1	TAM	joint pain	0	0	0
780	35	0	T1	0	1	1	0	0	0	1	TAM	fatigue；hypertension；Hyperlipidemia；joint pain；hyperhidrosis；hot flashes；hypocalcemia	0	0	0
781	54	1	T1	0	0	1	0	0	0	1	AI		0	0	0
782	49	0	T1	0	0	1	0	0	0	1	TAM		0	0	0
783	47	0	T1	0	0	1	0	0	0	1	AI		0	0	0
784	46	0	T1	0	1	1	1	0	0	1	TAM	increased vaginal discharge	0	0	0
785	50	0	T1	1	0	1	0	1	0	1	TAM		0	0	0
786	54	1	T3	0	1	1	0	0	0	0	0		0	0	0
787	50	0	T2	0	1	1	1	0	0	1	TAM	joint pain，dyslipidemia，endometrial thickening，insomnia，discomfort of the whole body，hot flashes	0	0	0
788	71	1	T1	1	0	1	1	0	0	1	AI	bone pain、osteoporosis	0	0	0
789	61	1	T1	0	1	1	0	0	0	1	AI		0	0	0
790	64	1	T1	0	1	1	0	0	0	1	AI	osteoporosis	0	0	0
791	50	0	T1	0	0	1	0	0	0	1	TAM	back itch	0	0	0
792	58	1	T1	0	0	1	1	0	0	1	TAM		0	0	0
793	40	0	T1	0	0	1	1	0	0	1	TAM		0	0	0
794	52	1	T1	0	0	1	0	0	0	1	TAM		0	0	0
795	56	1	T2	0	0	1	1	0	0	1	AI		0	0	0
796	47	0	T2	0	1	1	0	0	0	1	TAM	weight gain，Hyperlipidemia	0	0	0
797	62	1	T1	0	0	1	1	0	0	0	0		0	0	0
798	44	0	T2	0	0	1	1	0	0	1	TAM	joint pain	0	0	0
799	52	1	T1	0	0	1	0	0	0	1	AI	joint pain	0	0	0
800	52	1	T2	0	1	1	0	0	0	1	TAM	joint pain	0	0	0
801	60	1	T1	0	0	1	0	0	0	1	TAM		0	0	0
802	41	0	T2	0	0	1	1	0	0	1	TAM		0	0	0
803	45	0	T2	0	0	1	1	0	0	0	0	uterine Leiomyoma	0	0	0
804	55	1	T1	1	1	1	0	0	0	1	AI		0	0	0
805	53	1	T1	0	0	1	1	1	0	0	0		0	0	0
806	47	0	T1	0	0	1	0	0	0	1	TAM	osteoporosis，joint pain，endometrial thickening，endometrial polyp	0	0	0
807	38	0	T2	0	0	1	0	0	0	1	TAM	alopecia	0	0	0
808	35	0	T1	0	0	1	0	0	0	0	0		0	0	0
809	51	1	T2	0	1	1	1	0	0	1	AI		0	0	0
810	41	0	T1	0	1	1	0	0	0	1	TAM	blurred vision	0	0	0
811	63	1	T1	0	0	1	1	1	0	1	TAM		0	0	0
812	51	1	T2	0	0	1	0	0	0	1	TAM		0	0	0
813	51	1	T1	0	0	1	0	0	0	1	TAM		0	0	0
814	46	0	T2	0	0	1	0	0	0	1	TAM		0	0	0
815	73	1	T2	0	0	1	1	0	0	1	AI	joint pain，osteoporosis	0	0	0
816	57	1	T1	0	0	1	1	0	0	1	TAM		0	0	0
817	45	0	T1	0	0	1	0	0	0	1	TAM		0	0	0
818	53	1	T2	0	0	1	0	1	0	1	AI	hot flashes, osteoporosis	0	0	0
819	69	1	T1	0	0	1	1	0	0	1	AI	endometrial thickening	0	0	0
820	77	1	T1	0	0	1	0	0	0	1	AI		0	0	0
821	39	0	T1	0	0	1	0	0	0	1	TAM		0	0	0
822	41	0	T2	0	0	1	1	0	0	1	TAM	endometrial thickening	0	0	0
823	48	0	T1	0	0	1	1	0	0	1	TAM	joint pain	0	0	0
824	47	0	T1	0	0	1	1	0	0	1	TAM		0	0	0
825	49	0	T2	0	0	1	1	0	0	1	TAM		0	0	0
826	81	1	T2	0	0	1	1	0	0	1	TAM		0	0	0
827	60	1	T2	0	0	1	0	0	0	1	TAM		0	0	0
828	72	1	T2	0	1	1	0	0	0	1	AI		0	0	0
829	59	1	T1	0	0	1	0	0	0	1	AI		0	0	0
830	51	1	T1	0	1	1	1	0	0	0	0	headache, hyperhidrosis	0	0	0
831	37	0	T3	0	0	1	0	0	0	1	TAM		0	0	0
832	55	1	T2	0	1	1	0	0	0	1	AI		0	0	0
833	56	1	T2	0	1	1	0	0	0	0	0	hypocalcemia；joint pain	0	0	0
834	47	0	T1	0	0	1	1	0	0	0	0	endometrial thickening	0	0	0
835	58	1	T2	0	1	1	0	0	0	1	AI	osteoporosis，joint pain；endometrial thickening	0	0	0
836	36	0	T2	0	0	1	0	0	0	1	TAM		0	0	0
837	47	0	T2	0	0	1	1	0	0	1	TAM	endometrial thickening，hysterectomy	0	0	0
838	60	1	T1	0	0	1	0	0	0	1	AI	osteoporosis	0	0	0
839	46	0	T1	0	0	1	1	0	0	1	TAM	endometrial thickening	0	0	0
840	64	1	T1	0	1	1	1	0	0	1	AI		0	0	0
841	51	1	T2	0	0	1	1	0	0	1	TAM	hot flashes	0	0	0
842	45	0	T2	0	0	1	1	0	0	1	TAM		0	0	0
843	46	0	T2	0	0	1	0	1	1	1	TAM	hot flashes；increased vaginal discharge	0	0	0
844	59	1	T2	0	1	1	0	0	0	1	AI	hyperhidrosis	0	0	0
845	58	1	T2	0	0	0	1	0	0	1	AI		0	0	0
846	34	0	T2	0	0	1	1	0	0	1	TAM	endometrial thickening	0	0	0
847	45	0	T2	0	0	0	1	0	0	1	TAM		0	0	0
848	45	0	T2	0	0	1	0	0	0	1	TAM	osteoporosis	0	0	0
849	60	1	T1	0	0	1	1	0	0	0	0		0	0	0
850	45	0	T1	0	0	1	0	1	0	1	TAM	insomnia, fatigue, irritability	0	0	0
851	50	0	T1	0	0	0	1	0	0	1	TAM	uterine Leiomyoma	0	0	0
852	42	0	T2	0	0	1	1	0	0	1	TAM	hyperhidrosis、insomnia；uterine Leiomyoma	0	0	0
853	50	0	T1	0	0	0	0	0	0	1	TAM	alopecia	0	0	0
854	44	0	T2	0	0	0	1	0	0	1	TAM		0	0	0
855	53	1	T2	0	0	1	0	0	0	1	TAM	osteoporosis	0	0	0
856	64	1	T1	0	0	0	1	0	0	1	AI	increased vaginal discharge	0	0	0
857	66	1	T2	0	0	0	0	0	0	1	AI		0	0	0
858	50	0	T1	1	0	1	1	0	0	1	TAM		0	0	0
859	52	1	T2	1	1	1	0	0	0	1	TAM		0	0	0
860	50	0	T1	0	0	0	1	0	0	0	0		0	0	0
861	49	0	T3	1	0	1	0	1	0	1	TAM		1	1	liver metastasis in December, 2017
862	48	0	T2	0	0	1	1	1	0	0	0		0	0	0
863	52	1	T2	0	1	1	0	0	0	1	TAM	endometrial thickening	0	0	0
864	45	0	T2	0	0	1	0	0	0	0	0		0	0	0
865	39	0	T1	0	0	1	0	0	0	1	转换		0	0	0
866	61	1	T1	0	0	0	0	0	0	1	AI		0	0	0
867	43	0	T1	0	0	0	0	0	0	1	TAM		0	0	0
868	43	0	T1	0	1	1	0	0	0	0	0		0	0	0
869	59	1	T1	0	0	1	1	0	0	1	AI	osteoporosis	0	0	0
870	53	1	T2	0	0	1	0	0	0	1	AI	osteoporosis，joint pain	0	0	0
871	46	0	T1	0	0	1	0	0	0	1	TAM		0	0	0
872	48	0	T2	0	1	1	0	0	0	0	0		0	0	0
873	49	0	T1	0	0	1	1	0	0	1	TAM		0	0	0
874	44	0	T1	0	1	1	0	0	0	1	TAM		0	0	0
875	41	0	T1	0	0	1	0	0	0	1	AI		0	0	0
876	60	1	T2	0	1	1	1	0	0	0	0		0	0	0
877	55	1	T1	0	0	1	1	0	0	1	AI	osteoporosis,fracture	0	0	0
878	46	0	T1	0	0	1	1	1	0	1	TAM		0	0	0
879	43	0	T2	0	0	0	1	0	0	1	TAM	stomachache	0	0	0
880	57	1	T3	0	1	1	0	0	0	1	TAM		0	0	0
881	39	0	T2	0	0	1	0	0	0	1	TAM		0	0	0
882	59	1	T2	0	0	1	1	0	0	1	AI		0	0	0
883	55	1	T2	0	0	1	1	0	0	1	TAM		0	0	0
884	42	0	T2	0	1	1	1	0	0	1	TAM		0	0	0
885	43	0	T1	0	0	0	1	0	0	1	TAM	endometrial thickening, joint pain, anemia	1	1	contralateral DCIS in April, 2019
886	56	1	T1	0	0	1	0	0	0	1	AI	osteoporosis, fracture	0	0	0
887	54	1	T1	0	0	1	0	0	0	1	AI		0	0	0
888	43	0	T1	0	0	1	1	0	0	1	TAM		0	0	0
889	61	1	T1	0	0	1	0	0	0	0	0		0	0	0
890	69	1	T1	0	0	1	1	0	0	1	AI		0	0	0
891	61	1	T2	0	0	1	0	0	0	1	AI		0	0	0
892	37	0	T1	1	1	1	0	0	0	1	TAM	irregular menstrual	0	0	0
893	50	0	T1	0	0	1	1	0	0	1	TAM	joint pain；hypocalcemia	0	0	0
894	46	0	T1	0	0	0	1	0	0	1	TAM		0	0	0
895	43	0	T3	0	0	1	0	0	0	1	TAM	leg pain	0	0	0
896	64	1	T1	0	0	1	0	0	0	0	0		0	0	0
897	59	1	T2	0	0	1	0	0	0	1	TAM		0	0	0
898	56	1	T2	0	0	1	0	0	0	0	0	hot flashes；hyperhidrosis；fatigue	0	0	0
899	64	1	T2	0	1	1	0	0	1	1	AI		0	0	0
900	36	0	T1	1	1	1	0	0	0	1	TAM		0	0	0
901	46	0	T2	0	1	1	0	0	0	1	TAM	cervical polyp	0	0	0
902	43	0	T1	0	0	1	0	0	0	1	TAM		0	0	0
903	58	1	T2	0	0	1	1	0	0	1	TAM		0	0	0
904	37	0	T2	0	0	1	0	0	0	1	TAM		0	0	0
905	59	1	T2	0	1	1	1	0	0	0	0		0	0	0
906	46	0	T1	0	0	1	1	0	0	0	0		0	0	0
907	61	1	T1	0	0	1	1	0	0	1	AI		0	0	0
908	39	0	T2	0	0	1	0	0	0	1	TAM	abnormal liver function	0	0	0
909	58	1	T2	0	0	0	1	0	1	1	TAM		0	0	0
910	31	0	T2	0	0	1	1	1	0	1	TAM		0	0	0
911	40	0	T2	0	0	1	0	0	0	1	TAM	endometrial thickening	0	0	0
912	66	1	T1	0	0	1	1	0	0	1	AI		0	0	0
913	43	0	T1	0	1	1	0	0	0	1	TAM		0	0	0
914	28	0	T3	0	0	1	1	0	0	1	TAM		0	0	0
915	46	0	T1	0	0	1	1	0	0	1	TAM		0	0	0
916	52	1	T1	0	1	1	1	0	0	1	AI	joint pain；osteoporosis	0	0	0
917	62	1	T1	0	0	1	0	0	0	1	AI		0	0	0
918	61	1	T1	0	1	1	1	0	0	1	AI	osteoporosis, sleepiness	0	0	0
919	55	1	T1	1	0	0	0	0	0	1	AI	osteoporosis	0	0	0
920	55	1	T2	0	1	1	0	0	0	1	AI	hot flashes	0	0	0
921	51	1	T1	0	0	1	1	0	0	1	TAM		0	0	0
922	47	0	T1	0	0	1	1	0	0	1	TAM		0	0	0
923	69	1	T1	0	0	1	1	0	0	1	AI		0	0	0
924	44	0	T1	0	0	0	0	0	0	1	转换		0	0	0
925	62	1	T1	0	0	0	1	0	0	0	0	osteoporosis	0	0	0
926	38	0	T1	0	1	1	1	0	0	1	TAM	endometrial thickening	0	0	0
927	61	1	T1	0	0	1	1	0	0	1	AI	bone pain, abnormal liver function, edema, discomfort of the whole body	0	0	0
928	40	0	T1	0	0	1	0	0	0	1	TAM		0	0	0
929	77	1	T2	0	0	1	1	0	0	0	0		0	0	0
930	51	1	T2	1	0	1	0	0	0	0	0		0	0	0
931	67	1	T2	1	1	1	1	0	0	1	AI	nausea；hot flashes	0	0	0
932	52	1	T1	0	1	1	1	0	0	0	0		0	0	0
933	53	1	T1	0	1	1	0	1	0	1	TAM		0	0	0
934	46	0	T1	0	0	1	0	0	0	1	TAM		0	0	0
935	58	1	T1	0	1	1	0	0	0	1	TAM		0	0	0
936	55	1	T2	0	1	1	1	0	0	1	TAM		0	0	0
937	48	0	T1	0	1	1	0	0	0	1	TAM		0	0	0
938	31	0	T1	0	0	1	1	0	0	1	TAM	endometrial thickening	0	0	0
939	55	1	T2	0	1	1	0	0	0	1	TAM		0	0	0
940	44	0	T1	0	1	1	0	0	0	0	0		0	0	0
941	47	0	T1	0	1	1	0	0	0	0	0		0	0	0
942	80	1	T2	0	1	1	1	0	0	1	TAM	Hyperlipidemia	0	0	0
943	53	1	T2	0	0	1	1	0	0	1	TAM		0	0	0
944	47	0	T2	0	0	1	1	1	0	1	TAM		0	0	0
945	41	0	T1	0	0	1	1	0	0	0	0		0	0	0
946	36	0	T1	0	0	1	1	0	0	0	0		0	0	0
947	48	0	T2	0	1	1	0	0	0	1	TAM	endometrial thickening	0	0	0
948	44	0	T2	0	0	1	0	0	0	1	TAM	urinary disfunction, increased vaginal discharge	0	0	0
949	71	1	T2	0	0	1	0	1	0	1	AI		0	0	0
950	69	1	T2	1	0	1	0	0	0	1	TAM		0	0	0
951	49	0	T1	0	0	1	1	0	0	1	TAM	endometrial thickening	0	0	0
952	50	0	T1	0	0	1	1	0	0	1	TAM		0	0	0
953	55	1	T1	0	0	1	1	0	0	1	TAM	endometrial thickening	0	0	0
954	68	1	T3	0	0	1	0	0	0	1	AI		0	0	0
955	57	1	T2	1	0	1	0	0	0	1	TAM		0	0	0
956	55	1	T1	0	1	0	0	0	0	0	0	fatigue；hot flashes	0	0	0
957	44	0	T1	0	1	1	0	0	0	1	TAM		0	0	0
958	45	0	T1	0	1	1	0	0	0	1	TAM		0	0	0
959	65	1	T1	0	0	1	1	0	0	1	AI	osteoporosis	0	0	0
960	57	1	T1	0	0	1	1	0	0	1	AI	bone pain；alopecia	0	0	0
961	48	0	T1	0	0	1	1	0	0	1	AI	osteoporosis	0	0	0
962	40	0	T1	0	0	1	1	0	0	1	TAM	menopause	0	0	0
963	40	0	T1	0	0	1	1	0	0	0	0		0	0	0
964	52	1	T1	0	0	1	0	0	0	1	AI	joint pain	0	0	0
965	44	0	T3	0	1	1	0	0	0	1	TAM	discomfort in the whole body；hot flashes	0	0	0
966	38	0	T1	0	0	1	0	0	0	1	TAM		0	0	0
967	43	0	T2	0	0	1	1	0	0	1	TAM	endometrial thickening	0	0	0
968	49	0	T2	0	0	1	0	0	0	0	0		0	0	0
969	46	0	T3	0	0	1	0	0	0	1	TAM		0	0	0
970	64	1	T1	0	0	1	1	0	0	1	AI	osteoporosis	0	0	0
971	44	0	T1	0	0	1	1	0	0	1	TAM		0	0	0
972	46	0	T2	0	0	1	1	0	0	1	TAM		0	0	0
973	45	0	T2	0	1	1	1	0	0	1	TAM		0	0	0
974	54	1	T2	1	1	1	0	0	0	1	TAM		0	0	0
975	43	0	T2	0	0	1	1	0	0	0	0		0	0	0
976	47	0	T1	0	0	1	0	0	0	0	0		0	0	0
977	43	0	T2	0	0	1	0	0	0	0	0		0	0	0
978	55	1	T1	1	0	1	1	0	0	1	AI	bone pain, joint pain, discomfort of the whole body	0	0	0
979	49	0	T1	1	0	1	0	0	0	1	TAM		0	0	0
980	64	1	T1	0	0	1	1	0	0	0	0	endometrial thickening，osteoporosis，whole body pain	0	0	0
981	54	1	T1	0	0	1	1	0	0	1	AI	bone pain	0	0	0
982	44	0	T1	0	0	1	0	0	0	1	TAM	abnormal liver function；endometrial thickening	0	0	0
983	53	1	T3	0	0	1	1	0	0	0	0	joint pain；hypocalcemia	0	0	0
984	40	0	T2	0	0	1	1	0	0	1	TAM		0	0	0
985	46	0	T2	0	1	0	0	0	0	1	TAM	osteoporosis，joint pain；hot flashes；endometrial thickening；increased vaginal discharge	0	0	0
986	48	0	T1	0	0	1	0	0	0	1	转换		0	0	0
987	43	0	T1	0	0	1	1	0	0	1	TAM	insomnia	0	0	0
988	47	0	T1	0	0	0	0	0	0	1	TAM	rash	0	0	0
989	57	1	T1	1	0	1	0	0	0	1	AI		0	0	0
990	48	0	T3	0	0	1	1	0	0	1	TAM	endometrial thickening，joint pain	0	0	0
991	52	1	T2	0	1	1	0	0	0	0	0	hypertension；joint pain；uterine Leiomyoma；hysterectomy；hyperhidrosis	0	0	0
992	36	0	T2	0	1	1	0	0	0	1	转换		0	0	0
993	40	0	T2	0	1	1	1	0	0	1	TAM		0	0	0
994	52	1	T1	0	0	1	1	0	0	1	TAM		0	0	0
995	56	1	T1	0	0	1	0	0	0	1	TAM	fatigue；endometrial thickening	0	0	0
996	45	0	T2	0	0	1	1	0	0	0	0		0	0	0
997	42	0	T2	0	1	1	0	0	0	1	TAM	endometrial thickening，hysterectomy	0	0	0
998	48	0	T2	0	0	1	0	0	1	1	TAM		0	0	0
999	69	1	T1	0	0	1	1	0	0	1	AI		0	0	0
1000	48	0	T1	1	0	1	1	0	0	1	TAM		0	0	0
1001	42	0	T2	0	0	1	0	0	0	1	TAM		0	0	0
1002	47	0	T2	0	1	0	1	1	0	1	TAM	increased vaginal discharge	0	0	0
1003	53	1	T3	0	1	0	0	0	0	1	AI	insomnia	0	0	0
1004	52	1	T2	0	1	1	1	0	0	1	TAM		0	0	0
1005	41	0	T2	0	0	1	0	0	0	1	TAM		0	0	0
1006	41	0	T1	0	1	1	0	0	0	0	0		0	0	0
1007	66	1	T1	0	1	0	1	0	0	1	AI		0	0	0
