# Supplementary material for: Efficacy and safety of endocrine therapy after mastectomy in patients with hormone receptor positive breast ductal carcinoma in situ: Retrospective cohort study
Source: eLife. 2023 Feb 6;12:e83045. doi: 10.7554/eLife.83045 (PMC9901931; doi:10.7554/eLife.83045)
Supplement: Table 4—source data 1. [file elife-83045-table4-data1.xlsx]

## Sheet: Sheet1
No.	ET	Drug type	Adverse events
1	1	TAM	endometrial thickening
6	1	TAM	joint pain；increased vaginal discharge
7	1	TAM
9	1	AI	osteoporosis,ulna fracture in 2018
10	1	AI	elevated hepatic transaminases
11	1	AI	osteoporosis
14	1	TAM	endometrial thickening
16	1	AI
17	1	TAM	joint pain
19	1	AI
22	1	TAM	joint pain
24	1	TAM
25	1	TAM
28	1	AI	joint pain；osteoporosis；hypertension；Hyperlipidemia
29	1	TAM
30	1	AI	coronary heart disease
31	1	TAM
32	1	AI
35	1	TAM	joint pain
37	1	TAM
39	1	TAM
40	1	TAM	joint pain；endometrial thickening
41	1	转换
42	1	TAM
43	1	AI
44	1	AI	hypertension
45	1	AI	osteoporosis
46	1	TAM
47	1	TAM
48	1	AI	stomachache
49	1	TAM
50	1	AI
51	1	AI	acid reflux
52	1	AI
53	1	TAM
54	1	AI
55	1	AI	joint pain
56	1	AI
57	1	AI	abnormal liver function
58	1	AI	hot flashes，endometrial thickening
59	1	AI
61	1	转换	endometrial thickening
62	1	TAM
64	1	TAM	joint pain
66	1	AI
67	1	AI
68	1	AI
69	1	TAM	discomfort of the whole body
70	1	TAM	hypertension；Hyperlipidemia
71	1	TAM
72	1	TAM
73	1	AI
74	1	TAM
76	1	TAM
77	1	TAM
78	1	TAM
80	1	AI
81	1	TAM	nausea
82	1	AI
83	1	TAM
84	1	TAM
85	1	AI	flatulence
86	1	AI
87	1	AI
88	1	TAM	uterine Leiomyoma，hysterectomy
90	1	AI	osteoporosis
91	1	TAM
92	1	AI	stomachache
93	1	TAM
94	1	AI
95	1	TAM
96	1	TAM
97	1	AI
100	1	AI
103	1	TAM
104	1	AI
105	1	TAM
106	1	AI	osteoporosis
108	1	TAM
109	1	AI
110	1	AI
111	1	AI
112	1	TAM	osteoporosis；joint pain
113	1	TAM
114	1	TAM
115	1	TAM
116	1	TAM
118	1	AI
119	1	AI	osteoporosis；bone pain
120	1	TAM
121	1	TAM
122	1	AI
123	1	转换	osteoporosis
124	1	TAM
125	1	TAM	coronary heart disease；dyslipidemia；hot flashes
127	1	TAM
128	1	TAM
129	1	AI	osteoporosis
130	1	TAM
131	1	TAM
132	1	TAM
133	1	TAM
134	1	TAM
135	1	AI
136	1	AI
137	1	AI
138	1	TAM	osteoporosis；hyperlipidemia
139	1	TAM
141	1	转换	osteoporosis
142	1	TAM	endometrial thickening
143	1	AI
144	1	TAM
146	1	AI
147	1	TAM	joint pain
148	1	AI
149	1	TAM
150	1	TAM
151	1	TAM
152	1	TAM	joint pain
153	1	TAM
154	1	AI
155	1	TAM
156	1	TAM	joint swelling, dyspepsia, hot flashes
157	1	TAM
158	1	TAM
159	1	AI
161	1	TAM
162	1	TAM
163	1	AI
164	1	TAM
165	1	转换
167	1	AI
168	1	TAM
169	1	TAM
170	1	TAM
171	1	TAM
172	1	TAM
177	1	TAM
179	1	TAM
180	1	TAM	flatulence
181	1	TAM
182	1	TAM
183	1	TAM
184	1	TAM
185	1	TAM
187	1	TAM
188	1	TAM
189	1	TAM
190	1	AI	joint pain
191	1	TAM
193	1	TAM	abnormal liver function；vaginitis
194	1	AI
195	1	TAM
196	1	TAM	endometrial thickening
197	1	TAM
198	1	TAM	Hyperlipidemia
199	1	TAM	breast adenoma
201	1	AI
202	1	AI
203	1	AI
204	1	TAM
205	1	TAM	vaginitis, irregular menstrual
206	1	TAM
207	1	AI
208	1	转换
209	1	TAM	discomfort in the whole body, hot flashes
210	1	TAM
211	1	TAM	endometrial thickening；hyperhidrosis；hot flashes；joint pain；hypocalcemia
212	1	TAM
213	1	TAM	breast pain and swelling
214	1	AI
216	1	AI
217	1	TAM
219	1	AI
220	1	AI
221	1	AI	joint pain
222	1	TAM	endometrial thickening
223	1	AI
224	1	TAM
225	1	TAM	joint pain
226	1	TAM	alopecia；joint pain；endometrial thickening；hot flashes
227	1	TAM
228	1	TAM
229	1	TAM
231	1	TAM
232	1	TAM
234	1	AI
235	1	TAM	edema, weight gain
236	1	TAM
237	1	AI
238	1	TAM	brain infarction, hyperlipidemia
239	1	TAM
241	1	TAM
242	1	TAM
243	1	TAM
244	1	TAM	blurred vision
245	1	TAM
247	1	AI
248	1	TAM
249	1	TAM
250	1	TAM
251	1	TAM	diabetes, joint pain
254	1	TAM	joint pain；endometrial thickening
255	1	AI
256	1	TAM
257	1	AI
258	1	TAM
259	1	TAM
260	1	TAM
261	1	TAM
262	1	TAM
263	1	TAM
264	1	AI
265	1	TAM
266	1	TAM	osteoporosis
267	1	TAM
268	1	TAM	Hyperlipidemia, abdominal pain, endometrial thickening
269	1	TAM
270	1	TAM
271	1	TAM
272	1	TAM
273	1	AI
275	1	TAM	osteoporosis；joint pain
276	1	TAM
278	1	TAM
279	1	TAM
280	1	TAM
281	1	AI
282	1	TAM
284	1	AI
286	1	TAM
288	1	TAM
290	1	TAM
292	1	TAM
293	1	TAM
294	1	AI
295	1	TAM
296	1	TAM	fatty liver disease；abnormal liver function；Hyperlipidemia；hot flashes
297	1	TAM
298	1	TAM
299	1	TAM
300	1	转换
302	1	AI
304	1	TAM
305	1	AI
306	1	TAM
307	1	TAM
308	1	TAM
309	1	TAM	endometrial thickening
310	1	TAM
312	1	TAM
314	1	AI
315	1	TAM
316	1	TAM
317	1	TAM
318	1	TAM
319	1	TAM	osteoporosis；joint pain；fatty liver disease；endometrial thickening；Hyperlipidemia
320	1	TAM	osteoporosis；joint pain；endometrial thickening，hysterectomy
321	1	AI
322	1	TAM
323	1	TAM	endometrial thickening
325	1	TAM	dyslipidemia；endometrial thickening
326	1	TAM	hypertension；Hyperlipidemia
327	1	TAM
328	1	TAM
331	1	TAM	endometrial thickening
332	1	TAM	endometrial thickening
334	1	AI
335	1	TAM	heart trouble, dryness of vaginal mucosa
336	1	TAM
337	1	TAM	joint pain；dyslipidemia
338	1	TAM
339	1	TAM	hyperhidrosis
340	1	AI
341	1	TAM	menopause
342	1	AI
343	1	TAM
345	1	AI
346	1	TAM
347	1	AI
348	1	TAM
352	1	TAM
353	1	TAM
354	1	TAM
355	1	TAM
357	1	TAM	joint pain
358	1	TAM	endometrial thickening
359	1	TAM
360	1	TAM
361	1	AI
362	1	TAM
364	1	TAM	irregular menstrual, endometrial thickening；joint pain, hands and feer numbness
365	1	TAM
366	1	TAM
367	1	AI
368	1	AI
369	1	TAM	hands and feet numbness
370	1	TAM	sense of hunger
371	1	AI
372	1	AI
373	1	TAM
374	1	AI
375	1	AI
377	1	转换	hyperlipidemia
379	1	TAM	nausea，hot flashes
380	1	TAM
381	1	转换
382	1	TAM
383	1	TAM
384	1	AI	diarrhea
385	1	TAM	endometrial cancer
386	1	AI	joint pain；insomnia
387	1	AI
389	1	TAM
391	1	AI	hyperhidrosis，insomnia，nausea，vomit，hot flashes
392	1	TAM
394	1	AI	nausea, dizziness, joint pain
395	1	TAM	hot flashes，hyperhidrosis
396	1	TAM
397	1	AI
398	1	AI
399	1	AI
400	1	AI
401	1	TAM	headache
402	1	TAM
403	1	TAM	endometrial thickening
404	1	TAM
405	1	TAM
406	1	TAM
408	1	TAM
409	1	TAM
410	1	TAM
412	1	TAM
413	1	AI
414	1	TAM
415	1	TAM
417	1	TAM
418	1	TAM
419	1	TAM	vomit
420	1	AI
421	1	TAM	endometrial thickening
422	1	AI	bone pain、hands and feet numbness、stomachache
425	1	TAM
426	1	TAM
427	1	TAM
428	1	TAM
429	1	TAM
430	1	TAM
431	1	AI
432	1	TAM
433	1	TAM
434	1	TAM	stomachache，eating disorder, depression
437	1	TAM
438	1	TAM	endometrial thickening
439	1	TAM	thirst
440	1	AI	joint pain，hyperlipidemia
442	1	AI
443	1	TAM
444	1	TAM
447	1	TAM	endometrial thickening
449	1	TAM
451	1	TAM
452	1	AI
454	1	TAM
455	1	TAM
457	1	TAM	joint pain，hypocalcemia
458	1	TAM	joint pain
459	1	TAM
460	1	TAM	joint pain，endometrial thickening
462	1	AI
463	1	TAM
465	1	TAM
468	1	TAM	nausea, joint pain，hot flashes
469	1	TAM
471	1	TAM	endometrial thickening
474	1	TAM
475	1	TAM
476	1	TAM
477	1	TAM	stomachache
478	1	TAM
479	1	TAM
480	1	AI
481	1	TAM	coronary heart disease
482	1	TAM
483	1	AI
485	1	TAM	endometrial thickening，joint pain
487	1	TAM	endometrial thickening
488	1	AI	coronary heart disease
490	1	AI
492	1	TAM
493	1	TAM	abnormal liver function
494	1	TAM	endometrial cancer、bone pain
495	1	AI
496	1	TAM	endometrial thickening
498	1	TAM	endometrial thickening
500	1	TAM
501	1	TAM	irregular menstrual
502	1	AI
503	1	TAM
505	1	TAM	weight gain
509	1	TAM
511	1	TAM
512	1	TAM
514	1	TAM
515	1	AI
516	1	AI
518	1	AI	osteoporosis
519	1	TAM
522	1	TAM
523	1	TAM
524	1	TAM
525	1	TAM
528	1	TAM
529	1	TAM
531	1	TAM
533	1	TAM	stomachache
534	1	AI	joint pain
538	1	AI
539	1	TAM
540	1	TAM	endometrial thickening
541	1	TAM	dyslipidemia；endometrial thickening
546	1	TAM	discomfort of the whole body，hot flashes
551	1	TAM
552	1	AI
554	1	TAM	endometrial cancer
557	1	AI	osteoporosis
558	1	TAM	oint pain，hot flashes
560	1	TAM
561	1	TAM	endometrial cancer
563	1	TAM	osteoporosis
565	1	AI
566	1	TAM
567	1	AI
568	1	TAM
571	1	AI
572	1	AI	dyslipidemia
573	1	TAM
575	1	TAM	hyperhidrosis
576	1	TAM
577	1	TAM	joint pain，coronary heart disease，dyslipidemia，hot flashes，increased vaginal discharge
578	1	TAM	joint pain，dyslipidemia，coronary heart disease，hot flashes，increased vaginal discharge
579	1	TAM
580	1	TAM
581	1	TAM
586	1	TAM	endometrial thickening
588	1	TAM
590	1	AI	osteoporosis
591	1	TAM
592	1	TAM
593	1	TAM	hysterectomy
594	1	AI	hypocalcemia
595	1	TAM	joint pain
597	1	AI
598	1	TAM
599	1	TAM	hot flashes、hyperhidrosis
601	1	TAM	endometrial thickening
602	1	TAM
603	1	AI
604	1	TAM
605	1	TAM
608	1	TAM
610	1	AI
613	1	TAM	irregular menstrual
614	1	TAM	hot flashes
616	1	AI
617	1	TAM
618	1	TAM	osteoporosis，dyslipidemia，nausea，vomit
619	1	TAM	hypertension，hyperlipidemia, osteoporosis；hot flashes；hyperhidrosis
620	1	TAM	endometrial thickening
621	1	TAM
622	1	TAM	abnormal liver function
623	1	TAM	endometrial thickening；endometritis
624	1	TAM	osteoporosis，joint pain，heart disease，dyslipidemia，endometrial thickening
625	1	TAM	hot flashes, fatigue
630	1	TAM	poor memory，sleepiness
631	1	AI
632	1	TAM	osteoporosis
634	1	TAM	varicose veins, vaginal bleeding
635	1	TAM	Hyperlipidemia, hyperlipidemia, joint pain
636	1	AI	alopecia
637	1	TAM	weight gain, alopecia
640	1	TAM
641	1	TAM	bladder discomfort，abnormal liver function，endometrial thickening，joint pain，stomachache
642	1	TAM
643	1	TAM	endometrial thickening
644	1	TAM	endometrial thickening
646	1	TAM
647	1	TAM	endometrial thickening
648	1	AI	urinary disfunction，increased vaginal discharge
649	1	AI	joint pain，osteoporosis
650	1	AI
651	1	TAM	endometrial thickening，ovarian cyst
652	1	TAM	hypocalcemia，hot flashes，increased vaginal discharge，anemia
653	1	TAM
654	1	TAM	blurred vision
656	1	TAM
657	1	TAM	endometrial thickening
658	1	TAM
660	1	AI	joint pain；joint pain；dyslipidemia
661	1	AI	alopecia
662	1	TAM	diarrhea
663	1	AI
665	1	AI
667	1	TAM
668	1	TAM
669	1	TAM	endometrial thickening
670	1	AI	alopecia，hypertension
673	1	TAM
674	1	AI	osteoporosis，joint pain，dyslipidemia，abnormal liver function
675	1	TAM
676	1	AI
677	1	TAM	endometrial thickening
678	1	TAM	endometrial thickening
679	1	TAM	endometrial thickening
680	1	TAM
681	1	AI	fracture
682	1	TAM	endometrial thickening
683	1	TAM	endometrial thickening
684	1	TAM	endometrial thickening
685	1	TAM	endometrial thickening
686	1	TAM	endometrial thickening
687	1	AI
688	1	TAM	endometrial thickening
689	1	TAM	endometrial thickening
690	1	AI	osteoporosis
691	1	TAM	abnormal liver function
692	1	TAM	endometrial thickening
693	1	AI	osteoporosis
694	1	TAM	endometrial thickening
695	1	TAM	osteoporosis，hypocalcemia
696	1	TAM
697	1	TAM	endometrial thickening
698	1	TAM	endometrial thickening
699	1	AI
700	1	AI
701	1	TAM	endometrial thickening
702	1	TAM
703	1	转换
704	1	TAM	endometrial thickening
705	1	TAM	sactosalpinx
706	1	AI
707	1	TAM	endometrial thickening
708	1	TAM	endometrial thickening
709	1	TAM
710	1	AI	osteoporosis，joint pain
711	1	AI
713	1	TAM	weight gain
714	1	AI	osteoporosis，joint pain，hyperlipidemia
715	1	AI
716	1	TAM	abnormal liver function、Hyperlipidemia
717	1	AI	coronary heart disease
718	1	TAM
719	1	TAM
720	1	TAM
724	1	转换
725	1	TAM
726	1	转换
727	1	TAM	rash
728	1	AI
729	1	TAM	ovarian cyst
730	1	TAM	endometrial thickening
731	1	AI
732	1	TAM	joint pain，increased vaginal discharge
733	1	TAM
734	1	AI	osteoporosis, hair growth
736	1	TAM
737	1	TAM
738	1	AI	joint pain，coronary heart disease，dyslipidemia
740	1	TAM	hot flashes、endometrial thickening
741	1	TAM	joint pain，osteoporosis
742	1	AI
744	1	TAM	endometrial thickening, hot flashes, hyperhidrosis, nausea, vomit
745	1	TAM
746	1	switch	endometrial thickening，poor memory
748	1	TAM
749	1	AI
751	1	AI
752	1	TAM	dysmenorrhea
753	1	TAM
754	1	TAM
755	1	TAM	joint pain
756	1	TAM
758	1	TAM	alopecia
759	1	TAM	hyperhidrosis, palpitation, insomnia,diabetes
760	1	TAM
761	1	TAM	abnormal liver function，joint pain
762	1	AI
763	1	TAM
765	1	TAM	discomfort of the whole body
766	1	TAM
767	1	TAM
768	1	TAM
769	1	TAM
770	1	TAM
771	1	TAM
772	1	TAM	hyperlipidemia
773	1	TAM
774	1	TAM
775	1	AI
776	1	TAM	osteoporosis，hot flashes，endometrial thickening，increased vaginal discharge
777	1	AI
779	1	TAM	joint pain
780	1	TAM	fatigue；hypertension；Hyperlipidemia；joint pain；hyperhidrosis；hot flashes；hypocalcemia
781	1	AI
782	1	TAM
783	1	AI
784	1	TAM	increased vaginal discharge
785	1	TAM
787	1	TAM	joint pain，dyslipidemia，endometrial thickening，insomnia，discomfort of the whole body，hot flashes
788	1	AI	bone pain、osteoporosis
789	1	AI
790	1	AI	osteoporosis
791	1	TAM	back itch
792	1	TAM
793	1	TAM
794	1	TAM
795	1	AI
796	1	TAM	weight gain，Hyperlipidemia
798	1	TAM	joint pain
799	1	AI	joint pain
800	1	TAM	joint pain
801	1	TAM
802	1	TAM
804	1	AI
806	1	TAM	osteoporosis，joint pain，endometrial thickening，endometrial polyp
807	1	TAM	alopecia
809	1	AI
810	1	TAM	blurred vision
811	1	TAM
812	1	TAM
813	1	TAM
814	1	TAM
815	1	AI	joint pain，osteoporosis
816	1	TAM
817	1	TAM
818	1	AI	hot flashes, osteoporosis
819	1	AI	endometrial thickening
820	1	AI
821	1	TAM
822	1	TAM	endometrial thickening
823	1	TAM	joint pain
824	1	TAM
825	1	TAM
826	1	TAM
827	1	TAM
828	1	AI
829	1	AI
831	1	TAM
832	1	AI
835	1	AI	osteoporosis，joint pain；endometrial thickening
836	1	TAM
837	1	TAM	endometrial thickening，hysterectomy
838	1	AI	osteoporosis
839	1	TAM	endometrial thickening
840	1	AI
841	1	TAM	hot flashes
842	1	TAM
843	1	TAM	hot flashes；increased vaginal discharge
844	1	AI	hyperhidrosis
845	1	AI
846	1	TAM	endometrial thickening
847	1	TAM
848	1	TAM	osteoporosis
850	1	TAM	insomnia, fatigue, irritability
851	1	TAM	uterine Leiomyoma
852	1	TAM	hyperhidrosis、insomnia；uterine Leiomyoma
853	1	TAM	alopecia
854	1	TAM
855	1	TAM	osteoporosis
856	1	AI	increased vaginal discharge
857	1	AI
858	1	TAM
859	1	TAM
861	1	TAM
863	1	TAM	endometrial thickening
865	1	转换
866	1	AI
867	1	TAM
869	1	AI	osteoporosis
870	1	AI	osteoporosis，joint pain
871	1	TAM
873	1	TAM
874	1	TAM
875	1	AI
877	1	AI	osteoporosis,fracture
878	1	TAM
879	1	TAM	stomachache
880	1	TAM
881	1	TAM
882	1	AI
883	1	TAM
884	1	TAM
885	1	TAM	endometrial thickening, joint pain, anemia
886	1	AI	osteoporosis, fracture
887	1	AI
888	1	TAM
890	1	AI
891	1	AI
892	1	TAM	irregular menstrual
893	1	TAM	joint pain；hypocalcemia
894	1	TAM
895	1	TAM	leg pain
897	1	TAM
899	1	AI
900	1	TAM
901	1	TAM	cervical polyp
902	1	TAM
903	1	TAM
904	1	TAM
907	1	AI
908	1	TAM	abnormal liver function
909	1	TAM
910	1	TAM
911	1	TAM	endometrial thickening
912	1	AI
913	1	TAM
914	1	TAM
915	1	TAM
916	1	AI	joint pain；osteoporosis
917	1	AI
918	1	AI	osteoporosis, sleepiness
919	1	AI	osteoporosis
920	1	AI	hot flashes
921	1	TAM
922	1	TAM
923	1	AI
924	1	转换
926	1	TAM	endometrial thickening
927	1	AI	bone pain, abnormal liver function, edema, discomfort of the whole body
928	1	TAM
931	1	AI	nausea；hot flashes
933	1	TAM
934	1	TAM
935	1	TAM
936	1	TAM
937	1	TAM
938	1	TAM	endometrial thickening
939	1	TAM
942	1	TAM	Hyperlipidemia
943	1	TAM
944	1	TAM
947	1	TAM	endometrial thickening
948	1	TAM	urinary disfunction, increased vaginal discharge
949	1	AI
950	1	TAM
951	1	TAM	endometrial thickening
952	1	TAM
953	1	TAM	endometrial thickening
954	1	AI
955	1	TAM
957	1	TAM
958	1	TAM
959	1	AI	osteoporosis
960	1	AI	bone pain；alopecia
961	1	AI	osteoporosis
962	1	TAM	menopause
964	1	AI	joint pain
965	1	TAM	discomfort in the whole body；hot flashes
966	1	TAM
967	1	TAM	endometrial thickening
969	1	TAM
970	1	AI	osteoporosis
971	1	TAM
972	1	TAM
973	1	TAM
974	1	TAM
978	1	AI	bone pain, joint pain, discomfort of the whole body
979	1	TAM
981	1	AI	bone pain
982	1	TAM	abnormal liver function；endometrial thickening
984	1	TAM
985	1	TAM	osteoporosis，joint pain；hot flashes；endometrial thickening；increased vaginal discharge
986	1	转换
987	1	TAM	insomnia
988	1	TAM	rash
989	1	AI
990	1	TAM	endometrial thickening，joint pain
992	1	转换
993	1	TAM
994	1	TAM
995	1	TAM	fatigue；endometrial thickening
997	1	TAM	endometrial thickening，hysterectomy
998	1	TAM
999	1	AI
1000	1	TAM
1001	1	TAM
1002	1	TAM	increased vaginal discharge
1003	1	AI	insomnia
1004	1	TAM
1005	1	TAM
1007	1	AI
